# Supplementary material for: Drug Target Prediction Based on the Herbs Components: The Study on the Multitargets Pharmacological Mechanism of Qishenkeli Acting on the Coronary Heart Disease
Source: Hindawi journal article supplement (doi:10.1155/2012/698531), 2012-01-01
Supplement: f1 [file 698531.f1.xlsx]

## Sheet: Sheet1
The predicted targets for 207 QSYI compositive compounds. For each compound, candidate target-genes (denoted by geneid) are ranked according to the decreasing concordance score given by drugCIPHER-CS (the value in the parenthesis in the following table)
compositive compound name	pubmed_compound_id	1	2	3	4	5	6	7	8	9	10	11	12	13	14	15	16	17	18	19	20	21	22	23	24	25	26	27	28	29	30	31	32	33	34	35	36	37	38	39	40	41	42	43	44	45	46	47	48
uralenin	5315125	154(0.209607763916087)	170591(0.203975994931225)	155(0.203427403520794)	84717(0.203176633087134)	7201(0.203146706961295)	23168(0.203119347681254)	4547(0.200573012443951)	90333(0.197519493652114)	83874(0.197199057118394)	7555(0.196954642540272)	827(0.196285540868237)	408(0.19493353217986)	5042(0.193810766744451)	114571(0.193078997350145)	28232(0.193078997350145)	1811(0.193078997350145)	23099(0.192757527279644)	2769(0.190633746802488)	81844(0.189731717392362)	130(0.188131018494656)	6579(0.187674010012353)	4985(0.187066786729749)	9368(0.184892441136711)	2302(0.183071154013323)	407(0.178410991610472)	6039(0.174447696810911)	94233(0.174447696810911)	283248(0.174447696810911)	112950(0.174184681368924)	9590(0.174170920397208)	3553(0.171641411643079)	6286(0.170606494897647)	55661(0.170097438294515)	260425(0.169703685090143)	1445(0.169636924451463)	285855(0.169086862393192)	6553(0.167971397158662)	10643(0.16604561222791)	11216(0.165167029313287)	84838(0.164564114488113)	132158(0.163730202652282)	2592(0.163716871355355)	8778(0.163716871355355)	28970(0.163716871355355)	744(0.163716871355355)	81932(0.163716871355355)	115761(0.163716871355355)	65999(0.163716871355355)
narcissin	5481663	10643(0.232503541070356)	6137(0.224194966280379)	6217(0.22357471628729)	23168(0.223291650211541)	84717(0.22326667415531)	7201(0.223260024097674)	6633(0.222445976969176)	23506(0.222102948018424)	10664(0.219980222208766)	8493(0.219974838586283)	1677(0.219669160110468)	10992(0.218188520705572)	22828(0.217564698939633)	5257(0.217112472474501)	27141(0.216780734172941)	3608(0.216303002568606)	79009(0.215794184089944)	6136(0.214917852019312)	124739(0.214466982543562)	8337(0.21393903422054)	6230(0.213928991446116)	220988(0.213823576446016)	6427(0.213626922145412)	9221(0.213272287383443)	408(0.212033435834914)	94086(0.211763470964268)	79672(0.210655801061353)	7555(0.209628308989268)	10250(0.208678083201895)	3594(0.20819013679606)	23099(0.206982133274724)	57018(0.205751808700904)	81620(0.205594314088062)	5042(0.204918482944401)	23450(0.204826649476377)	154(0.203364947875932)	9689(0.20301769189476)	2091(0.20279968559717)	6632(0.202433398011975)	23178(0.201617089228357)	5940(0.201472646655909)	10521(0.200810476636593)	3015(0.199732402096603)	81844(0.1996272470875)	8971(0.199576603899425)	23020(0.199514742134857)	130(0.199390140287793)	7153(0.199371034944676)
Methylene tanshiqunone	5320113	1723(0.205469158120913)	1520(0.197096066986843)	1473(0.193349766138636)	6439(0.188004159479253)	1512(0.187087730423795)	632(0.185886689135186)	121274(0.176941490055076)	6713(0.175892936893513)	2677(0.173880834240457)	2158(0.173790521195823)	51573(0.171909548528977)	11202(0.165119562796139)	54663(0.165119562796139)	6530(0.164815369967774)	167838(0.164794850093753)	9751(0.164260668287689)	4537(0.163923722634256)	518(0.163923722634256)	9552(0.163923722634256)	55890(0.163348861314946)	134957(0.162342394111319)	29091(0.16221352128731)	4924(0.160810507117598)	6843(0.160355134893719)	496(0.159624185205557)	5743(0.158795894542884)	90379(0.157722808406225)	54876(0.157722808406225)	8858(0.157479710851197)	79269(0.157386429673584)	6804(0.156404314176331)	5997(0.155824644041332)	9066(0.151865917738158)	51699(0.148441160314513)	8519(0.147985473796179)	7920(0.147090203746441)	50813(0.146083752919461)	81502(0.14472622052852)	5742(0.142997583639648)	2150(0.142280487330383)	8451(0.141446402456066)	84065(0.138865544484984)	9978(0.138767472420032)	230(0.138264215082974)	1128(0.137699149543278)	6532(0.136954056184767)	6845(0.136557308118456)	54221(0.1356712753616)
carotene	5280489	90203(0.541850607947806)	1339(0.536402054274634)	8854(0.534383435316092)	54936(0.524736047234492)	339804(0.521793855114108)	57834(0.521793855114108)	166793(0.521793855114108)	79364(0.496996351746438)	26471(0.49677331454904)	26524(0.486837866285451)	84962(0.484529713367476)	26548(0.483872702753518)	54998(0.47798934781489)	7376(0.469720929443966)	55092(0.468549225141335)	9107(0.466867424822664)	79177(0.466249677751089)	51599(0.462485039527938)	6182(0.460267046516301)	7707(0.459777252870202)	9227(0.457771534016504)	54929(0.457507376321962)	5916(0.456932875373238)	1577(0.453894638916136)	5948(0.453418493243573)	84913(0.451319848149284)	5681(0.449782835768057)	112724(0.449733080061137)	244(0.449701527653798)	5949(0.449481972312892)	216(0.449431747333854)	8994(0.449372987380245)	79413(0.449345224824142)	145226(0.449222897078041)	51619(0.446778044523731)	50805(0.44595779279727)	126374(0.443325483847801)	10062(0.437511949712964)	2197(0.437312246690148)	10579(0.436784954246933)	85415(0.432141765851973)	79982(0.431698766476144)	55175(0.431698766476144)	84885(0.431698766476144)	147495(0.431698766476144)	5046(0.43164287733042)	55219(0.430923937579382)	90411(0.430657185893017)
Darendoside B	192240	84717(0.263613420000772)	7201(0.263600353788276)	23168(0.263435911776824)	408(0.24990457545804)	130(0.245727150461959)	154(0.24347268385373)	23099(0.239356570208991)	285855(0.23127820002133)	55661(0.230741136789092)	260425(0.229785142996036)	6553(0.229187618790784)	5042(0.226107406660738)	7555(0.22312355579769)	57453(0.221705329459006)	6138(0.219625021656695)	81844(0.219593019661233)	4985(0.216296103148234)	150084(0.210901579388093)	6039(0.206227733489084)	94233(0.206227733489084)	283248(0.206227733489084)	155(0.204368393078053)	2769(0.203641903209718)	9223(0.203300087593574)	407(0.2032477192897)	57030(0.203224107182524)	28966(0.201957980739861)	83638(0.20088759887337)	90333(0.200742792573206)	10643(0.199966496331346)	114571(0.198859030221278)	28232(0.198859030221278)	1811(0.198859030221278)	57216(0.19861071929816)	6456(0.197610421810334)	25975(0.196211064994763)	10570(0.195567807681597)	9863(0.193547099675065)	83874(0.191952674555874)	6579(0.191836026344827)	827(0.191733391059837)	10203(0.191384136474351)	4923(0.191349727257124)	1445(0.189996420257685)	22903(0.189428780371182)	84545(0.188872816122983)	5365(0.187544475688672)	27350(0.187507225960234)
Miltionone Ⅱ	5319836	1269(0.302699635928501)	3060(0.219947354068748)	1268(0.217835085526987)	3061(0.213608224689022)	2769(0.210388320821202)	4985(0.207836607011804)	10891(0.207564527178568)	6138(0.201680570571953)	1723(0.201662535163888)	4489(0.201193025541952)	11080(0.197082099436105)	5493(0.1928311282191)	84838(0.181953508767856)	84717(0.179823095074613)	7201(0.179789014405519)	23254(0.179700846806227)	23168(0.179568707998508)	10871(0.179249444533187)	8382(0.178259490233406)	9516(0.177853711713507)	8727(0.175837383463057)	80205(0.175824521811933)	63925(0.175650418886555)	6605(0.175484161563277)	154(0.174967601448492)	6097(0.174964511784577)	2709(0.174896005447561)	92815(0.173700822217568)	29915(0.173423145893554)	26249(0.172690056737414)	23054(0.172632443548452)	9068(0.172415873244976)	4986(0.172041187184588)	84332(0.171485810057229)	440498(0.171345041281299)	56255(0.171345041281299)	9731(0.171345041281299)	5927(0.170760988704683)	146057(0.170558585782839)	408(0.170129235125636)	4988(0.169558398183551)	5469(0.168887991193854)	10001(0.168880263897595)	2063(0.167818638970634)	53335(0.167577559330294)	8820(0.1672617092454)	9440(0.167128972172951)	117581(0.167076512067189)
Isoferulic acid|4-Hydroxy-3-methoxycinnamic acid	736186	84717(0.214174571011825)	7201(0.214134252797288)	23168(0.214130874405715)	154(0.212009532760939)	408(0.211850002980414)	84838(0.195078062195299)	55661(0.191785881554135)	285855(0.190748272184223)	9516(0.190369026439336)	6553(0.189216219349732)	130(0.188551594549697)	10885(0.185897608570954)	3795(0.18516264843189)	23099(0.183689854168273)	4489(0.183559525666009)	5042(0.181918324504212)	10871(0.181326550008765)	4985(0.179832963855651)	81844(0.177940363067268)	7555(0.177918612757745)	83874(0.175818163132197)	827(0.175536682293251)	155(0.174536373316354)	260425(0.173191714371465)	84545(0.171708894211663)	10203(0.171138940834883)	4923(0.170499912400729)	83641(0.168822445582811)	7068(0.167678864475368)	4842(0.167353832998113)	10474(0.167192278896057)	57453(0.166009373505774)	1445(0.165419953916375)	51316(0.165215725520006)	5744(0.165122208625548)	2769(0.165109974510474)	407(0.164758011120377)	81873(0.16427667603554)	7067(0.163293873488013)	90333(0.16303408072144)	6039(0.162703594493958)	94233(0.162703594493958)	283248(0.162703594493958)	11214(0.161477453737129)	7200(0.161005979748662)	409(0.160802341015244)	9590(0.160295152000089)	5138(0.160205239027487)
Ononin	442813	10643(0.173031168258778)	6217(0.166696578484386)	150084(0.164339110645852)	5257(0.161814463459261)	23099(0.161266921720098)	3608(0.16017753947742)	6137(0.156850754578347)	23168(0.154668220555579)	84717(0.154588263634611)	7201(0.154587974147914)	51426(0.154493292954391)	9768(0.154145034423244)	11196(0.1540577335256)	130(0.153371444496759)	10885(0.151157657006681)	79002(0.151136364575084)	124739(0.151121953269897)	79672(0.150234679187053)	6138(0.150133623831878)	9223(0.148578180794882)	57030(0.148521654371554)	260425(0.147942715480948)	10871(0.147363830623918)	9583(0.147290849916816)	58478(0.147290849916816)	285855(0.146761515265349)	131474(0.146512097733382)	6456(0.14612921981112)	3183(0.145894941100014)	5042(0.145716923310042)	55661(0.145389636299239)	23178(0.145297883017373)	28966(0.145286618284804)	6553(0.145227714595251)	7555(0.144955544423491)	83638(0.144909564262229)	3594(0.144661473992173)	8972(0.144119237053671)	51106(0.143833188645341)	22944(0.143460391990607)	25975(0.143390495842931)	57453(0.143076045080395)	220988(0.142983641444053)	9188(0.142937747159217)	26521(0.142895595435529)	1660(0.142835376954111)	8099(0.1418858887444)	9863(0.141830345800172)
Viscidulin Ⅲ	442327	54345(0.252250410117641)	3148(0.251898719014843)	11082(0.247590443103196)	7087(0.247283886828292)	3223(0.243749758133581)	3234(0.243749758133581)	63974(0.243749758133581)	83937(0.243749758133581)	3232(0.243749758133581)	3683(0.243741202143692)	2296(0.241066222340202)	3237(0.24084032483154)	3385(0.240272356710116)	79611(0.237854928204121)	7044(0.234875501642448)	4298(0.234749487595792)	3146(0.230101100815909)	4775(0.227263005821044)	4335(0.224171747221435)	3235(0.222359954677551)	7110(0.222168742306794)	5452(0.221205257261007)	6996(0.214678274457087)	79915(0.214140613286409)	7468(0.213370992107264)	147912(0.213251842184295)	1463(0.210901862722975)	9604(0.208486213020742)	23598(0.208369062400753)	5883(0.208336355423671)	135458(0.207897417877692)	7818(0.207863087969182)	8805(0.207633437875828)	55827(0.207370769606771)	5460(0.20717883492459)	474(0.206440136436439)	2078(0.206248518800486)	54957(0.205508572700075)	7556(0.204616817823443)	8409(0.204376908500621)	9937(0.204062377454162)	89797(0.202607077056741)	442867(0.202442762455508)	6599(0.202297119517207)	23780(0.201851904117139)	25803(0.201850849695688)	442868(0.201828640729464)	9083(0.201828640729464)
Liquiritigenin-7，4'-glucoside	5319048	260425(0.288850352018261)	5042(0.28690557736672)	57453(0.285539665427908)	81844(0.27980866549122)	84717(0.275561496299706)	7201(0.275555265769252)	23168(0.275320833149066)	154(0.274461796207344)	130(0.273753352067834)	7555(0.273495369248141)	150084(0.270072690006555)	6039(0.267440342267287)	94233(0.267440342267287)	283248(0.267440342267287)	28966(0.263191207889231)	23099(0.262568092008661)	83638(0.261956240532446)	408(0.261330989298883)	57216(0.259521756183988)	9223(0.258021179513361)	407(0.257755847022696)	285855(0.256696323848208)	55661(0.255704245110626)	10570(0.255384591312171)	6553(0.254320385993403)	57030(0.253753566193106)	6456(0.251749850943342)	9590(0.247970466789723)	4547(0.247613241011641)	25975(0.246754071608642)	9863(0.2452051405902)	153(0.242959956198066)	10969(0.239225045022976)	22903(0.239049110891999)	27350(0.238344616801674)	6138(0.237099640276345)	11079(0.236927200986561)	6457(0.236895372982986)	5365(0.236845243068696)	4897(0.23648820359503)	83737(0.231242637598434)	3553(0.226558626338727)	5420(0.226351742711832)	1445(0.226266064182137)	155(0.22515832266632)	9683(0.224350918129997)	3502(0.223172613823035)	10675(0.223172613823035)
Methionine	876	7975(0.606370090017853)	9647(0.603047906999196)	79853(0.59806694642531)	84140(0.590798746355934)	9521(0.58605353873139)	582(0.58600951933074)	9603(0.58407388131309)	635(0.580300380048883)	4552(0.577201372556577)	326625(0.577201372556513)	4141(0.577176728118471)	79796(0.573247287309343)	9255(0.573009116751319)	583(0.540688725362885)	150274(0.528280647038495)	80184(0.525851782766738)	585(0.511829004285426)	5859(0.508099182503897)	3735(0.50759067913464)	51520(0.505271331189102)	5917(0.500823926073124)	7965(0.497486788922097)	4144(0.496253193789385)	27430(0.477284249039884)	64431(0.469621323651622)	10988(0.462681178153699)	2058(0.433654131681851)	1615(0.433537683767312)	51031(0.425749519400262)	4548(0.42411211578604)	4048(0.421575484883751)	55856(0.417691415069123)	7019(0.413142483211004)	1968(0.412134947029043)	23011(0.409051674239324)	7458(0.405186846844563)	7030(0.400295888773621)	57096(0.400063052497224)	9761(0.39984605845109)	10380(0.399152473168013)	64928(0.386902345883715)	55501(0.384065380265113)	56886(0.382384284172977)	7942(0.372371021209697)	284615(0.368576739351925)	51124(0.365873543144958)	338599(0.365873543144958)	55190(0.365873543144958)
Ferruginol	403773	10025(0.327207220921004)	9968(0.326363553710732)	9477(0.322383197950015)	2872(0.32181431165911)	9439(0.320971883138996)	22887(0.320618436926169)	23030(0.320395197041227)	56751(0.320316451006117)	84246(0.319283519683495)	9443(0.31908172223432)	57109(0.318386510114285)	286827(0.318386510114285)	7195(0.318231293222915)	10001(0.317522077856809)	6594(0.317414983013222)	9209(0.316182419815987)	6720(0.312345433587718)	23543(0.312001656479567)	9031(0.309371675546933)	10463(0.308983228736344)	1024(0.308702110859789)	892(0.30789090756731)	7494(0.306616603853141)	9412(0.305635969921528)	9440(0.305102957579044)	9208(0.304977414122895)	29028(0.304920588941672)	135112(0.304693023527793)	9969(0.304359551958955)	9355(0.304094825664116)	170463(0.30395062705892)	79447(0.303554833672429)	23788(0.303012195683978)	29931(0.303012195683978)	5458(0.303012195683978)	57541(0.303012195683978)	5992(0.303009382061319)	55062(0.302526962287173)	91614(0.302455319037047)	3155(0.302370967820374)	285464(0.30225211000357)	7799(0.301917466002753)	5457(0.301876252270014)	8085(0.301846449762758)	8727(0.301615216826423)	2314(0.300914867084098)	8295(0.300177051429883)	3670(0.300110184412827)
7-Methoxybaicalein	5281605	4586(0.195358831383033)	56667(0.194851316882135)	79623(0.194839817737944)	79695(0.194480167804363)	4583(0.194283364262606)	3567(0.193617199611786)	728(0.183419279116895)	156(0.176837210239456)	10267(0.175739159993849)	84545(0.173492401906095)	4923(0.173255372534057)	83539(0.172108063360369)	3973(0.171078116341617)	10203(0.170534024282354)	170591(0.170287932385245)	55661(0.16468971632521)	7200(0.164412501839496)	285855(0.16403310453874)	6553(0.162061177308186)	409(0.160210718101274)	10636(0.159284842413744)	150(0.158836436625409)	1429(0.157262866979259)	85406(0.155957321752682)	1318(0.155884981612595)	130(0.154617296143226)	2138(0.151880919174278)	2139(0.151783421108846)	51804(0.151266186761668)	1967(0.150126185737161)	153(0.14975547121362)	3972(0.149592623182729)	4489(0.149579972876671)	84717(0.149006806444717)	7201(0.14897762988697)	408(0.148972178885493)	23168(0.148516777632517)	2869(0.148270491386907)	4987(0.146218910252772)	5368(0.146055725444503)	23566(0.145740153890774)	2771(0.144309540899692)	4295(0.144161327564822)	2862(0.144075525351958)	7049(0.143876007143629)	6870(0.143720910005709)	6865(0.143720910005709)	2775(0.143634929138321)
scopoletin	5280460	342574(0.164195004566285)	4547(0.163875692791633)	83874(0.159717132752222)	79577(0.159067255299741)	144245(0.158785262521861)	84920(0.158784198271905)	10885(0.158299528103445)	827(0.156794475045794)	399(0.155519269211786)	23168(0.15522590120284)	84717(0.155125539588137)	7201(0.155093365722486)	3855(0.154039861975964)	408(0.149910048760123)	90134(0.14738272429791)	3757(0.146368232464518)	3754(0.145633433796617)	154(0.145522297371182)	3756(0.145025361089134)	9992(0.144881557701582)	1135(0.143916356317553)	3795(0.140998949203713)	4985(0.139039726679655)	3872(0.138570724332377)	4489(0.138169975419907)	92285(0.138149620497085)	79020(0.136622040212345)	2652(0.135703557921392)	1445(0.134720419792071)	6633(0.134676440411553)	55661(0.134089193070503)	4842(0.13397754128314)	7412(0.133598728406381)	285855(0.133456474017841)	23099(0.133375919986452)	6553(0.132241413391854)	4923(0.13158588792581)	58189(0.131483630851537)	130(0.129979731070481)	84545(0.129475138297219)	6901(0.129359091307129)	10846(0.128349233687509)	10203(0.127733758862596)	51754(0.127287794785344)	54212(0.12707774350671)	4883(0.126999883953341)	23506(0.126630450075346)	10493(0.126567829105459)
??n-Tridecane	12388	3652(0.23748122736933)	2976(0.225047768549501)	1139(0.220724405373989)	112(0.217890116811007)	57658(0.21148733899047)	1137(0.209624229434058)	80852(0.208562456768926)	1464(0.206540651638418)	2898(0.202590213053511)	7447(0.19676059372674)	79174(0.193814566075728)	9536(0.19168513486947)	1412(0.191326731892303)	50943(0.185017108711968)	8499(0.182693556291259)	2900(0.179357396827702)	909(0.173200931995096)	2901(0.171918566149059)	9734(0.17121557327249)	2895(0.169836025369974)	8694(0.168881698051759)	36(0.165553106052348)	5732(0.164215466442868)	721(0.162069733100881)	2891(0.161506400381199)	6336(0.1601700412765)	5731(0.1598917201135)	725(0.158403026194977)	10544(0.158377154779054)	56259(0.157898830420475)	5730(0.156827671614724)	64130(0.156531633092642)	1002(0.153175639976872)	29062(0.152301283421363)	5792(0.151430760147581)	6386(0.149444913483188)	23150(0.146680115015976)	132320(0.14321217768189)	9265(0.143132210335173)	923(0.139072169475022)	5733(0.13839490215855)	1000(0.135140720431206)	6711(0.133755852918892)	8933(0.132733727618347)	55374(0.132733727618347)	152815(0.131464738827094)	10369(0.131394065479141)	27111(0.130813073590748)
Aconine	10511	6871(0.428922740475846)	119710(0.42763719497255)	6554(0.42612375460214)	9669(0.425817225413494)	6601(0.424173601295609)	481(0.420226175095993)	3211(0.419830095751834)	3175(0.419036897632735)	11319(0.41868337372826)	4857(0.418658291041065)	64061(0.418366454779429)	5087(0.41722603562169)	6249(0.416589995657683)	158399(0.415701035166561)	1059(0.415660896770843)	23469(0.415592323540201)	5799(0.414556327528345)	7267(0.414156450265388)	8125(0.413466428204093)	10092(0.413240164672226)	23215(0.412689994503573)	6430(0.41193784651786)	225689(0.411386917136137)	3218(0.410550311286182)	1781(0.410041731568811)	3460(0.409374886185321)	915(0.409354159608653)	9729(0.408385226073624)	4297(0.408149287885152)	55617(0.405525706588338)	57282(0.40378788096365)	3895(0.403613174938591)	5279(0.402134917008632)	8028(0.399088392174669)	6756(0.398514119919554)	5209(0.398344208068991)	10444(0.39687220217157)	63876(0.396712586265351)	9284(0.396680264080232)	3423(0.396680264080232)	10100(0.396680264080232)	280(0.396680264080232)	9130(0.396680264080232)	7110(0.396636341399079)	9168(0.396612691754829)	7026(0.395835237742176)	9716(0.394701633174319)	81846(0.392600391517272)
Skullcapflavone Ⅱ	124211	154(0.208148572740395)	84717(0.201955552476076)	7201(0.201916790011447)	23168(0.201704977005646)	55661(0.199486920710273)	408(0.198963559607826)	285855(0.198691430629572)	130(0.197353151686072)	6553(0.19657953984804)	2769(0.19088955229995)	170591(0.189004550750169)	4842(0.188422317882757)	4923(0.187802717186647)	84545(0.186293207632499)	54585(0.185849478838036)	10203(0.185152910216886)	827(0.184476167623711)	7855(0.184066711602092)	9630(0.1830067044906)	5042(0.182791141747326)	81844(0.182398137114426)	10267(0.181771799937397)	3795(0.180478884562988)	83874(0.179642765399539)	2652(0.179368826291262)	23099(0.176702438068736)	7200(0.17537260055894)	260425(0.173606197053078)	4985(0.173106569488026)	409(0.172224631029066)	153(0.172189185863749)	4489(0.168370970265482)	7555(0.168219398187007)	57453(0.167448359735317)	1445(0.164839960334108)	2870(0.163347529011905)	6286(0.162362433636309)	1318(0.161275945966042)	6039(0.161216357293559)	94233(0.161216357293559)	283248(0.161216357293559)	156(0.159386417204311)	2767(0.158859591139919)	3360(0.158811765048801)	728(0.157486123961405)	2862(0.156184156016527)	4295(0.156164034435347)	2869(0.156122568929453)
Tyrosine	6057	6898(0.41286911866013)	8565(0.394970793297438)	29969(0.38732125879564)	7054(0.376947089569603)	112950(0.313531131633777)	124402(0.305967557596024)	57407(0.3047238054347)	84255(0.3047238054347)	113000(0.3047238054347)	7730(0.299046758263609)	2302(0.298827503952604)	9104(0.288700863236937)	51067(0.287393818427242)	113179(0.28398880198782)	8638(0.283907644340625)	55588(0.281262916480042)	8788(0.271685641026175)	9321(0.26717981812157)	7342(0.265848378772705)	28908(0.255415289942088)	984(0.251398468459328)	10667(0.249151068768647)	23428(0.239436607891217)	7738(0.238872120191042)	6123(0.238530133069871)	1662(0.238530133069871)	10438(0.238395267768998)	132158(0.235011287740766)	51605(0.234784065548282)	51700(0.234403832518919)	4956(0.234317516966558)	2592(0.234100864102142)	8778(0.234100864102142)	28970(0.234100864102142)	744(0.234100864102142)	81932(0.234100864102142)	115761(0.234100864102142)	65999(0.234100864102142)	57707(0.234100864102142)	115708(0.233778903400248)	6676(0.232983565289536)	7171(0.231131215136752)	134265(0.230860419947997)	1192(0.221173482058576)	55833(0.220650268999148)	24138(0.218979690253746)	9319(0.217697087561441)	79092(0.215967225236256)
Valine	6287	586(0.593796081711562)	85476(0.53372643970409)	88455(0.487973851769064)	9255(0.467279829666066)	9521(0.465055448134665)	4090(0.437924956865272)	51520(0.43525208573491)	3735(0.418324755435579)	7965(0.413552800252163)	3813(0.413055286351405)	5917(0.407175669680091)	5859(0.399292307692755)	587(0.387555672667279)	3824(0.386496843323381)	54893(0.376219376725736)	2058(0.375139874997602)	1615(0.37323786901702)	51031(0.365585387430856)	4048(0.363071378886638)	7019(0.362481645439818)	3106(0.360069739841796)	65975(0.359138494574902)	7030(0.358925324866731)	92104(0.358371447911998)	9725(0.358371447911998)	56521(0.358371447911998)	54487(0.357815067511674)	57096(0.356258004930135)	55856(0.356139526968323)	4141(0.351784984548667)	23011(0.349399815912766)	7458(0.347086819582162)	1936(0.342583345112932)	64928(0.341271672202648)	9761(0.340485559708278)	3376(0.336968353050255)	1479(0.336424651610964)	10380(0.333695625770592)	7942(0.327032074491279)	7174(0.326450737791883)	54517(0.326450737791883)	83473(0.326450737791883)	55501(0.325668817078096)	1652(0.325488615035051)	5096(0.324425269582454)	56886(0.324146952436226)	23760(0.321751640706637)	84300(0.321693707442062)
Aucubin	91458	279(0.325300705672573)	2548(0.323855899912607)	8972(0.318398912899772)	3018(0.257667483152573)	84958(0.256450889309954)	51499(0.252634292571584)	6773(0.247589892002658)	6476(0.247196717851634)	3730(0.24046301703546)	1562(0.24046301703546)	5442(0.240399105647174)	85366(0.237369787817042)	114088(0.237344513501658)	339965(0.23708567304966)	2975(0.235746759064925)	9583(0.228891597338512)	58478(0.228891597338512)	51106(0.228565718762226)	131474(0.222003327287786)	127703(0.221290993485975)	4814(0.21982911853382)	8897(0.219539861920445)	6210(0.217829746070891)	26521(0.217677095629522)	6193(0.216765214282764)	654817(0.215538091088272)	6232(0.21470319881893)	5653(0.21415967870025)	8099(0.212524651050013)	50511(0.209796500105876)	51426(0.209771292360054)	11196(0.209389959646824)	9768(0.209389327945484)	462(0.209212306637948)	5937(0.205458371175192)	2140(0.205395737946165)	64841(0.202772971681396)	11201(0.197641614070287)	3032(0.196172597063244)	51110(0.196142724996342)	333931(0.196112915518502)	10597(0.196032597490646)	51388(0.19603232894878)	8704(0.196021681289051)	3906(0.195420626308596)	10734(0.195185943960586)	9985(0.195149623860081)	64772(0.194668734114949)
Propionic Acid	176	9255(0.345111249267901)	51031(0.342201617266413)	55856(0.342085971181833)	3735(0.341165530180717)	4048(0.340127173875814)	7019(0.336807437991698)	9521(0.325862522713554)	7458(0.323962511438485)	23011(0.322368161509175)	10483(0.322361600842167)	55854(0.322290831045244)	84263(0.322290831045244)	51126(0.322290831045244)	51571(0.322290831045244)	131076(0.322290831045244)	7873(0.322290831045244)	3157(0.322290831045244)	55831(0.322290831045244)	8270(0.322285430284023)	8803(0.320649723873971)	9761(0.31850730263619)	1201(0.31802337748227)	51119(0.317033531250172)	1479(0.316645622847436)	10380(0.314622696806621)	64928(0.313380772452625)	2617(0.312440963499305)	493856(0.31174316330606)	570(0.308497363283272)	9641(0.308456176878211)	55501(0.308277811430183)	10330(0.307905642317501)	10434(0.307197308615342)	56886(0.306718264705539)	5756(0.30457527339633)	23760(0.301347517053118)	5714(0.301336086188999)	84300(0.301276597117095)	124801(0.299523880639563)	1652(0.299437845647239)	7965(0.299374257785122)	5859(0.297493490202461)	51520(0.294516523922651)	51651(0.28934122687951)	5917(0.28924214954499)	1615(0.288397244175585)	389(0.287927339753302)	189(0.284183361209377)
uralenol-3-methylether	5315127	4547(0.216231920470446)	827(0.176518282233709)	10664(0.175937874640808)	83874(0.175521767410157)	94086(0.168194650784696)	154(0.166122094562553)	23506(0.164899026038392)	4985(0.163000124824601)	6633(0.161720886748652)	2769(0.16088675663706)	1677(0.160453563140385)	90333(0.159457011714922)	27141(0.157707151311944)	8493(0.157700248367206)	22828(0.157669358190155)	79009(0.1564281241873)	2091(0.156246538903497)	10885(0.15556651736191)	8337(0.155291567387388)	23178(0.155152188282479)	23168(0.154362433812533)	84717(0.154301871619502)	7201(0.15427056580053)	5257(0.153929757668133)	51053(0.153906687933737)	114571(0.152873661080205)	28232(0.152873661080205)	1811(0.152873661080205)	220988(0.152430146202225)	6427(0.15178400681064)	9221(0.151772401987314)	81620(0.151125535648016)	6579(0.15106615803361)	11066(0.150692611196121)	6137(0.149387901738464)	6901(0.149195921971037)	6230(0.148926686593104)	9368(0.148172997403232)	6136(0.148082186865844)	3015(0.147879449623022)	3225(0.147759902237119)	5042(0.14772107282775)	408(0.147658189196565)	10643(0.147328620952567)	7555(0.147191603940807)	10250(0.147178102863195)	134353(0.147061658908605)	1135(0.146604843721583)
Salidroside	159278	7201(0.27993310147556)	84717(0.279922170791182)	23168(0.279756836097728)	5042(0.277237172425326)	260425(0.271706990888389)	154(0.271492784002242)	7555(0.271483127374189)	81844(0.270568681378831)	130(0.268814245311794)	57453(0.265237584639764)	23099(0.26462259725465)	408(0.262902461487028)	150084(0.257845397552408)	6039(0.256266101501794)	94233(0.256266101501794)	283248(0.256266101501794)	285855(0.25137644431715)	407(0.250945098853223)	55661(0.250903828676462)	6553(0.249277865253947)	27350(0.243542380378144)	9223(0.24289927135959)	28966(0.242449572711901)	6138(0.241721797512248)	83638(0.241469382916674)	57216(0.240280872202016)	57030(0.23707900001039)	10570(0.235363410420075)	6456(0.234692845827394)	83737(0.232900853678567)	155(0.231344176359898)	3553(0.231210219771883)	9863(0.230716699675196)	25975(0.230419099662843)	153(0.225104921508433)	9683(0.22503346306205)	10969(0.224857904028991)	22903(0.222705327019412)	90333(0.221134828826631)	5365(0.220405279212345)	10871(0.220202280986903)	9590(0.219054802286715)	114571(0.218146716634926)	28232(0.218146716634926)	1811(0.218146716634926)	11079(0.217499739210547)	1445(0.21702516505874)	5420(0.216857515393172)
deoxyaconitine	6426870	79915(0.28751260530537)	50487(0.283043329106555)	5883(0.279198306593636)	7041(0.276565392532049)	135458(0.275549164743251)	573(0.272599946311052)	7110(0.272033709211369)	6554(0.268004683872834)	119710(0.267594851487964)	55827(0.266932339535321)	6871(0.266429077831797)	9669(0.263475967333862)	7272(0.263076320603596)	9604(0.262044837672357)	23215(0.260909579092501)	54957(0.259717351049065)	5087(0.258638467433308)	3175(0.258592235896342)	1059(0.258111004241246)	4857(0.258059952900358)	11319(0.25790108447646)	158399(0.257550115105487)	3211(0.257141680980252)	6756(0.256990060159847)	64061(0.256971225556192)	8028(0.256591757049326)	23469(0.256217218526229)	915(0.256008275081745)	481(0.255685485514005)	6601(0.255575168720702)	1044(0.255329224570423)	6249(0.254335080682456)	7267(0.253929776344347)	10092(0.253514703101419)	225689(0.253065423483358)	5799(0.252384155906865)	57282(0.252216833221402)	8125(0.251915761781721)	493829(0.251017935829109)	147339(0.251017935829109)	26147(0.251017935829109)	55617(0.250958246838309)	3218(0.250467725789157)	3460(0.24988198907262)	7026(0.249341532202501)	24148(0.249056140082916)	9716(0.248977554597681)	6618(0.248810209164593)
isolicoflanonol	5318585	5042(0.258118930137271)	84717(0.257674254479058)	7201(0.257634957621176)	23168(0.257565432952566)	7555(0.25662130290888)	10871(0.254773657531477)	154(0.254474949544907)	81844(0.252943307545829)	408(0.245492622394015)	55661(0.239129651054923)	130(0.238558571868078)	285855(0.237882005707535)	84838(0.236893200939198)	6553(0.236365382841802)	23099(0.235200603957263)	260425(0.234956863613022)	407(0.233139098728828)	6039(0.232520496661636)	94233(0.232520496661636)	283248(0.232520496661636)	57453(0.227517314874727)	3553(0.22559936200443)	155(0.220148396468255)	84545(0.218551984216988)	10203(0.218331796128449)	4923(0.211717842983152)	83737(0.210028747186872)	90333(0.209659071276668)	10969(0.208005432132814)	1445(0.207363820286277)	7200(0.207158930204402)	4489(0.204167082119391)	9590(0.204031416404417)	3360(0.203448653878911)	4897(0.203401714157109)	114571(0.202122843320519)	28232(0.202122843320519)	1811(0.202122843320519)	9683(0.201365633350197)	8727(0.200626465994156)	6579(0.197952866220475)	9440(0.195664408757009)	9368(0.195141764701334)	5420(0.194945185179027)	11214(0.194664645381967)	6456(0.194463219128423)	409(0.194057309312078)	57030(0.192929928618556)
salicylic acid	338	1645(0.375525568963658)	4537(0.354453889000424)	518(0.354453889000424)	9552(0.354453889000424)	55890(0.353957249848661)	5743(0.351792087108122)	4924(0.350739385629826)	50813(0.344741672598365)	7920(0.343702226470855)	201456(0.341179769742901)	6468(0.340809293219196)	26260(0.340617435484143)	26224(0.337926868397675)	8451(0.329057241457815)	282974(0.324053738627777)	81502(0.323034862821002)	56475(0.322373548024751)	8454(0.321619033171213)	26190(0.317912121674937)	5742(0.315822329840827)	84065(0.315792296155967)	8533(0.312042246303487)	8455(0.30970816964132)	9978(0.30839463754008)	51316(0.303887049583356)	10987(0.299934054579871)	84893(0.29676104392544)	8528(0.293091424135826)	51250(0.292884992961608)	5498(0.290886201296933)	26272(0.279110481139336)	8519(0.276029832853057)	10430(0.274862008046614)	83461(0.273526671199577)	26133(0.268932185906558)	26259(0.250831961642448)	56254(0.249570666336375)	114907(0.248889575032884)	5705(0.237871580922295)	5707(0.23226274296364)	128710(0.214410816447369)	240(0.206429371206699)	27170(0.204256218333684)	241(0.204123019998284)	26232(0.203389954044223)	11236(0.199782152033112)	56311(0.199087940649578)	9512(0.197134818875198)
Nortanshinone	5320219	414060(0.167208298151252)	259173(0.167208298151252)	26207(0.16227487297603)	183(0.158085322953939)	57085(0.157385853212976)	624(0.152819330700485)	185(0.146604266397032)	4142(0.146103573698931)	84717(0.144859520823724)	7201(0.144832538267283)	23168(0.14445819796572)	525(0.143221021228381)	130(0.14124747269741)	115727(0.140054293662605)	8906(0.139205703653603)	221527(0.134105840752555)	6855(0.132774193125317)	5868(0.131973254019261)	4897(0.130551338051542)	1636(0.130334529401625)	2869(0.129470263957167)	4923(0.127713379410316)	1318(0.127038405238267)	408(0.126961726377246)	22903(0.126880824657249)	23099(0.126706565802197)	266747(0.126618098172329)	23179(0.12647232368888)	5365(0.124426469686318)	55661(0.123585955495812)	54585(0.123504114254667)	285855(0.123294801705941)	186(0.122800150308542)	9770(0.122616224287708)	157(0.121364440964945)	6553(0.121337804620618)	153(0.120869590687405)	6843(0.119850604382437)	7855(0.11961470879649)	10203(0.119409495570754)	54922(0.119055162699212)	156(0.119016728765247)	6456(0.118480079359337)	121274(0.116451888834903)	84545(0.116369022264048)	79695(0.11630430818333)	6713(0.115802678549607)	10267(0.115386630094137)
α-Terpineol	17100	51523(0.420473742376419)	6996(0.420354730800285)	573(0.407891019215941)	51162(0.403080315348548)	79611(0.402004597611117)	5927(0.400712326290002)	7044(0.398208483187343)	4298(0.398087321217362)	5451(0.396795156677367)	6621(0.388442580790749)	8805(0.384683946950883)	6602(0.383771563830404)	7556(0.381501596589159)	861(0.378810355620063)	55536(0.373173331181975)	79812(0.373173331181975)	5547(0.369440210946507)	3236(0.365555776843563)	57719(0.365513685895346)	57017(0.365355018884681)	51412(0.364056819898095)	57733(0.362733284739725)	84695(0.362394599521992)	6595(0.360161805814519)	86(0.359800600463039)	5452(0.359244023123769)	83861(0.359008404568545)	55088(0.359008404568545)	55146(0.359008404568545)	10610(0.359008404568545)	79673(0.359008404568545)	57136(0.359000869707427)	11018(0.358964486059774)	23174(0.357090352858115)	11108(0.356993019604536)	9697(0.35693891183332)	143(0.356056362386775)	1022(0.355721631455861)	8372(0.349197735867093)	6582(0.347271857578081)	10499(0.347190918947237)	9282(0.346635727689972)	148479(0.346110838266459)	2354(0.34472301680059)	267004(0.344634861052637)	57338(0.343128505906816)	51111(0.342483910865235)	80772(0.342117162945558)
Licoisoflavone A	5281789	5042(0.272176238791004)	7555(0.271509402843888)	154(0.269142277480206)	81844(0.26680132811134)	84717(0.265104508074033)	7201(0.265065990581825)	23168(0.264971544372962)	10871(0.261127562604311)	408(0.253294663275647)	260425(0.250687322153074)	155(0.247462115959671)	407(0.24669525405216)	6039(0.246079172310293)	94233(0.246079172310293)	283248(0.246079172310293)	23099(0.244083363057675)	55661(0.243694329834816)	130(0.243687411129089)	57453(0.243164093622311)	285855(0.242443701432001)	6553(0.240949842963952)	84838(0.237591725556693)	3553(0.237444772767618)	83737(0.22138954485728)	1445(0.218633807665997)	9683(0.216750095976897)	10969(0.216388167121976)	84545(0.215709732077984)	10203(0.215460418072226)	90333(0.215307400779486)	3360(0.214322575510248)	4897(0.213921904812259)	9590(0.213598426507052)	4923(0.209036932095194)	114571(0.207537425035965)	28232(0.207537425035965)	1811(0.207537425035965)	6456(0.206281810238485)	9863(0.206018412470673)	5420(0.205966910978291)	57216(0.205780740235388)	57030(0.205056375531914)	22903(0.20472806124851)	7200(0.204565896355542)	170591(0.204318110806295)	5365(0.203634368423125)	6579(0.203016828810813)	27350(0.202680801305343)
Chlorogenic acid	1794427	6138(0.245559810165735)	84717(0.242440937441007)	7201(0.242438679457578)	23168(0.24231141207699)	408(0.238629510773726)	23099(0.231326758644452)	7555(0.230854014546854)	130(0.228099121783565)	10871(0.223670112611494)	2671(0.222096514228393)	260425(0.218352277337877)	9516(0.216700815283064)	6638(0.213265700971159)	57453(0.21260518829695)	5042(0.211013744251176)	407(0.210953850767521)	154(0.210389667095172)	83638(0.21008464593376)	55661(0.209470361420863)	10570(0.209173165376091)	9863(0.209120988705997)	150084(0.208871451895345)	28966(0.208851948750946)	8926(0.208804554448313)	155(0.208627690759729)	285855(0.207898763356036)	79672(0.206846339130695)	6553(0.205940117143659)	51316(0.205809663964237)	81844(0.205541430454678)	10969(0.205149363704155)	4489(0.204894538284911)	57216(0.203997719772188)	9223(0.203029801855613)	124739(0.202572740033913)	6039(0.201188282413325)	94233(0.201188282413325)	283248(0.201188282413325)	11079(0.197507987329963)	54165(0.196967199352023)	10276(0.194096688974509)	6456(0.191215595420851)	57030(0.190310463186806)	6238(0.189689326167087)	25975(0.188831992847783)	5744(0.188223823429381)	3502(0.187876312085477)	10675(0.187876312085477)
1-hexene	11597	3652(0.364923631373652)	2976(0.363551944614282)	57658(0.347829769865781)	1139(0.344003720424554)	112(0.338077711857292)	1464(0.337267718417873)	80852(0.327274223606002)	2898(0.317495727780813)	1137(0.311569046492086)	7447(0.295340431916846)	79174(0.294650807280253)	8499(0.284770080748451)	2900(0.27594591613579)	2901(0.273194628583178)	2891(0.270092620833732)	2895(0.267438398019672)	909(0.265616420243033)	8694(0.263184883663314)	5792(0.262508556311389)	6711(0.25483062881152)	64130(0.249886880153707)	6386(0.246538603322064)	1002(0.24538234380806)	29062(0.244118403329963)	7706(0.236239691941366)	1000(0.235222156626826)	1412(0.234028066516708)	23150(0.232442057496261)	56259(0.231625980036755)	9265(0.230446631778313)	10369(0.229500613712408)	923(0.225434944416665)	27111(0.218635275508021)	9536(0.21774666665802)	152815(0.21599702399777)	92912(0.2145685400718)	7364(0.211023048635359)	79169(0.205027900040846)	5732(0.204371965267843)	6659(0.203485173030118)	2559(0.201909836596596)	2557(0.200106354962484)	2892(0.199396431879631)	8933(0.198150575724333)	55374(0.198150575724333)	5731(0.196679830783474)	26071(0.195688666775878)	23426(0.194410847260003)
Benzoylaconine	121312	6336(0.286519251497969)	132320(0.283720053237978)	23327(0.230182560457924)	7272(0.219872464469073)	50487(0.217422448741284)	7041(0.213852207718064)	481(0.213003242280529)	81027(0.209882957364828)	9669(0.20841201988886)	915(0.208143351436693)	6554(0.207804926823442)	119710(0.207635565208984)	6871(0.206542723990888)	5366(0.205973589932787)	5799(0.203674768755836)	9716(0.203024462518406)	23215(0.202613448531841)	158399(0.201765793763241)	8125(0.201743071299428)	1059(0.201130862977973)	23469(0.200698371902624)	55617(0.200658341970484)	5087(0.200580140597069)	3460(0.200524976222661)	11319(0.200049333417237)	64061(0.199934494462987)	3175(0.199791830062234)	4857(0.199696043595477)	6601(0.19956344258681)	1780(0.199486926188149)	6249(0.198945433865505)	9729(0.198761061472544)	3218(0.198646604377114)	7267(0.198396867472656)	4891(0.198005026153355)	225689(0.197341617925066)	10092(0.196844147294518)	6756(0.196831260745557)	8028(0.19641831011656)	3211(0.196380058301847)	54602(0.196378859036805)	9413(0.196166928631074)	7444(0.19539598837547)	638(0.195083941914326)	7026(0.194213052373452)	7295(0.19348104770872)	6598(0.193277352816613)	7536(0.193017637213381)
Martynoside	5319292	84717(0.231286773342183)	7201(0.231276154857114)	23168(0.231087684367795)	154(0.219735969927446)	130(0.218426468873785)	408(0.2181638051417)	5042(0.213395623529532)	23099(0.207907195243128)	7555(0.207319792616007)	260425(0.20727767731549)	81844(0.207130793401545)	285855(0.203305388217452)	55661(0.202708480797062)	57453(0.201737594065091)	6553(0.201111153892527)	6039(0.193950542750203)	94233(0.193950542750203)	283248(0.193950542750203)	150084(0.189643078127184)	407(0.189105022650064)	155(0.187760377851234)	57030(0.187216858601762)	28966(0.18480315432187)	83638(0.183639446009345)	9223(0.183035403429644)	6456(0.182010337277738)	1445(0.181024826864265)	6138(0.179902878412766)	25975(0.179408111237833)	10570(0.178434756065036)	9689(0.174600696864627)	90333(0.174320792068605)	57216(0.173926926091801)	9590(0.173864399937761)	9863(0.17318861330057)	3553(0.172636744652608)	27350(0.170516317350619)	114571(0.170231876994632)	28232(0.170231876994632)	1811(0.170231876994632)	10969(0.169856097240779)	3795(0.169557547828915)	22903(0.168985831093644)	83737(0.168231079509097)	10871(0.167711164654046)	5365(0.167239429037771)	10643(0.167150838707632)	4985(0.166533290233611)
Formononetin	5280378	10871(0.214903249746496)	84717(0.213264576436929)	7201(0.213226650996702)	23168(0.213166038751671)	154(0.206205466229638)	408(0.20319381903962)	5042(0.20220199321955)	7555(0.199113289289589)	81844(0.197786857100133)	55661(0.193981025477302)	23099(0.193443836445577)	285855(0.193109323216726)	6553(0.19166172256632)	130(0.189996882609623)	84838(0.189724832802861)	260425(0.183008814261623)	3360(0.182891496289729)	10521(0.182227467859498)	84545(0.180620897571153)	10203(0.180036577995007)	6039(0.17950894945518)	94233(0.17950894945518)	283248(0.17950894945518)	4489(0.178963827923703)	407(0.177909000603093)	4923(0.177547657506123)	57453(0.175325078239743)	23178(0.17425445803196)	3553(0.174251319471425)	1445(0.172229326412638)	155(0.170168539140332)	7200(0.170164993065694)	3795(0.168395226716513)	6901(0.167440322562628)	124739(0.167163480840598)	79672(0.167047406233372)	83737(0.164060934108447)	8727(0.160637592273879)	342574(0.160485761226342)	827(0.160274896438335)	409(0.160137878134983)	83874(0.159492064293939)	10267(0.159492057393633)	10969(0.159377024767711)	9683(0.159315912439193)	51316(0.158336530136393)	30836(0.15782776980271)	9440(0.157497842767547)
dl-Demethylcoclaurine/Higcnamine|dl－demethylcoclaurine	114840|440988	154(0.316311750760151)	84717(0.307052751072153)	7201(0.307032004759019)	23168(0.306698269672741)	408(0.299704148234344)	5042(0.280930058673013)	130(0.279514323822655)	4985(0.278772392456385)	55661(0.277855238109194)	285855(0.276493132608239)	81844(0.275067423952479)	6553(0.274693879013583)	155(0.273582920962864)	7555(0.272539878416484)	2769(0.271781748913991)	260425(0.271708289097093)	23099(0.269171436156175)	57453(0.263317535441278)	6039(0.256061309094794)	94233(0.256061309094794)	283248(0.256061309094794)	90333(0.25394642408172)	10203(0.25193917209178)	153(0.251350800328653)	4923(0.251178042484121)	84545(0.249534536869073)	407(0.249276254177974)	114571(0.247645688067057)	28232(0.247645688067057)	1811(0.247645688067057)	10871(0.241318085836703)	7200(0.24113128536561)	9368(0.239674355886219)	6579(0.238986564319497)	3553(0.238451791046377)	28966(0.231027098983869)	409(0.230396426789129)	83638(0.229652885399822)	156(0.228880010653236)	10267(0.227000165733766)	27350(0.225583477017837)	10969(0.225565949083419)	10570(0.225003498322664)	83874(0.223870432495111)	6138(0.223412431389123)	85027(0.222829148247142)	55266(0.222829148247142)	55850(0.222829148247142)
	452864	8805(0.437870903051859)	7556(0.435601253185317)	79611(0.432511659644684)	6996(0.43084691601906)	7044(0.430325517701579)	4298(0.430297096747683)	573(0.424403034584349)	5451(0.42283397311544)	9697(0.416181179064094)	51162(0.41470938741984)	5927(0.414243876828523)	6621(0.411114533157838)	9282(0.410631542827804)	84695(0.408484123877748)	6602(0.406126787442715)	57136(0.406043976312974)	11018(0.406039742481951)	83861(0.406012769330718)	55088(0.406012769330718)	55146(0.406012769330718)	10610(0.406012769330718)	79673(0.406012769330718)	23174(0.405275884600129)	143(0.40503815021156)	11108(0.400976095108451)	55769(0.399376729589617)	2354(0.398085186861782)	6595(0.395756332204919)	652991(0.39559327247532)	861(0.393458840394763)	1054(0.392965125967508)	148479(0.392827927870921)	6605(0.392735764901803)	5994(0.392627229743436)	6597(0.392624953786411)	10905(0.391454996919618)	2709(0.390682307561572)	51111(0.390421966802597)	7554(0.390041923219534)	145258(0.389973839577852)	80772(0.389873835498582)	57719(0.388480156523674)	57017(0.388437431463727)	51412(0.387989504897463)	51523(0.387212223728179)	5452(0.387121164441468)	57338(0.386551512909434)	6599(0.386251670036831)
uralene	192490	154(0.254544046925828)	84717(0.251617731918248)	7201(0.251581330571827)	23168(0.251557983979811)	408(0.246913756155257)	83874(0.228372806353192)	7555(0.228207579633275)	5042(0.227658405764931)	155(0.227233590565227)	827(0.22694837601023)	130(0.224562706995896)	23099(0.223853756465785)	81844(0.222810829849693)	55661(0.220039823883743)	260425(0.219721356092274)	285855(0.218968016594451)	6553(0.217539712197378)	3795(0.211903730072353)	10871(0.211820589064538)	57453(0.209762634775247)	90333(0.209517127716977)	4985(0.206829535632226)	114571(0.204977721439301)	28232(0.204977721439301)	1811(0.204977721439301)	407(0.204545846201955)	6039(0.204302555122975)	94233(0.204302555122975)	283248(0.204302555122975)	3553(0.200860074161284)	6579(0.200156105389846)	2769(0.199780953502713)	9368(0.199637595968826)	4489(0.199374050658309)	3360(0.195794931790712)	84838(0.195688010705126)	57030(0.195277085783213)	1445(0.195156259693967)	4842(0.194000111514798)	5744(0.192245733419217)	6456(0.192079540071988)	9590(0.191986065223646)	10203(0.187679405261081)	9863(0.187290342122598)	84545(0.186187347667418)	4923(0.185558646014723)	124739(0.184724073530584)	25975(0.184674231118465)
1,2-Dihydrotanshinquinone	105119	5743(0.254903880457745)	4537(0.254475340830097)	518(0.254475340830097)	9552(0.254475340830097)	55890(0.254317614623837)	50813(0.252269568588908)	8519(0.248759458703898)	7920(0.244714489997816)	84065(0.240810031032767)	8451(0.239763597866896)	9978(0.239742712260153)	81502(0.237515878708076)	4924(0.237154029259818)	8533(0.232342730434113)	5742(0.215384741055786)	282974(0.207252535516814)	56475(0.206116970651925)	6468(0.205658092233246)	201456(0.205567381016061)	26260(0.205232487956311)	26272(0.203123001140574)	26224(0.203070901920752)	8455(0.202477805505122)	10430(0.201779712000949)	51250(0.201305996794735)	10987(0.201190767117093)	8528(0.199105287056187)	51316(0.198891365167501)	26259(0.197737336988323)	26190(0.195794453423182)	90379(0.19474166482992)	54876(0.19474166482992)	79269(0.194412399983514)	8454(0.191234014159804)	5498(0.18968395218247)	1520(0.186997496135904)	114907(0.183965804866147)	84893(0.182971227146726)	5705(0.182094570712045)	6692(0.179853267826582)	51322(0.178739857208947)	26232(0.178366855303698)	83461(0.177156252005548)	4539(0.176875509095961)	29990(0.175839323133848)	6366(0.171262130926088)	51661(0.170994924839212)	7851(0.169262535265137)
Leucine	6106	51520(0.61119757328603)	586(0.568464546048778)	9521(0.562578278352546)	9255(0.554382257783526)	587(0.525993268805961)	51451(0.523457662644937)	3735(0.492708261192153)	5859(0.491549611188463)	88455(0.48684796080894)	5917(0.485778381253162)	7965(0.482942169003584)	4141(0.432037034088207)	1615(0.428288193808192)	4090(0.421095780653093)	2058(0.421094683849726)	51031(0.389039916437049)	4048(0.385747768113218)	55856(0.383356915883355)	283518(0.381934428807659)	386618(0.380743623007671)	7019(0.380159973254096)	23011(0.375534085338749)	54893(0.373541668291188)	9513(0.371855753057114)	7458(0.369280529394465)	9761(0.366671174881246)	10380(0.36352327290631)	3376(0.358802791498239)	64928(0.356680496956801)	1479(0.35114790126541)	55501(0.350300672493581)	56886(0.348867786076516)	1652(0.345043733876429)	5805(0.342980175250875)	3813(0.341893922610255)	1201(0.341874371564932)	124801(0.341864252927129)	7030(0.341468108108611)	51119(0.341158862813765)	252995(0.340476901676629)	23760(0.338932456231053)	84300(0.338880943760494)	10010(0.338878285945163)	55854(0.334705794000232)	84263(0.334705794000232)	51126(0.334705794000232)	51571(0.334705794000232)	131076(0.334705794000232)
Salvianolic acid D	49770696	51316(0.293298732081732)	8528(0.265215394039465)	10987(0.264620434664136)	8455(0.262813704343619)	26260(0.257382151465754)	8454(0.25711788136006)	201456(0.257029849400553)	6468(0.256583722450766)	26224(0.255036915650306)	5705(0.254937873376003)	5498(0.248874891689076)	51250(0.248037681179569)	4924(0.247812503585646)	26190(0.244785693461222)	50813(0.242647097078281)	56254(0.241767513490328)	56475(0.239966747679459)	5743(0.239155948819239)	282974(0.238220144485808)	4537(0.237392429865061)	518(0.237392429865061)	9552(0.237392429865061)	55890(0.237290394978302)	81502(0.235896983893979)	84065(0.233537513474786)	5742(0.233291671483328)	8451(0.233078268240425)	7920(0.232262301673709)	84717(0.226852623646323)	23168(0.226819960089619)	7201(0.226806244144576)	408(0.226177489144926)	8533(0.220519954851224)	83461(0.215926644101012)	10430(0.215538047101363)	84893(0.215192470907553)	112950(0.215034867439029)	154(0.212184335506599)	9978(0.210785410668528)	10871(0.20993584294727)	8519(0.20987865020559)	23099(0.2090044860574)	155(0.204936650678858)	84838(0.204935297176432)	11214(0.204266102238024)	4489(0.203875486919849)	8727(0.20249819792471)	26272(0.202423999283806)
TanshinoneⅡB	318797	157(0.163240931532421)	414060(0.143101218553842)	259173(0.143101218553842)	230(0.142765870408004)	26207(0.138572703244942)	624(0.134831188330772)	2769(0.133741860961269)	115727(0.133241568987319)	57085(0.131968429885287)	183(0.130610733926407)	525(0.130131877606066)	266747(0.128829103586405)	185(0.128124840478329)	84218(0.12766285786072)	121274(0.12638741715013)	6713(0.126133857353617)	5368(0.124955308889638)	4295(0.124233846309098)	2862(0.123997707901047)	4987(0.1238404711606)	4988(0.12381364677774)	1241(0.123220702854215)	221527(0.123134037618343)	4142(0.12231251688197)	6870(0.121835024577669)	6865(0.121835024577669)	23463(0.120978436685794)	9770(0.120892124379004)	1396(0.120544041504226)	23179(0.120380517215626)	9737(0.120087025073054)	23254(0.117834312472795)	1318(0.117019555859922)	65265(0.116149885420489)	130(0.115765406176805)	4985(0.115599045110119)	113277(0.115402315819477)	375(0.114435985449811)	84717(0.113633435365993)	7201(0.11360227557764)	23168(0.113241516708668)	124056(0.112004010552962)	54922(0.111736373674456)	5868(0.111524590828008)	90333(0.111248450738885)	186(0.110539876679556)	27035(0.110485121291365)	114571(0.110360129894159)
Liconeolignan	133867	23168(0.193380279516429)	84717(0.193335283882554)	7201(0.193297803982695)	408(0.184296763652091)	154(0.183774201678176)	5042(0.17911001931785)	81844(0.175026431474305)	130(0.174914614780762)	55661(0.174047837312663)	285855(0.17327277567164)	7555(0.172784092780665)	10871(0.171944285220309)	6553(0.171835691447973)	342574(0.170913399947531)	827(0.170457328379278)	83874(0.169359362873808)	23099(0.168487364589572)	1445(0.167663988869659)	260425(0.166347747286869)	3795(0.163735361900204)	3360(0.163678960956248)	57453(0.16026395105902)	84838(0.159273015895511)	57030(0.157944982565958)	10885(0.157717767298625)	6039(0.157672745333833)	94233(0.157672745333833)	283248(0.157672745333833)	84545(0.156212348999983)	10203(0.155805469031216)	3553(0.155670560747666)	4923(0.155310590187265)	90333(0.15430709251324)	407(0.15347898339578)	6456(0.15336258943354)	4489(0.15235441373856)	6901(0.150239208364495)	4842(0.150009723263366)	9590(0.148095289313875)	25975(0.148032189087362)	144245(0.146994045215657)	84920(0.146992811192352)	114571(0.146710619560479)	28232(0.146710619560479)	1811(0.146710619560479)	7200(0.146315246339721)	124739(0.14596099619098)	4897(0.145716738989081)
Glycyrin	480787	154(0.243039448847866)	5042(0.237268426803595)	23168(0.236618935490301)	84717(0.236586614248256)	7201(0.236547342774424)	7555(0.233145045362822)	81844(0.232416723674882)	84838(0.229627065219104)	408(0.227070191539938)	10871(0.219114878702883)	407(0.213014848837401)	55661(0.212928251404606)	6039(0.212896793898285)	94233(0.212896793898285)	283248(0.212896793898285)	285855(0.211811222460375)	23099(0.211598252658529)	260425(0.211550357993715)	6553(0.210286738450169)	130(0.209840124635953)	3360(0.208920445802612)	1445(0.207528493131178)	90333(0.206906372994117)	3553(0.206809508497888)	57453(0.204348591050662)	155(0.20175071861688)	6579(0.200095832830762)	114571(0.198247818540983)	28232(0.198247818540983)	1811(0.198247818540983)	827(0.198059906764487)	83874(0.197025361098599)	9590(0.194245802229289)	83737(0.1940619738809)	84545(0.193423027617751)	10203(0.193074627545476)	9368(0.19241017589307)	4923(0.190683604592216)	9683(0.1902445901757)	5420(0.185009370276995)	4897(0.184477631860827)	7200(0.182514857302865)	4489(0.180560624344437)	3502(0.180189596824273)	10675(0.180189596824273)	11216(0.179912628251773)	6164(0.179689927974792)	6901(0.178775352971967)
Acteoside	5281800	84717(0.259242236852814)	7201(0.259237913985666)	23168(0.258952608698503)	130(0.249881726515423)	408(0.245538004578477)	154(0.243621052242259)	5042(0.239554958483665)	23099(0.238306499300329)	260425(0.237863810753394)	7555(0.235170165197161)	81844(0.233031598852765)	57453(0.232651703788294)	285855(0.232346800675333)	55661(0.231782181368714)	6553(0.230101769657043)	150084(0.226207630264347)	155(0.223854945020741)	6039(0.22013280521139)	94233(0.22013280521139)	283248(0.22013280521139)	9223(0.218217023261901)	28966(0.218061234722559)	83638(0.216928672843942)	407(0.216709264266741)	57030(0.212196307047912)	6138(0.211478121181894)	10570(0.211206066427947)	6456(0.210645267917003)	57216(0.208285328885116)	9863(0.206246573772271)	25975(0.20445431987599)	153(0.202875656465221)	27350(0.198509108349494)	10969(0.197120791228835)	22903(0.196094341201256)	3553(0.196079823922332)	9590(0.194651842678919)	11079(0.19454242510762)	83737(0.194437151628426)	5365(0.194317445169612)	10871(0.193703604882744)	6457(0.191867327257009)	1445(0.190872161065994)	4897(0.188582354278957)	3502(0.187471580082684)	10675(0.187471580082684)	90333(0.18735034699021)	10203(0.18668779618544)
Uralenolide acid	3082612	8805(0.486157218500545)	7556(0.482059937626764)	573(0.477096745420749)	79611(0.475615492089168)	7044(0.472032055663107)	4298(0.471901571340926)	6996(0.469772981391584)	9282(0.458899410308768)	5927(0.448979082376688)	5451(0.448680051815301)	84695(0.446595415510881)	9604(0.445536606361987)	51162(0.442612263711209)	57136(0.442029690390102)	83861(0.442027988994603)	55088(0.442027988994603)	55146(0.442027988994603)	10610(0.442027988994603)	79673(0.442027988994603)	11018(0.441985935988418)	23174(0.439348052296225)	143(0.439328246133304)	11108(0.438024168443395)	6621(0.437585104024842)	5452(0.437577786561525)	442867(0.437230920860968)	442868(0.43648180238962)	9083(0.43648180238962)	54957(0.436023712747195)	9697(0.435592907887027)	3148(0.434744343911334)	2354(0.433412101396813)	1044(0.433128131923659)	7337(0.431537741725365)	7110(0.430482613315048)	6605(0.430095202865216)	27043(0.428955499401267)	24148(0.428806662051621)	6602(0.428615992285643)	6595(0.428607969741713)	861(0.427696847967626)	5994(0.426011906770345)	1050(0.425588177828623)	148479(0.425313099962444)	9063(0.425102835368067)	6599(0.422059768935836)	55769(0.42096479761291)	57719(0.42089900252066)
coryneine chloride	165581	154(0.304506521636968)	84717(0.298791447257001)	7201(0.298773594145663)	23168(0.298414836627012)	408(0.28739579228692)	155(0.284770379599438)	5042(0.275264752336915)	260425(0.27052491516187)	81844(0.269396954057248)	130(0.268025884012251)	57453(0.264491736314572)	7555(0.263158345587907)	23099(0.260407444120726)	55661(0.259029180839619)	285855(0.257812101231876)	153(0.25620293231932)	6553(0.255953934567903)	6039(0.250259290369355)	94233(0.250259290369355)	283248(0.250259290369355)	2769(0.248947174217488)	407(0.240316508679431)	90333(0.237782997884415)	28966(0.235069401960856)	114571(0.234032841432751)	28232(0.234032841432751)	1811(0.234032841432751)	3553(0.233755441735216)	83638(0.233646648504044)	57030(0.229618603545155)	9630(0.229395492495689)	10570(0.22890768300502)	6456(0.227199049918291)	5420(0.226089215552893)	6579(0.225457041715433)	10969(0.225159382629932)	9863(0.225123218569919)	4985(0.224980226173589)	9223(0.223304323684553)	9368(0.222695335623575)	27350(0.221463825574515)	57216(0.221251798825203)	83874(0.220894168014684)	22903(0.220871147692782)	3795(0.220336695204885)	25975(0.220026511718258)	5365(0.219309836935242)	827(0.216912375427222)
Salviol	11392484	6605(0.401493084558578)	117581(0.381843751140898)	10891(0.38106198315344)	5927(0.373456218217123)	80205(0.367464234265689)	27043(0.366837694572936)	84911(0.362394993669233)	29915(0.356763395013781)	9282(0.356553259073079)	5481(0.356324154027257)	6595(0.352808326886075)	51412(0.351658483737827)	57017(0.351131774144469)	57719(0.351043996034558)	26528(0.347893160326364)	53335(0.346018010125286)	9068(0.344626824489951)	440498(0.344480899356623)	56255(0.344480899356623)	9731(0.344480899356623)	146057(0.343795971162969)	92815(0.342976287857338)	2063(0.339336505614784)	10155(0.338501241149299)	6834(0.337413533651805)	9604(0.33369933515997)	84695(0.332261158991855)	64218(0.330922908961075)	2709(0.33029261939023)	1044(0.33006594759506)	57136(0.32945296415371)	83861(0.32944973054261)	55088(0.32944973054261)	55146(0.32944973054261)	10610(0.32944973054261)	79673(0.32944973054261)	11018(0.329427661633165)	10871(0.328684904521466)	79039(0.328633100678013)	11108(0.328468498938164)	54957(0.328141584644472)	143(0.32794039884138)	573(0.327558306638879)	1050(0.327022131847661)	23174(0.326914560449919)	2354(0.325313813975107)	10728(0.32482556925281)	57338(0.321693689308253)
Licocoumarone	503731	154(0.228423703375713)	5042(0.223564290549632)	10871(0.221833514913296)	84717(0.220807448044015)	23168(0.220802639699423)	7201(0.220769195509595)	7555(0.220279617782342)	81844(0.218765812998779)	84838(0.215661726734826)	408(0.211730075314782)	55661(0.202589828487089)	3360(0.201642637333572)	285855(0.201600699040861)	6553(0.200118082449567)	6039(0.199652318672593)	94233(0.199652318672593)	283248(0.199652318672593)	130(0.199412081264095)	407(0.197557827439377)	260425(0.197395587827019)	23099(0.194593727915363)	3553(0.1931044259561)	90333(0.190207606732183)	57453(0.189849217372287)	84545(0.188284616035652)	1445(0.188266994380474)	10203(0.187797317305232)	4923(0.185350372417839)	827(0.183132493946826)	83874(0.182023651181918)	155(0.181798634031083)	114571(0.181756805595496)	28232(0.181756805595496)	1811(0.181756805595496)	6579(0.18016318556321)	83737(0.178640710901174)	8727(0.178331206708349)	7200(0.177631005767164)	9368(0.176726573045906)	4489(0.175858788060378)	10969(0.175597922644093)	9590(0.174573005023607)	11214(0.174371603930813)	124739(0.171793868031643)	5420(0.171448844058042)	79672(0.171362496090183)	9440(0.170573038187931)	9683(0.169583523481651)
angoroside c	6444153	84717(0.247187003369909)	7201(0.247178361985249)	23168(0.246945427072919)	408(0.234463756892798)	154(0.23264498796091)	130(0.22785368103422)	5042(0.225513892023657)	7555(0.220387212163627)	260425(0.22013099318407)	81844(0.219157625049252)	23099(0.217048298593138)	285855(0.215016042167564)	55661(0.214357498291372)	57453(0.213929897359803)	6553(0.212836346164057)	6039(0.204210480613)	94233(0.204210480613)	283248(0.204210480613)	407(0.200481958651574)	155(0.197677904849494)	57030(0.195954645123625)	28966(0.195605617503967)	9223(0.194387887180456)	83638(0.194359215925206)	150084(0.192744205970333)	6138(0.190402232928093)	6456(0.190186448511642)	10570(0.18911579427911)	25975(0.188245243986202)	9689(0.18688655368487)	1445(0.185054031332437)	9863(0.184862932878811)	3553(0.183946623029931)	90333(0.183653593985602)	3795(0.182986842652042)	10969(0.182965333875051)	10871(0.181971914657752)	9590(0.180043681074237)	4985(0.17898257304664)	57216(0.177264671131187)	3502(0.176908004974598)	10675(0.176908004974598)	114571(0.176461934074236)	28232(0.176461934074236)	1811(0.176461934074236)	153(0.17595308732491)	22903(0.175860549046887)	83737(0.175453237317605)
Glycine	750	7862(0.71458674830974)	157739(0.706010396030706)	245806(0.702822931093993)	85345(0.70135163724149)	51442(0.693497612370113)	81693(0.686757137899277)	2653(0.684809745770481)	57489(0.673490783028318)	211(0.662104354447688)	23464(0.659609050668547)	9152(0.65929843870092)	212(0.638036035907619)	2617(0.635629339189619)	570(0.590587513372723)	1571(0.579482627082134)	84289(0.569298262252486)	10249(0.560080294293509)	51268(0.558524118639989)	2628(0.546089063058552)	27232(0.501742325483037)	2743(0.496831822986638)	2529(0.491420156473786)	189(0.486066881414951)	374659(0.485045472409418)	11147(0.485045472409418)	229(0.47876134859969)	5876(0.47651337189664)	4294(0.476383895716088)	3098(0.472930382153569)	158055(0.471925913594666)	548596(0.471889997127903)	7003(0.460671972516865)	23331(0.458634018356861)	23130(0.458634018356861)	54495(0.458634018356861)	25979(0.458408488069172)	64902(0.45767922771174)	56993(0.451600238150951)	10452(0.451600238150951)	6990(0.438671039136983)	6470(0.431736724045374)	2937(0.42065923055427)	2731(0.419569519261734)	27302(0.416051183735168)	11014(0.416051183735168)	81552(0.414902190788612)	3620(0.409344437406394)	617(0.408857153739349)
Proline	145742	8559(0.626437558426249)	442227(0.624932369205322)	285362(0.622827964003598)	9514(0.622827964003598)	5480(0.621224799908608)	1668(0.609872812272735)	79682(0.609034801859971)	79953(0.608586283829088)	2483(0.60538622160004)	9465(0.595960527216168)	9360(0.593589946409607)	10465(0.589855674021569)	84196(0.589766360796389)	27005(0.58782112854793)	58509(0.553445132386065)	410(0.541055785513646)	65109(0.535687135300965)	54458(0.534943873735463)	54920(0.534107274862985)	196513(0.530200475155028)	57673(0.530124262330149)	304(0.525150472785422)	79171(0.523017292189577)	10443(0.521757793261272)	5479(0.51900985360482)	479(0.517196810376934)	4267(0.513870531298837)	7411(0.511549682632668)	29058(0.509075446319667)	11017(0.499409499310744)	10907(0.49866974618809)	79446(0.493150204661133)	26167(0.490998189525279)	129831(0.489967702772095)	1607(0.489949023286549)	9255(0.485069315989842)	6829(0.484276432039369)	79172(0.481817266648525)	9521(0.480422299415578)	810(0.476725432009061)	7375(0.476617775856496)	2058(0.476481598857751)	3887(0.476200905096528)	5204(0.474059314801422)	201895(0.472233930304205)	5203(0.467206559154457)	25871(0.466632722443667)	158(0.464913789277534)
Salvianolic acid B|Lithospermic acid B	6441188|6451084	154(0.312125595563439)	84717(0.308133897002932)	7201(0.308095916784182)	23168(0.30774694039589)	408(0.297516839827157)	155(0.291053982048065)	5042(0.281761673262654)	130(0.28051770223111)	7555(0.276401607277642)	81844(0.275067575966852)	23099(0.273331083682301)	260425(0.269337682992238)	57453(0.265607420293593)	2769(0.262470122056632)	55661(0.262224837191516)	6039(0.259418746219399)	94233(0.259418746219399)	283248(0.259418746219399)	285855(0.259213002059033)	6553(0.256864244548573)	4985(0.252549458712575)	407(0.251787118902337)	10969(0.249184977236948)	3553(0.238598484848995)	153(0.237391311038284)	90333(0.231851359259992)	114571(0.227165032755414)	28232(0.227165032755414)	1811(0.227165032755414)	27350(0.226909314400837)	4923(0.225934534204231)	28966(0.225807542986836)	10203(0.225728511031007)	83638(0.225045650489593)	10570(0.222667473219021)	57216(0.221582146977656)	84545(0.219727244345758)	3795(0.219684118232607)	6579(0.219201820831532)	9590(0.218877662637872)	83737(0.21717547179075)	2870(0.21635850346918)	57030(0.215752280635062)	9863(0.215690501191486)	9630(0.215655002450006)	9368(0.215583488285118)	6138(0.215428250407452)	6456(0.213970350565149)
Glutamic acid	611	9255(0.568803761064889)	9521(0.558244853612381)	55856(0.51651971850352)	7019(0.515797919719805)	2058(0.51341571277512)	5198(0.508119727499706)	51031(0.507508761119595)	5859(0.507231634558787)	9141(0.500846203195077)	4048(0.498826723216575)	55527(0.495082444166092)	10555(0.4935233321544)	55818(0.489871062183438)	10137(0.48901669563447)	56929(0.48885041284685)	54764(0.488484823754117)	3735(0.487452113649147)	9761(0.487427172446257)	7965(0.487284140964373)	23011(0.487281018558069)	54962(0.486124006862344)	9962(0.484598111430258)	7458(0.483202201772761)	64429(0.483112172751471)	6507(0.482757387281771)	54826(0.482211987960613)	2744(0.482022892525347)	55191(0.481577123018581)	64928(0.481267070241121)	9648(0.480196239271186)	23247(0.478964890909121)	54790(0.478964890909121)	89796(0.478964890909121)	51327(0.478908891332877)	51751(0.478479522915037)	25831(0.477836026878951)	1496(0.477564197970645)	3883(0.477060703323982)	83955(0.47696751059091)	400966(0.476926119823186)	116143(0.476926119823186)	26127(0.475101117093374)	57464(0.47507083972471)	7871(0.475039637613465)	5917(0.474624525127735)	55501(0.474298218356806)	27436(0.473924011045362)	79751(0.473604985785823)
Darendoside A	21668724	84717(0.264854492550157)	7201(0.264850000779038)	23168(0.264706313100993)	154(0.25483003332646)	408(0.250220481631277)	5042(0.247174739150531)	130(0.2441885372235)	260425(0.243158513211846)	23099(0.241786171381532)	7555(0.240986406102006)	81844(0.240729240375764)	57453(0.236134150230813)	285855(0.232239942530167)	55661(0.231905476682745)	6553(0.230182899650551)	6039(0.225689533311977)	94233(0.225689533311977)	283248(0.225689533311977)	150084(0.223354021157317)	407(0.219526017000093)	57030(0.219482759368242)	6138(0.217681589651186)	155(0.217420411213859)	28966(0.217047243633463)	9223(0.216228264423633)	83638(0.215940548330852)	6456(0.213965213427444)	25975(0.211700288192985)	10570(0.210486925799561)	57216(0.208028501316191)	9863(0.207399273159547)	1445(0.204895956408776)	27350(0.204410691418369)	3553(0.204220800389144)	90333(0.203512644516385)	83737(0.201402585106963)	114571(0.200799046724606)	28232(0.200799046724606)	1811(0.200799046724606)	153(0.19964904253258)	22903(0.198613755736375)	9590(0.197459482539809)	3502(0.197196187392115)	10675(0.197196187392115)	5365(0.196669715833119)	9683(0.195387850138203)	6579(0.19532063798555)	827(0.195269650104269)
uracil	1174	5028(0.468969676913326)	11267(0.465301112693006)	89(0.41940291101929)	84313(0.409464250028603)	10410(0.401400218827)	116092(0.34780216928271)	10135(0.347745700100352)	51108(0.341215893554033)	79643(0.335881223598468)	84203(0.331523894463024)	55034(0.331523894463024)	64221(0.331523894463024)	128876(0.331523894463024)	79925(0.331523894463024)	643314(0.331523894463024)	23460(0.331523894463024)	10924(0.33150336894606)	11061(0.33139733206505)	714(0.330075848726678)	28916(0.328767679968069)	27128(0.326978941834274)	134(0.323940830613247)	29946(0.322591051387452)	23545(0.320920600220517)	9595(0.319925384791964)	26034(0.319925384791964)	92002(0.310592927645091)	283600(0.309849612673587)	1791(0.306593256781219)	712(0.304214462359122)	23076(0.297997677731412)	64759(0.284399490171262)	84867(0.276963316543388)	135(0.276150470225556)	758(0.275668437756926)	285025(0.275668437756926)	285753(0.275668437756926)	149473(0.275668437756926)	51072(0.275668437756926)	24144(0.275330197363177)	5141(0.274437994677528)	10612(0.273343138490126)	22861(0.270407583247069)	1809(0.267232722865569)	22891(0.266530558621632)	653509(0.265202542765367)	5139(0.262446559732853)	1356(0.261803880850197)
quercetin-3，3'-dimethyl ether	5316900	154(0.232788435783295)	23168(0.231511658357042)	84717(0.231499303078802)	7201(0.231461460041284)	408(0.223555396485302)	5042(0.212255751321235)	7555(0.20949301869653)	81844(0.207671743871036)	55661(0.206839144445028)	83874(0.206163370013301)	23099(0.20612063254927)	285855(0.205856122759073)	827(0.205521363241954)	130(0.205340492147771)	6553(0.204389631842449)	155(0.198974880092947)	1445(0.197252657536324)	260425(0.194492266008083)	90333(0.194257083498372)	10871(0.193471836461413)	84545(0.191205872949731)	10203(0.190694092512768)	4985(0.190597174940665)	4923(0.189986218289416)	407(0.189737521742081)	6039(0.189489589458435)	94233(0.189489589458435)	283248(0.189489589458435)	3795(0.188847899808618)	114571(0.188489668049196)	28232(0.188489668049196)	1811(0.188489668049196)	4547(0.188485499562545)	3360(0.187202178312217)	4489(0.186384168093995)	6579(0.186151160283046)	3553(0.185752191164186)	57453(0.184762115364611)	9368(0.183383597325623)	124739(0.182853230827089)	9590(0.180941690735909)	7200(0.180620026946847)	84838(0.180293180004881)	79672(0.17774248485486)	2769(0.177432296784664)	6901(0.175198975341)	409(0.17304978161467)	10885(0.172874503690067)
songorine	3051749	7110(0.406806482350892)	3148(0.400175636475044)	9604(0.399084623620812)	54957(0.396478584459968)	55827(0.392161131893109)	493829(0.385890734391411)	147339(0.385890734391411)	26147(0.385890734391411)	1044(0.384965434659255)	24148(0.383528618567749)	54542(0.379569964309887)	3223(0.379469096809989)	3234(0.379469096809989)	63974(0.379469096809989)	83937(0.379469096809989)	3232(0.379469096809989)	168433(0.379447495237962)	79611(0.377471720228042)	79915(0.376664585962377)	2296(0.375846285167535)	5452(0.37550009049695)	3237(0.375260971813811)	7044(0.373955152244439)	4298(0.373803567458093)	573(0.373308359931244)	5192(0.372845664184142)	6618(0.372381015397726)	23066(0.372271130447788)	54457(0.372245658631856)	136227(0.37195448132617)	222484(0.369278079418274)	54345(0.368611211617298)	1050(0.367266230590487)	5883(0.366610205215381)	135458(0.366474230318464)	255488(0.365608927688087)	27043(0.36438212335056)	442867(0.364228797699488)	442868(0.36353745507663)	9083(0.36353745507663)	79589(0.363298904626786)	152007(0.362547797104381)	4957(0.362547797104381)	29893(0.362201707376622)	8805(0.360957602678045)	6996(0.360863267768626)	7329(0.360605491161683)	64005(0.359254322766214)
Dihydrooroxylin A	177032	4547(0.395407107940307)	154(0.247544227429179)	54585(0.229254713633902)	7855(0.22685373342441)	84717(0.226522885508684)	7201(0.226492256264864)	23168(0.2261003746965)	4842(0.22380489001891)	408(0.220764706130232)	525(0.218632569608994)	2870(0.217273327365265)	130(0.214865138506274)	9630(0.214309080592981)	5042(0.21247709635559)	55661(0.211027527550206)	81844(0.210553974008573)	285855(0.210306309037355)	2769(0.20928604625595)	6553(0.208056665667662)	2862(0.203761897755262)	4295(0.203738779355255)	5368(0.203447015508042)	4987(0.203129590480418)	9737(0.202302210418607)	6870(0.202210322857645)	6865(0.202210322857645)	51573(0.201130815554559)	1396(0.200051693594382)	11202(0.199584337905598)	54663(0.199584337905598)	153(0.199467240359787)	4923(0.199446259117561)	3577(0.199116048705467)	260425(0.197631436822656)	10267(0.19703741766914)	2869(0.195360255880402)	84545(0.195302409185727)	57453(0.195237893245705)	10203(0.193568748982335)	65265(0.193366266449374)	6039(0.191384850497348)	94233(0.191384850497348)	283248(0.191384850497348)	5639(0.191332608269475)	80762(0.191332608269475)	23099(0.190114416634215)	3795(0.190002895927324)	148(0.189640217030507)
Pentacosane	12406	3652(0.23748122736933)	2976(0.225047768549501)	1139(0.220724405373989)	112(0.217890116811007)	57658(0.21148733899047)	1137(0.209624229434058)	80852(0.208562456768926)	1464(0.206540651638418)	2898(0.202590213053511)	7447(0.19676059372674)	79174(0.193814566075728)	9536(0.19168513486947)	1412(0.191326731892303)	50943(0.185017108711968)	8499(0.182693556291259)	2900(0.179357396827702)	909(0.173200931995096)	2901(0.171918566149059)	9734(0.17121557327249)	2895(0.169836025369974)	8694(0.168881698051759)	36(0.165553106052348)	5732(0.164215466442868)	721(0.162069733100881)	2891(0.161506400381199)	6336(0.1601700412765)	5731(0.1598917201135)	725(0.158403026194977)	10544(0.158377154779054)	56259(0.157898830420475)	5730(0.156827671614724)	64130(0.156531633092642)	1002(0.153175639976872)	29062(0.152301283421363)	5792(0.151430760147581)	6386(0.149444913483188)	23150(0.146680115015976)	132320(0.14321217768189)	9265(0.143132210335173)	923(0.139072169475022)	5733(0.13839490215855)	1000(0.135140720431206)	6711(0.133755852918892)	8933(0.132733727618347)	55374(0.132733727618347)	152815(0.131464738827094)	10369(0.131394065479141)	27111(0.130813073590748)
Threonine	5460797	6897(0.554231198937912)	79896(0.537452316529794)	3813(0.435227815196111)	3824(0.413735459199771)	143241(0.410903147694752)	28952(0.405175740443779)	9255(0.384826073641191)	3106(0.383609437302603)	9521(0.375584254620909)	29101(0.370526719129101)	84661(0.361706671142022)	9529(0.36149404267684)	3735(0.357348247104603)	3035(0.355764245102148)	7019(0.355636101505447)	51031(0.353952484712833)	4048(0.353949086749775)	7965(0.351366005679821)	5859(0.34699210709314)	9039(0.346553365568377)	5917(0.346342494501202)	55856(0.346311917591575)	8412(0.346187171973551)	51520(0.343937309312892)	64928(0.341482158934788)	5984(0.337730086611259)	23011(0.337633250329854)	7458(0.336019908312246)	796(0.33488465115287)	1479(0.332807786610725)	9761(0.329186141536005)	1652(0.326300623094339)	10380(0.326185946354583)	5173(0.326042199141356)	124801(0.324686079400955)	23760(0.324056364179397)	84300(0.324019619321584)	55854(0.322750472824582)	84263(0.322750472824582)	51126(0.322750472824582)	51571(0.322750472824582)	131076(0.322750472824582)	7873(0.322750472824582)	3157(0.322750472824582)	55831(0.322750472824582)	8270(0.322744755810465)	10483(0.322725571136762)	1201(0.321661065423672)
β-sitosterol|β-Sitosterol	222284	79611(0.576098745079043)	7044(0.571211007305779)	4298(0.571043670735877)	6996(0.569266234380909)	8805(0.566240184198112)	7556(0.564214170536117)	51162(0.559552453807619)	573(0.552956062457269)	5451(0.538513246682113)	5927(0.537674807230672)	6602(0.537642984128151)	5452(0.527509705974826)	6621(0.527504696733185)	9282(0.527461621111224)	84695(0.519202882212824)	9604(0.51753637549585)	6595(0.514783310272869)	83861(0.514674343005376)	55088(0.514674343005376)	55146(0.514674343005376)	10610(0.514674343005376)	79673(0.514674343005376)	57136(0.514672412513126)	11018(0.514622053469883)	11108(0.512063834388368)	23174(0.511721543958115)	442867(0.511349471630951)	143(0.511207233214263)	442868(0.510814262454821)	9083(0.510814262454821)	57719(0.509955300152284)	57017(0.509825009899273)	51412(0.508688136796727)	7337(0.507709462318325)	54957(0.505809861068864)	3148(0.505009047048695)	2354(0.502220835874371)	5994(0.502050994793057)	1044(0.501700317684798)	9063(0.501027316174094)	861(0.49957463033578)	51111(0.497613443740545)	6597(0.496290007737554)	24148(0.495152385191541)	148479(0.495133167627744)	6605(0.494282654533265)	1050(0.493217830735182)	9697(0.49229607253394)
Alanine	5950	6509(0.53274957120393)	23428(0.507652283981169)	30816(0.458927258258753)	189(0.440241238057446)	9521(0.425325101079131)	9255(0.424903207425691)	6519(0.418266047564504)	4640(0.405946607399396)	54989(0.401730577236361)	10455(0.401730577236361)	84271(0.401595646792111)	5874(0.399550755702293)	2875(0.398642746911784)	3735(0.396877458209947)	144100(0.393439962249825)	83858(0.393210372422748)	8317(0.389548144391483)	23138(0.386614692770287)	5983(0.386303346595207)	51520(0.383353107212764)	7965(0.3802418430534)	9054(0.377489477361813)	5859(0.37741118431638)	229(0.374855492763736)	9972(0.374849636499864)	7347(0.374691319757006)	5917(0.363802143073393)	7019(0.360709377931276)	94121(0.358782375786936)	9627(0.357912773083008)	6520(0.357611692411506)	4048(0.357292449202903)	51031(0.357095727868117)	8140(0.356765432411515)	9056(0.356765432411515)	56301(0.356765432411515)	79850(0.356765432411515)	34(0.356532462313644)	5718(0.356018406884254)	2686(0.35430117721409)	2058(0.352838176080807)	570(0.35265163874571)	84706(0.352039561893535)	55856(0.351116701545208)	1615(0.34900130223501)	5193(0.346334513480062)	9746(0.345763217691236)	586(0.344385206030236)
β-cubebene	93081	6996(0.487940553614534)	79611(0.479751017660358)	51162(0.476094235051655)	7044(0.475827101347427)	4298(0.475674646838924)	8805(0.470193399056266)	5452(0.469811748095092)	7556(0.465909697075502)	5451(0.460308237112015)	6602(0.456936153774189)	442867(0.449304776969108)	442868(0.448975795627393)	9083(0.448975795627393)	6621(0.447979668378187)	3148(0.446856422749504)	7337(0.446649385823678)	573(0.442845454220462)	3223(0.442332994174671)	3234(0.442332994174671)	63974(0.442332994174671)	83937(0.442332994174671)	3232(0.442332994174671)	2296(0.439153457911417)	3237(0.438218885276608)	5927(0.437002677496928)	9604(0.435050499954111)	9063(0.429851123876467)	3146(0.428907545459844)	54345(0.428146958976762)	3236(0.425805416878204)	152007(0.424782194887426)	4957(0.424782194887426)	1044(0.423702476442314)	54957(0.422544993528934)	64005(0.421421107854277)	89797(0.420416260261833)	1050(0.420316945798526)	5453(0.419477838007089)	8031(0.419409197493563)	3235(0.419303530085231)	7818(0.417511223296788)	24148(0.41418726652468)	51111(0.412681960336913)	9328(0.411735175363685)	11108(0.411515196626061)	6047(0.410551667481429)	84695(0.410194712413025)	6597(0.408249540452739)
Luteolin	5280445	84717(0.286872551840744)	7201(0.286835670941998)	23168(0.286768271347651)	154(0.284526228701085)	408(0.2785161904634)	155(0.269591813093923)	23099(0.26865976141324)	7555(0.266116875612467)	5042(0.26484458380393)	130(0.264484686398104)	55661(0.262568068309518)	285855(0.261171105363211)	81844(0.259931588734853)	6553(0.259715562821709)	260425(0.249421565359549)	10871(0.249321472708983)	407(0.244247811200817)	6039(0.240207971779512)	94233(0.240207971779512)	283248(0.240207971779512)	84545(0.238809465674728)	10203(0.238615266152444)	57453(0.23852901760839)	3553(0.23583678519202)	4489(0.23362765036116)	4923(0.232204440653084)	90333(0.228492753015238)	7200(0.227567876832099)	1445(0.2259439180164)	114571(0.225600814897162)	28232(0.225600814897162)	1811(0.225600814897162)	9590(0.224613500554235)	83737(0.222556236193924)	83874(0.222254733737561)	84838(0.221678176154245)	6579(0.221106328993472)	4897(0.219852617457159)	827(0.219027579686114)	3795(0.218625567596117)	409(0.218036646009181)	9368(0.217668747700045)	6456(0.217649486035569)	6138(0.216271683006808)	9683(0.213816102785875)	57030(0.213508543106734)	10267(0.210304301070358)	124739(0.20925296670612)
karakoline	441742	9282(0.492176995660685)	573(0.490662671679492)	9604(0.490134984719951)	54957(0.486642985356924)	9697(0.480359056909319)	27043(0.479387963892678)	5927(0.476298495413392)	24148(0.475292139870501)	6605(0.474688714750016)	1044(0.472216259578905)	79611(0.472201586194341)	8805(0.471893007694752)	84695(0.470799931110674)	7556(0.470748440385719)	7044(0.469679236787487)	4298(0.469563820877563)	57136(0.467564009237994)	83861(0.46755624949635)	55088(0.46755624949635)	55146(0.46755624949635)	10610(0.46755624949635)	79673(0.46755624949635)	11018(0.467524069673421)	143(0.465111636186414)	23174(0.464823283603814)	6595(0.464260054678174)	2354(0.463988003336051)	51162(0.463219160803279)	1050(0.461255800572396)	493829(0.460077064498355)	147339(0.460077064498355)	26147(0.460077064498355)	11108(0.458483400744398)	6996(0.457365852479862)	442867(0.456553619833006)	57719(0.456321982755614)	57017(0.456239924681937)	442868(0.45612477815267)	9083(0.45612477815267)	54542(0.455801639329378)	51412(0.455477965943337)	9063(0.454833222651535)	7110(0.454021902391136)	1054(0.453941642990792)	6618(0.453094788165034)	23066(0.453078817253461)	54457(0.453033553898056)	136227(0.452770558243007)
2-Acetylpyrrole	14079	23475(0.200078492930196)	4837(0.19770489997576)	169792(0.186340351799967)	55670(0.184101990978654)	1584(0.157623420054661)	23173(0.142359215347485)	58526(0.124940601123077)	3081(0.121482727463097)	143684(0.107000360596391)	56906(0.103255585581064)	5319(0.100126046713044)	1138(0.0938240380656851)	22926(0.0891504833712049)	6320(0.088110390319417)	84894(0.0859548562188982)	1585(0.0851363475520595)	83755(0.0836144517820277)	1438(0.0824897622355708)	84733(0.0818362143803645)	4254(0.0815899417966693)	51196(0.0806746352574659)	51684(0.080153552498365)	90594(0.0780489180104286)	5144(0.0770195289483833)	53369(0.0757599763099027)	8519(0.0747566651570678)	51360(0.0739949264964766)	54927(0.0737274974320688)	633(0.0734771712340217)	199731(0.0719095684158688)	2675(0.0718378312567608)	90427(0.0710987081284846)	4184(0.0704998851677502)	80028(0.0696666765946484)	1301(0.0696149255841108)	64096(0.069606954726172)	5623(0.069606954726172)	4902(0.0696069451880022)	55871(0.0691432629545775)	9373(0.0688275918441119)	1388(0.0687667605218395)	342574(0.0687237718132476)	1136(0.0684065158408774)	65989(0.0673459302272755)	55361(0.0671778834330541)	116092(0.0670182006064946)	2668(0.0665598248497191)	5013(0.0662394639544839)
Geniposide	107848	783(0.284415653914861)	8972(0.270409100596792)	776(0.266796967103306)	279(0.262583617384312)	5965(0.26172222286188)	2548(0.261186495190821)	6717(0.260360300302628)	779(0.249241729170455)	85365(0.247675076499953)	775(0.237185590222898)	3018(0.235712597344635)	10124(0.234090511351906)	978(0.234090511351906)	23515(0.234090511351906)	81624(0.229933701307702)	8287(0.227388184986269)	317772(0.227276095757661)	80237(0.227117098545942)	51142(0.227105955995396)	23101(0.227090555952302)	26225(0.226989996688239)	9411(0.224924195162314)	202333(0.224860210846914)	3838(0.223134578674516)	2263(0.222050874821023)	6476(0.221835984632914)	115827(0.221095058876357)	3730(0.219778719238626)	1562(0.219778719238626)	84258(0.217876548737633)	339965(0.217464224633765)	93589(0.217446249496471)	84958(0.217081392746187)	339(0.215364774685477)	5442(0.214712183535413)	10930(0.214606033729575)	85366(0.214147772085292)	311(0.212956461400208)	23411(0.211009081893594)	84699(0.209343983680555)	2975(0.208593317628414)	6210(0.206929827804776)	9583(0.205838458696211)	58478(0.205838458696211)	51106(0.205187007249208)	5653(0.204642229564703)	9637(0.204319690927958)	6773(0.203969760341232)
Glycyrol	5320083	10871(0.223686116478797)	84717(0.217280551010914)	7201(0.217242341296558)	23168(0.217230662435982)	154(0.217115289797457)	5042(0.209925354566256)	408(0.208963711472419)	7555(0.207001265278627)	81844(0.205274675274229)	84838(0.200479025729226)	55661(0.19930469588509)	285855(0.198375461257329)	6553(0.196896752163636)	130(0.195373712112417)	3360(0.19218647866229)	23099(0.191548899063073)	260425(0.19002128601305)	6039(0.186622417123166)	94233(0.186622417123166)	283248(0.186622417123166)	407(0.184348221682464)	84545(0.1834825520779)	10203(0.183090511659412)	3553(0.182637562672457)	57453(0.182546750067731)	90333(0.180840245006168)	4923(0.180742671346047)	827(0.180211386389057)	83874(0.179169206916866)	1445(0.178473981294312)	4489(0.17517941832499)	7200(0.172933380897427)	114571(0.172744689068126)	28232(0.172744689068126)	1811(0.172744689068126)	6579(0.172169566753368)	8727(0.170375217172284)	3795(0.168616635520724)	155(0.168442919562777)	342574(0.168382471479962)	10521(0.168326553992198)	4985(0.168163438307421)	9368(0.168146199939865)	83737(0.167379885730773)	11214(0.166984112336628)	6901(0.166347466932092)	124739(0.165637303492657)	10969(0.165619910795691)
Isomartynoside	6476337	84717(0.254504364335299)	7201(0.254495820968469)	23168(0.254280698119474)	408(0.242461090329376)	154(0.240791896369101)	130(0.235566818321228)	5042(0.232381616313209)	7555(0.228100121932188)	260425(0.227730625112428)	81844(0.225923555861864)	23099(0.223864543259199)	285855(0.221749886587617)	55661(0.221096984490245)	57453(0.220714183093936)	6553(0.21952611290497)	6039(0.210515450541209)	94233(0.210515450541209)	283248(0.210515450541209)	407(0.207305066977983)	6138(0.206895724140392)	155(0.204630047716645)	57030(0.202134379547356)	28966(0.201881964076477)	9223(0.201185759740473)	83638(0.200622066463926)	150084(0.19902347329061)	6456(0.197007316200936)	10570(0.195323025378187)	9689(0.194436168544337)	25975(0.194310861649471)	3795(0.192981310933103)	1445(0.192553845337944)	9863(0.192013537977882)	10969(0.190929500440746)	9590(0.190266870851562)	90333(0.189253578052164)	3553(0.189245117510519)	10871(0.186194994404236)	4985(0.184723154215886)	57216(0.184424146493835)	22903(0.183886278879325)	153(0.182823244616295)	3502(0.182467119176315)	10675(0.182467119176315)	83737(0.182257753794859)	5365(0.18224326281314)	114571(0.18206541433858)	28232(0.18206541433858)
Methyl glycyrrhetate	102135	8805(0.568286911446851)	7556(0.565870793034203)	79611(0.541421657863112)	6996(0.540198426053218)	7044(0.537793265287034)	4298(0.537646337343992)	573(0.536414806593443)	9604(0.524813270409521)	5452(0.520363294948789)	3148(0.519560681690957)	9282(0.518593397342357)	5451(0.514511247267532)	54957(0.513504546798419)	442867(0.51223121083117)	442868(0.51161340199596)	9083(0.51161340199596)	1044(0.507242022423677)	7337(0.506708402637046)	24148(0.504996627155547)	6621(0.504158415640557)	51162(0.503454165681102)	84695(0.503267947455972)	9063(0.501837317163112)	9937(0.501690559281442)	7110(0.501069696811575)	57136(0.49898016491732)	83861(0.498977090424193)	55088(0.498977090424193)	55146(0.498977090424193)	10610(0.498977090424193)	79673(0.498977090424193)	11018(0.498954122440491)	1050(0.498681129067627)	27043(0.49664855749847)	4306(0.496295222715085)	23174(0.496230116565051)	143(0.496142038237001)	3223(0.495436746229393)	3234(0.495436746229393)	63974(0.495436746229393)	83937(0.495436746229393)	3232(0.495436746229393)	55576(0.493848679241344)	11108(0.492804009360643)	7818(0.492775606046784)	3237(0.492168277581969)	9697(0.492052690970122)	2296(0.491353959839391)
DehydrotanshinoneⅡA	128994	121274(0.194416035591662)	6713(0.193810938267185)	230(0.1682728479268)	525(0.156964227587163)	414060(0.148366551560753)	259173(0.148366551560753)	26207(0.146711438947579)	57085(0.137121151164191)	185(0.136381183151785)	167838(0.134174727945923)	9751(0.133593423742356)	6843(0.133518812359976)	134957(0.132959142888651)	29091(0.132942559340173)	51573(0.131251091766187)	496(0.129871255876071)	157(0.129175034320942)	8519(0.128486983644758)	54585(0.12707679272009)	6530(0.126062386016485)	9066(0.124864925666739)	7855(0.123208806503854)	6855(0.122453410911489)	183(0.122037302025287)	8906(0.121923301636668)	6532(0.121570304793986)	6620(0.121531006806308)	2869(0.121070892003856)	1318(0.119813311906886)	6804(0.118615237301892)	5368(0.117538335200291)	4142(0.117371324017406)	23179(0.117072616533162)	11202(0.116918477411395)	54663(0.116918477411395)	4987(0.116430445644603)	84717(0.115924958870344)	7201(0.115900035639219)	23168(0.115583770848137)	51699(0.115576119477425)	4295(0.114953610948463)	2862(0.114777001123277)	266747(0.114593123648415)	115727(0.114104859364908)	6870(0.114049846758848)	6865(0.114049846758848)	9770(0.113781564775328)	221527(0.113405688249524)
Benzyl alcohol	244	167838(0.252949414361329)	9751(0.252502903389989)	6530(0.252416044278077)	134957(0.249013513962306)	29091(0.248826763541169)	496(0.247613921036454)	6843(0.246009299217207)	6804(0.24296333397464)	9066(0.239681387571973)	525(0.224303823052025)	55638(0.216882535899937)	6845(0.216605969013096)	4295(0.216474560334072)	2862(0.216279396038548)	6870(0.215163942274141)	6865(0.215163942274141)	5368(0.213943115520497)	9737(0.213749763246275)	1396(0.213479619968243)	4987(0.213313557044171)	4129(0.212752344900694)	6620(0.212281206837901)	6813(0.211208711517402)	1128(0.208223992396894)	6531(0.207683110796997)	65265(0.206952240579878)	51573(0.202626757608024)	11202(0.202538336566352)	54663(0.202538336566352)	6532(0.20155033906335)	8673(0.201467965725763)	29924(0.200537163925799)	5413(0.195867454211976)	63908(0.192563135979958)	5187(0.19206277064736)	6622(0.188105180910557)	114928(0.186046841392878)	54585(0.186040845366464)	5997(0.185346121521041)	10814(0.18486672892264)	7855(0.184314788626543)	3268(0.182002510336749)	1132(0.180166356472852)	51699(0.179553421043879)	4128(0.176419906376726)	375(0.175507682230764)	2869(0.174479282302923)	6860(0.173777342889302)
Cystine	595	6519(0.613272059143033)	11136(0.563313545638575)	9255(0.400523782383383)	9521(0.40017080035566)	23428(0.394411317471219)	3735(0.374031023791723)	6520(0.362890963090417)	51520(0.358974095421961)	8140(0.358896213775206)	9056(0.358896213775206)	56301(0.358896213775206)	79850(0.358896213775206)	5859(0.357096009183531)	23657(0.357058342593842)	7965(0.356520571554983)	2686(0.355936484700837)	570(0.355313379476542)	83862(0.350871800040807)	7019(0.34921153816139)	25890(0.347789542236711)	5917(0.342059590369711)	51031(0.341889582786698)	4048(0.34187565942885)	55856(0.335906061283737)	64928(0.333682034400299)	2058(0.329487103096796)	23011(0.328401813917086)	1615(0.325448505815954)	7458(0.324967002282647)	586(0.321719694155288)	9761(0.321375216204459)	3813(0.307687954543284)	1479(0.307277902290575)	283518(0.307219286007608)	4141(0.307130974499825)	55501(0.306844363296436)	10380(0.306244735174716)	386618(0.306000822814201)	56886(0.305506620496326)	2729(0.304856548828971)	2805(0.304344626755417)	1652(0.302662017587817)	389(0.301777147816914)	10330(0.298816259915854)	219736(0.298369436029801)	9513(0.298214264932592)	80155(0.29773903143533)	9057(0.296241585917859)
vilmorrianine	5315214	55062(0.226525567347304)	902(0.221130948492379)	7181(0.220820570737554)	493829(0.220391893750867)	147339(0.220391893750867)	26147(0.220391893750867)	27043(0.217853779368977)	25875(0.216709105871892)	221895(0.215756789684698)	126382(0.215756789684698)	56924(0.215651792615053)	1044(0.215570821446466)	168433(0.215493050392805)	573(0.21521189998739)	7905(0.214941834417525)	29028(0.213807146121062)	54542(0.213667007609786)	79447(0.212438665572943)	7272(0.211959620655218)	10463(0.210955539029439)	9604(0.210722148868951)	442867(0.210442023865947)	442868(0.210253152891722)	9083(0.210253152891722)	6942(0.209618187163505)	7182(0.209294238948101)	5698(0.209224388883983)	7494(0.209026953299591)	4435(0.207739975061644)	55629(0.207733602791839)	9439(0.207717858062853)	9937(0.207373438908089)	2314(0.207202724392862)	54957(0.207190425485618)	9208(0.207048889903213)	23788(0.206763919581506)	29931(0.206763919581506)	5458(0.206763919581506)	57541(0.206763919581506)	5992(0.206760166432817)	9355(0.206434899324668)	8805(0.206385770360389)	547(0.206335124612642)	222484(0.206210840617701)	10401(0.206191424689928)	1050(0.206080610016786)	7391(0.206052361533113)	285464(0.205927315211392)
Stigmasterol	5280794	79611(0.59710922255615)	7044(0.592480383020806)	4298(0.592331733705238)	6996(0.590061240559525)	8805(0.581994279335622)	7556(0.58017657278611)	51162(0.578837226362897)	573(0.575963567506553)	5927(0.563905425642488)	5451(0.561152242716917)	6602(0.558986450439618)	6621(0.55073577397977)	51523(0.547771960279719)	9282(0.54611564452724)	6595(0.543354848585683)	57719(0.537997841556039)	57017(0.537915529286271)	51412(0.537125316874185)	861(0.536338375134752)	84695(0.53474963532627)	5452(0.531386287644551)	83861(0.530697259875011)	55088(0.530697259875011)	55146(0.530697259875011)	10610(0.530697259875011)	79673(0.530697259875011)	57136(0.530696983261517)	11018(0.530651238429444)	23174(0.527857016138053)	143(0.527456221168194)	11108(0.525093398370248)	6605(0.518666226147286)	9604(0.518383818851247)	5994(0.518286464897359)	2354(0.517980905530443)	442867(0.514527249034322)	9697(0.514328763818997)	442868(0.514037409304351)	9083(0.514037409304351)	6597(0.512956564779546)	3148(0.512694047432722)	7337(0.512506583851388)	51111(0.511805142876364)	148479(0.510743228771229)	54957(0.507192356666579)	80772(0.506083376139783)	5189(0.503761156434937)	55769(0.503674689580996)
Licoricone	5319013	154(0.230809836376886)	5042(0.228401004386001)	84717(0.2261665828438)	23168(0.226163300080302)	7201(0.226127245363596)	7555(0.225645850726909)	81844(0.223483297805408)	408(0.216258022265293)	84838(0.214954901951925)	10871(0.210732153396766)	407(0.204849720543685)	6039(0.204245683763376)	94233(0.204245683763376)	283248(0.204245683763376)	23099(0.202876165567886)	260425(0.202472964490167)	55661(0.202134889983647)	3360(0.202053921936558)	285855(0.201100709998803)	130(0.200956070062211)	6553(0.199599930592012)	3553(0.198143112667795)	1445(0.195861610147795)	90333(0.19573958173487)	57453(0.195067909222868)	827(0.189663627398013)	6579(0.189151419579037)	83874(0.188643443417123)	155(0.188462744707332)	114571(0.187278158730868)	28232(0.187278158730868)	1811(0.187278158730868)	83737(0.185664621318785)	6901(0.185206622684612)	84545(0.183770040245292)	10203(0.183377165453433)	9590(0.182836623289001)	9368(0.181775929183936)	9683(0.181733113297903)	4489(0.181081396036809)	4923(0.180993847505074)	10643(0.179519984579551)	124739(0.176948529386208)	5420(0.176350819459524)	79672(0.176318929832199)	23178(0.175232510358396)	10521(0.173328727373477)	7200(0.173015186735906)
TanshinoneⅥ	149138	1723(0.201135593249743)	1520(0.19678033021615)	1473(0.189211225633467)	6439(0.183146575747951)	1512(0.181948818730793)	632(0.180559993477514)	121274(0.173117192856222)	6713(0.172355330164381)	2677(0.171121840761617)	2158(0.169726730064413)	51573(0.169597743550178)	11202(0.161641961437993)	54663(0.161641961437993)	8858(0.154491692854679)	230(0.152999177931289)	4537(0.152826249878218)	518(0.152826249878218)	9552(0.152826249878218)	55890(0.152196115110548)	5997(0.152162133743105)	6530(0.152102403995169)	1128(0.152087989269794)	4924(0.150514891018445)	167838(0.149931152775281)	9751(0.149478973353704)	5743(0.147752546392904)	134957(0.147323593174735)	29091(0.147183196097167)	2150(0.146781462445342)	51699(0.14548830027572)	90379(0.145475739712708)	54876(0.145475739712708)	8519(0.145158024706314)	79269(0.145086470103833)	496(0.1447118248483)	6843(0.144534267968659)	6804(0.141159429518771)	1132(0.140714087893277)	6620(0.140029617353211)	9066(0.137989970862864)	7920(0.135882625544088)	5368(0.134171243511182)	4987(0.133839123199767)	50813(0.133770749019609)	4295(0.133548257099918)	81502(0.133523553007966)	85406(0.133439041573033)	2862(0.133326385902638)
Linalool	6549	5731(0.419386530460429)	5737(0.395063518761634)	9536(0.367631083200574)	5730(0.342607618972069)	5733(0.327910179720487)	80142(0.302862884995477)	5732(0.298132657129305)	5145(0.236985567185859)	131890(0.236985567185859)	5158(0.236985567185859)	5739(0.203554103015929)	55811(0.200135572644755)	5147(0.188806252822492)	3099(0.163788877961545)	2976(0.145467895108473)	112(0.142044897755564)	1139(0.139203486930728)	57658(0.137926378570946)	3652(0.134508602458978)	1137(0.133562075106378)	79174(0.130713762512158)	6571(0.130495172657527)	7447(0.12826065258546)	1464(0.127881236536907)	3236(0.126734468922151)	6546(0.125595590144858)	9328(0.124071757049341)	23426(0.123811882029862)	6659(0.122835660446202)	5449(0.122174776047477)	9329(0.121794740602753)	51162(0.121083302447803)	10623(0.120996990415811)	80852(0.119263369874877)	3171(0.118981841010821)	5927(0.118586305628591)	267004(0.11854719993943)	3207(0.1176804706921)	112495(0.117646508057257)	493861(0.117247208686211)	10280(0.116491199972338)	3213(0.114369965997913)	25833(0.114322035761445)	4774(0.114322035761445)	6554(0.113654535351809)	8820(0.113034376307128)	80205(0.112938066537826)	6996(0.112928861449863)
Oroxylin-A Ⅴ	5320315	60626(0.172401300889622)	4586(0.162556979335272)	56667(0.162168483904532)	79623(0.162132691214376)	4583(0.161649133442896)	79695(0.161304805744734)	3567(0.160126247157689)	4923(0.153667125578489)	92285(0.152866686339665)	55612(0.151726862601773)	5619(0.151145045984414)	10267(0.150736347548572)	84545(0.15047056603246)	51573(0.150459463187346)	10203(0.147507650220505)	23506(0.146791913546418)	54585(0.146351984056307)	7855(0.145233369088335)	11202(0.145232804168159)	54663(0.145232804168159)	1677(0.144723098458377)	2769(0.144020859688788)	3577(0.143983840870155)	79009(0.143937126250949)	728(0.141280522320859)	7200(0.140723477471087)	5997(0.139868595001503)	2652(0.139849652911095)	22828(0.139755720298123)	148(0.139590631800876)	156(0.139399548808699)	4489(0.139072222698055)	55661(0.13845603193759)	170591(0.138423409468819)	285855(0.138004143624952)	27141(0.13788256111945)	409(0.137849284582945)	3594(0.137486193935636)	83539(0.137032395601707)	6553(0.13598048665286)	3973(0.135893410149002)	2767(0.135208357361145)	4842(0.135194504592739)	79020(0.134538393991617)	5257(0.133575922187964)	8493(0.1329828775435)	6645(0.132926700895278)	649(0.132866135973168)
stearic acid	5281	6649(0.245217053507761)	252839(0.23488457208606)	10516(0.234272463654999)	11226(0.232889835356684)	8884(0.230675048697627)	9536(0.223298385599932)	5730(0.212475502481816)	5732(0.206192205957182)	5274(0.204860524051363)	18(0.203110047406861)	10321(0.196663613681859)	1(0.195506070554723)	6546(0.19484112022678)	10280(0.194286862888111)	7980(0.193327762608874)	388323(0.193140652873854)	1593(0.193140652873854)	29106(0.191213466281567)	1113(0.188240563997113)	7123(0.187329208157987)	5118(0.187250566343901)	1990(0.186325237607)	10725(0.184451474836554)	55974(0.183589129549426)	3911(0.181323690071558)	5731(0.179262334645977)	51393(0.178145024096393)	6678(0.177396524166483)	6710(0.176862037276565)	2900(0.17526091200688)	7299(0.173130631497283)	1638(0.173012585051241)	51601(0.169530328437848)	730(0.167640425479343)	587(0.167284192386937)	143425(0.166871842740156)	81554(0.16526228358127)	59271(0.165192029843539)	221241(0.165192029843539)	253461(0.165192029843539)	4018(0.163019724060936)	2901(0.162240420403983)	36(0.159126288837387)	9255(0.158477540084092)	55856(0.157302899627368)	29062(0.157065374015314)	2895(0.156709947872031)	10549(0.155709757503098)
Benzyl benzoate	2345	6336(0.242508964437535)	167838(0.240699918980635)	9751(0.239891722102952)	134957(0.236861909845264)	29091(0.236593740330688)	6843(0.235102249337486)	496(0.234898317353941)	6804(0.231512297469401)	6530(0.230430971112165)	9066(0.225710717606437)	6531(0.219785720763753)	132320(0.218114107485111)	29924(0.208704034727845)	6845(0.205731070184132)	6813(0.204332256489199)	55638(0.202494918157533)	51573(0.202103803221775)	11202(0.202078405785314)	54663(0.202078405785314)	525(0.192201640850962)	5997(0.191677652966603)	3268(0.189238780474403)	6532(0.188033106206045)	1128(0.185394245954247)	8673(0.182666139542148)	54221(0.182509357205394)	63908(0.181941505925278)	5413(0.181605541555282)	51699(0.176207243759938)	6622(0.173105876696318)	6645(0.171742455266712)	4295(0.17166840891589)	2862(0.171404205651176)	6870(0.170579132877304)	6865(0.170579132877304)	5368(0.17053840448001)	4987(0.170151403179606)	2060(0.169954069498398)	6620(0.169514065978767)	9737(0.168724976164358)	1396(0.168601392133774)	10814(0.16650062023951)	54585(0.163460157222692)	6641(0.162879181544254)	7855(0.162514555757781)	114928(0.16200777260033)	65265(0.161914144276613)	54462(0.161749171902952)
cinnamic acid	444539	114907(0.225915785933048)	2563(0.225369354403872)	51304(0.222290271787449)	2570(0.221680719872)	5024(0.219838354113827)	5023(0.219838354113827)	22953(0.219405975878246)	51661(0.215235598082267)	10564(0.213237694426457)	66008(0.209981045765954)	2569(0.209068754094701)	11337(0.208976397865798)	5650(0.204397678906967)	2001(0.20437020572332)	5768(0.204030681084484)	4924(0.203816604513369)	150771(0.203598524645136)	1041(0.203598524645136)	79152(0.203598524645136)	80332(0.203598524645136)	5100(0.203598524645136)	55148(0.203598524645136)	7390(0.203598524645136)	27122(0.203598524645136)	338692(0.203598524645136)	54749(0.203598524645136)	79879(0.203598524645136)	51297(0.203598524645136)	10123(0.203598524645136)	28951(0.203540374074437)	408050(0.203228249344566)	26762(0.203196202419758)	2566(0.203086805491743)	4537(0.201322401351128)	518(0.201322401351128)	9552(0.201322401351128)	4131(0.201272174344954)	10742(0.200895112042813)	51660(0.200884078908864)	55890(0.200721234783274)	58158(0.199846405708214)	6692(0.199368256853857)	10446(0.199160246936595)	2565(0.19860077602289)	27253(0.198260843286978)	4077(0.197173891023131)	5743(0.195528306783347)	2560(0.19394936682566)
talatisamine	159891	9282(0.407368972179092)	9697(0.407143715285757)	573(0.405017750061714)	9604(0.40087047632143)	54957(0.398827520966299)	27043(0.396947626033687)	6605(0.395285321511733)	84695(0.389895068525894)	5927(0.388567386214046)	24148(0.388533462870724)	79611(0.38844664443879)	8805(0.38795935318009)	57136(0.387307132513353)	83861(0.387297423029874)	55088(0.387297423029874)	55146(0.387297423029874)	10610(0.387297423029874)	79673(0.387297423029874)	11018(0.387270247923824)	7044(0.386618498491716)	4298(0.386512385486155)	7556(0.386455922735149)	2354(0.385931527459013)	143(0.385462588253866)	1044(0.385029287934134)	23174(0.38475934275321)	1054(0.384546006782384)	6595(0.381661552139034)	493829(0.380747082457132)	147339(0.380747082457132)	26147(0.380747082457132)	51162(0.379275969128107)	11108(0.37903534123985)	54542(0.377554682644267)	1050(0.37631571526364)	442867(0.375429769705515)	442868(0.375027424427893)	9083(0.375027424427893)	9063(0.374703955791746)	168433(0.374340654783725)	148479(0.374270581916237)	222484(0.373933216913557)	6618(0.372973144255088)	23066(0.372967165770277)	54457(0.372912118082891)	64115(0.372867944602128)	57719(0.372810319786073)	57017(0.372739107070499)
oleic acid	445639	6546(0.303915062914868)	10280(0.303912910048931)	55974(0.273207367559111)	9536(0.272556638395963)	6710(0.268154455642037)	51393(0.267314778763361)	5730(0.263829702471924)	5732(0.259475558385928)	143425(0.250640988361078)	5731(0.246403596463685)	5737(0.224218914831223)	8170(0.215485410043407)	9166(0.215485410043407)	5733(0.210139830340443)	252839(0.20592596165679)	6649(0.204187762985924)	8884(0.202810127791004)	11226(0.200873568963603)	10516(0.194078636821299)	55330(0.18921630761854)	63915(0.188636460500431)	353355(0.187407981613807)	11162(0.187407981613807)	92689(0.187407981613807)	115294(0.187407981613807)	29953(0.187265338956361)	388552(0.187213417487019)	287(0.177758720352921)	5274(0.174983816138191)	7442(0.168877687502864)	2181(0.168406127458205)	10321(0.167622751510034)	18(0.167140173698117)	1(0.166456628762439)	5145(0.165690893035733)	131890(0.165690893035733)	5158(0.165690893035733)	388323(0.163851651840963)	1593(0.163851651840963)	2900(0.160752167766371)	7980(0.160271841138632)	29106(0.15932243267947)	1990(0.157319964425822)	7123(0.157222874478756)	1113(0.156674166982664)	5118(0.155864943752494)	10725(0.153137902364058)	3911(0.152899325570285)
Baicalin Ⅰ	64982	462(0.259748019848505)	3730(0.203197085463304)	1562(0.203197085463304)	5653(0.198546696158665)	170591(0.178460364949316)	4586(0.169425107531115)	56667(0.168923644823607)	79623(0.168907492762247)	4583(0.168780121373108)	79695(0.168588202870975)	3567(0.165632781361336)	26260(0.161107860558257)	201456(0.160976741392376)	6468(0.160456501363771)	6286(0.159141222871097)	282974(0.1590716645421)	56475(0.159070138957446)	8475(0.157098112548133)	26224(0.15597802567926)	83461(0.154191648360523)	8454(0.15348144418503)	6404(0.152762418042121)	26190(0.151670154497614)	26272(0.148798399476822)	1429(0.147219888556853)	51399(0.146752933425254)	1446(0.144934603078251)	84893(0.144624364028771)	6403(0.144491760591092)	6383(0.14244389186987)	3006(0.141171210260023)	7920(0.136478644314225)	4924(0.134505737349762)	84065(0.133766304567092)	350(0.13352707451331)	4537(0.133426345512538)	518(0.133426345512538)	9552(0.133426345512538)	50813(0.133283041192406)	84958(0.133262756205257)	55890(0.133130652601186)	5743(0.132553865706581)	81502(0.132030302054885)	8451(0.13165539415925)	5897(0.131516095041277)	26259(0.130590035908004)	1409(0.128896417328504)	23099(0.128043616005804)
Campesterol	173183	8805(0.610134418907624)	79611(0.609896803696626)	6996(0.608401917582776)	7556(0.607399509180306)	7044(0.605642002172436)	4298(0.605500705395311)	573(0.60008640661415)	51162(0.592680658267167)	5451(0.580199049979881)	5927(0.578113838718993)	6602(0.57500802389471)	9282(0.572361286450305)	6621(0.567525937843202)	5452(0.565496588594046)	9604(0.558887324281076)	84695(0.556809907121886)	57136(0.552790670634205)	83861(0.552787626481194)	55088(0.552787626481194)	55146(0.552787626481194)	10610(0.552787626481194)	79673(0.552787626481194)	11018(0.552748726986995)	442867(0.55063206898809)	442868(0.550141049670811)	9083(0.550141049670811)	23174(0.549977143654731)	143(0.549635444796904)	3148(0.548482376205166)	11108(0.547772417624497)	7337(0.547292889804411)	54957(0.547262711940023)	6595(0.546579404696752)	1044(0.544293179158234)	2354(0.539363561151834)	24148(0.538869916437383)	9063(0.538591989177287)	1050(0.538217088765048)	51111(0.537089802153025)	57719(0.53670292463537)	57017(0.53667302534016)	51412(0.536270429885712)	9697(0.53545209380756)	148479(0.532376455241261)	6605(0.531304770162107)	5994(0.531242052398687)	6597(0.529164763929175)	57338(0.528761466845439)
L-Asparagine	6267	9521(0.473293580254667)	9255(0.469277896106232)	3735(0.449222029412234)	7965(0.43191995790476)	5859(0.413714711823716)	51520(0.413061897433315)	1615(0.411102792297834)	5917(0.40024210900573)	7019(0.399919316516124)	51031(0.398941521851164)	4048(0.397118595354172)	55856(0.390346262454384)	2058(0.38807903523363)	440(0.38213356657694)	23011(0.380463618572202)	7458(0.377848801394075)	64928(0.37408560832199)	9761(0.373592217756558)	83862(0.373428934819275)	25890(0.369269074849107)	3813(0.365718834888781)	4141(0.36008888459954)	10380(0.36000302242142)	583(0.357582533754347)	54826(0.356203539110219)	1479(0.352482741056182)	51327(0.351896278890031)	55501(0.351682307405695)	51751(0.351548542514932)	56886(0.350585740897461)	1652(0.350257841616322)	400966(0.349876381864732)	116143(0.349876381864732)	586(0.349518824822137)	10330(0.347400267143012)	389(0.343771622926209)	3824(0.341817597786578)	23428(0.340270407398329)	493856(0.340175024387079)	6161(0.339818426892362)	1201(0.338199351454041)	51119(0.337528840911258)	30816(0.335917411238788)	55854(0.335746070022118)	84263(0.335746070022118)	51126(0.335746070022118)	51571(0.335746070022118)	131076(0.335746070022118)
Scropolioside A	6449923	5348(0.154211172493116)	3730(0.150743815692194)	1562(0.150743815692194)	53822(0.148378884950845)	79002(0.145129499188962)	23178(0.145057952235124)	477(0.144996244814154)	6217(0.144679798804362)	6838(0.142702975189484)	3608(0.140492994624569)	55240(0.139832690306487)	3006(0.138877392194608)	8972(0.138314741981776)	134353(0.137602957381591)	2091(0.137064549312557)	476(0.136946514038689)	9620(0.135399300424958)	2629(0.135399300424958)	8493(0.134451894846864)	2548(0.134310467758333)	5660(0.133036260561464)	3594(0.132698601891385)	279(0.132649820722822)	10291(0.132442587841465)	5257(0.132259561282322)	7155(0.132115907742437)	220988(0.130753550427091)	6136(0.129473498151811)	3797(0.129030112153)	9805(0.127828490596742)	462(0.127805600767833)	1677(0.127149513120835)	6427(0.127097166996849)	6230(0.126099762055214)	7178(0.126088856953178)	10992(0.126036841333297)	79009(0.125802535031432)	22944(0.125139442450349)	6137(0.125117031691812)	8337(0.124898076708132)	1105(0.124584814686417)	22828(0.124578230620534)	6634(0.124206980818651)	51209(0.123810991822417)	2146(0.123754346171509)	3020(0.123211526576906)	6238(0.123178361537034)	4437(0.122684420636686)
Methyl tanshinonate	624381	1636(0.197034706378415)	186(0.173671333077997)	624(0.161952000136725)	1312(0.137967837016679)	525(0.137290766494607)	5368(0.135817856169969)	4295(0.135561087875094)	2862(0.13519614250923)	2869(0.135149299319698)	4987(0.134412520265577)	6870(0.132390349771444)	6865(0.132390349771444)	1396(0.131907587561945)	6843(0.131864497204832)	29091(0.131302809710584)	134957(0.131221252050945)	9737(0.129768989289462)	167838(0.129194698732572)	9751(0.128773537067146)	65265(0.126403346007019)	9066(0.125827538907331)	496(0.124488828391477)	414060(0.124293652857046)	259173(0.124293652857046)	5090(0.123591377871826)	57085(0.123376948557751)	26207(0.122773462993797)	157(0.122643558551637)	80835(0.122379249650192)	80834(0.122379249650184)	83756(0.122379249650183)	6620(0.121290285784294)	5187(0.120774556407842)	115727(0.12029121782276)	2769(0.119675230042783)	1128(0.118263213721449)	6532(0.116456757782456)	183(0.116156645996269)	221527(0.115405693298837)	6804(0.114678028473207)	23179(0.114046104627682)	4142(0.112003128655447)	6530(0.111854548118899)	266747(0.110059428853712)	84725(0.109920561554059)	113277(0.109489232742921)	9770(0.109182365706149)	1241(0.108399457471211)
Corynine	8969	3351(0.254016619143023)	3352(0.251910725139115)	654364(0.223736757842376)	26091(0.223521578012573)	55008(0.223491740541134)	4831(0.22327595435404)	3350(0.222980587216211)	1901(0.218554279902858)	1903(0.1854137710454)	6571(0.185379596909015)	2849(0.185373907597887)	60626(0.183262821749285)	5510(0.17913607693862)	92285(0.165118985618247)	373156(0.160839513668731)	482(0.152116523705332)	58157(0.151486515212212)	79020(0.145845130643026)	59339(0.14553147571736)	3358(0.144069366184151)	8490(0.142899804352795)	2773(0.14142711087648)	64407(0.141034882178626)	8777(0.13972958716555)	9568(0.136543156943886)	2770(0.136410443733346)	1814(0.135551013633832)	152(0.13520905526916)	79937(0.132982267679677)	4833(0.132265555511648)	2825(0.132078679162301)	2865(0.13124594412985)	29899(0.131025967474111)	7280(0.129829843328787)	151(0.128685384628254)	2867(0.125921720689095)	440145(0.124722918496617)	114791(0.124647853393048)	85378(0.124647853393048)	63910(0.124541048039097)	91782(0.124322600380309)	1452(0.123062657231842)	375686(0.122544279642148)	23566(0.122376889688534)	7122(0.122124229079911)	53637(0.122011897160441)	81537(0.121996465080888)	643(0.121994609393839)
Hypaconitine	23337	79915(0.264606718622337)	7272(0.259687161024205)	5883(0.256623745206134)	135458(0.252948792443818)	50487(0.250653333364137)	573(0.245879241767728)	7110(0.245741291152223)	81027(0.245545925568261)	7041(0.244434493091713)	6554(0.244394672135829)	119710(0.243909002699885)	4775(0.241503200612896)	6871(0.240488263559605)	1408(0.240030640183534)	55827(0.239962942344057)	9604(0.237612149083645)	23215(0.237193211071661)	915(0.237175398985513)	9669(0.235998091713276)	64061(0.235229689766007)	4857(0.235116462373957)	6756(0.234841826292525)	8028(0.23439251883096)	5087(0.234276933498907)	158399(0.233752694196969)	3175(0.233596275680756)	11319(0.233325790140377)	5536(0.232775798203729)	54957(0.232356717339501)	23469(0.232321330294343)	6601(0.232271858809426)	3211(0.231063465062954)	3460(0.230986138532903)	1044(0.230099444424959)	6249(0.229779117220669)	7267(0.229226275108292)	1059(0.229002939575992)	225689(0.228463294268344)	1780(0.227802960601337)	5799(0.227248173195149)	6834(0.226190414533681)	3218(0.226162261427827)	55617(0.226021548781998)	27043(0.225804521888869)	9716(0.225151913073142)	9729(0.225028514961557)	57282(0.225008706389603)	481(0.224887556957653)
napellonine	120706	573(0.482800246116401)	5927(0.482723718861315)	6605(0.480030324544114)	119710(0.479996057782855)	6554(0.478062565390768)	6601(0.477812375587669)	9282(0.475567477074745)	9604(0.475446119476626)	6595(0.474138335448851)	54957(0.474028613355472)	4857(0.469857303035224)	57719(0.467720563880263)	57017(0.467593066250789)	7110(0.467448681775005)	51412(0.466491475636686)	27043(0.463321834534287)	24148(0.461598613979702)	55827(0.46135302912882)	9697(0.459863236166984)	1044(0.459288183537885)	51162(0.457769672464592)	84695(0.456169260765725)	57282(0.453423074337347)	57136(0.452864291477486)	83861(0.452855054143906)	55088(0.452855054143906)	55146(0.452855054143906)	10610(0.452855054143906)	79673(0.452855054143906)	11018(0.45282507156297)	79611(0.451145411766556)	143(0.450604783197244)	23174(0.45011552725227)	2354(0.449012910719182)	493829(0.448944640178981)	147339(0.448944640178981)	26147(0.448944640178981)	7044(0.448531799572789)	4298(0.448420144542349)	1050(0.448386238770682)	29893(0.448310013520653)	8028(0.448051996386512)	6756(0.447869074718262)	8805(0.447106571997949)	6598(0.446629106376134)	6602(0.446080958134234)	7556(0.445517461680671)	54542(0.445095698038933)
2’，5，6’，7-Tetrahydroxyflavonc Ⅻ	11095	4547(0.427268752219286)	154(0.357197767842837)	84717(0.337149891711218)	7201(0.337118148725427)	23168(0.336811077332579)	5042(0.331403358976995)	155(0.33087196876465)	408(0.327328287260472)	81844(0.325162564565947)	7555(0.323001062128988)	260425(0.316236897486747)	57453(0.308669274556442)	130(0.305670664449633)	6039(0.304568658029804)	94233(0.304568658029804)	283248(0.304568658029804)	23099(0.300586243756251)	55661(0.298517415562382)	285855(0.297110096181114)	407(0.296205805372725)	6553(0.295362640510974)	3553(0.288050074852707)	153(0.2730900699291)	9590(0.272955757920716)	57216(0.26680967025133)	10969(0.264602667550688)	27350(0.263077915279034)	90333(0.263053506590893)	22903(0.262128884717755)	5365(0.260763027784923)	114571(0.259882450459756)	28232(0.259882450459756)	1811(0.259882450459756)	5420(0.258781355842804)	28966(0.257366981977504)	3645(0.256528355569974)	83737(0.256510940236452)	83638(0.256245561611077)	10203(0.256204879610083)	6138(0.25603215653805)	4897(0.256002165208367)	3360(0.255047196050855)	1445(0.254629004092856)	84545(0.253573447927388)	3795(0.253160301381991)	6456(0.253032661597045)	9863(0.252676599293908)	57030(0.252522313082322)
Ornithine	389	3735(0.526293332937281)	9521(0.491965042641431)	4947(0.490277640190957)	384(0.490052439320594)	126638(0.485801313893095)	79613(0.484801089125515)	383(0.483870980278613)	9255(0.483731858472156)	10201(0.48292193888711)	483(0.478126016206812)	440026(0.478126016206812)	449520(0.473738029363333)	79893(0.473738029363333)	199720(0.472862545700775)	51686(0.472233035140749)	5009(0.450179233134847)	1828(0.441551513746448)	4946(0.440188127638286)	5859(0.426951328030838)	8689(0.425748626969603)	1607(0.419636382077607)	26167(0.41774623633774)	51520(0.415995519679932)	5917(0.412306225167084)	7965(0.411573247091327)	54726(0.404793898736071)	2717(0.400024140688466)	51068(0.388716896390189)	2058(0.384293822669438)	10534(0.38420997745459)	3881(0.376852106863989)	3884(0.375254953798086)	4953(0.374975935153945)	26292(0.366622656191363)	4141(0.365343104510413)	2628(0.358783799169064)	1615(0.357271516675072)	55856(0.352939965502871)	51031(0.349700687690853)	11156(0.345488833282445)	4048(0.345473493205213)	7019(0.342184138793347)	26046(0.34173640940576)	283518(0.333266478141947)	23011(0.33275495628948)	4340(0.332076926209125)	388697(0.332072826141646)	7458(0.331727183540952)
Leucosceptoside A	6476334	84717(0.231286773342183)	7201(0.231276154857114)	23168(0.231087684367795)	154(0.219735969927446)	130(0.218426468873785)	408(0.2181638051417)	5042(0.213395623529532)	23099(0.207907195243128)	7555(0.207319792616007)	260425(0.20727767731549)	81844(0.207130793401545)	285855(0.203305388217452)	55661(0.202708480797062)	57453(0.201737594065091)	6553(0.201111153892527)	6039(0.193950542750203)	94233(0.193950542750203)	283248(0.193950542750203)	150084(0.189643078127184)	407(0.189105022650064)	155(0.187760377851234)	57030(0.187216858601762)	28966(0.18480315432187)	83638(0.183639446009345)	9223(0.183035403429644)	6456(0.182010337277738)	1445(0.181024826864265)	6138(0.179902878412766)	25975(0.179408111237833)	10570(0.178434756065036)	9689(0.174600696864627)	90333(0.174320792068605)	57216(0.173926926091801)	9590(0.173864399937761)	9863(0.17318861330057)	3553(0.172636744652608)	27350(0.170516317350619)	114571(0.170231876994632)	28232(0.170231876994632)	1811(0.170231876994632)	10969(0.169856097240779)	3795(0.169557547828915)	22903(0.168985831093644)	83737(0.168231079509097)	10871(0.167711164654046)	5365(0.167239429037771)	10643(0.167150838707632)	4985(0.166533290233611)
1,1’-Bicyclohexyl	7094	56654(0.19165444204323)	84078(0.188101178303865)	1374(0.165613258253632)	1535(0.160433209387361)	54891(0.150495155124205)	79611(0.146643941831088)	51523(0.145141548031845)	7044(0.143480780219478)	5994(0.143473531176377)	4298(0.143337827360786)	7227(0.13867765529791)	2928(0.13867765529791)	7195(0.138640849432339)	84901(0.137859706830869)	861(0.136782609875818)	1412(0.136763437251897)	23710(0.136296583524614)	6047(0.135496242869222)	6594(0.134980656215126)	54345(0.134632798202762)	1414(0.132884678211011)	1413(0.132280005018461)	2029(0.131905470534424)	8372(0.131829106083211)	6597(0.131547148660484)	7181(0.131276887189997)	3236(0.130717285133033)	1022(0.130683807033079)	2296(0.130628286738809)	10401(0.129428968778804)	463(0.128766241021587)	6582(0.128603763415741)	11108(0.128450950549598)	55536(0.128447003570823)	79812(0.128447003570823)	9031(0.128229653470095)	29106(0.127993072859401)	8295(0.127851433238569)	29089(0.12773046868265)	91614(0.127064778010318)	6833(0.127024163621781)	3155(0.127002450627446)	7556(0.12687982409848)	51162(0.126581936896235)	84695(0.126561675539882)	57719(0.126102383675914)	5547(0.126082744037887)	57733(0.12581269547757)
5-Hydroxymethyl furfural	237332	8566(0.598737654222452)	501(0.232342427662769)	122011(0.178865699536611)	1053(0.1691323804732)	283987(0.161895492951201)	875(0.157907392544486)	221442(0.156252150011973)	55156(0.134171315975782)	79634(0.134171315975782)	138151(0.134171315975782)	26009(0.134171315975782)	1527(0.134171315975782)	7802(0.133914761775263)	7360(0.124825831925007)	63917(0.123449492104215)	10087(0.121689263250901)	9400(0.120230593652896)	51534(0.119498659689682)	10999(0.111674342934331)	29968(0.110321714327195)	3574(0.109480257740671)	400745(0.109441088136254)	4585(0.109441088136254)	2059(0.107957971696582)	4102(0.107415692720646)	25763(0.107415692720646)	117157(0.104095109508657)	2845(0.100619635273129)	8263(0.0985263011354241)	5286(0.0967287275674247)	10096(0.0954337631339236)	54206(0.0943399944542839)	386618(0.0941222935413061)	283518(0.0937907600109525)	64285(0.0920306282934905)	5042(0.0905345560103295)	10097(0.0897272258196489)	7039(0.0892863963128274)	81844(0.0890472429946177)	3270(0.0890155658909459)	64834(0.0889382507349385)	9180(0.0872342879058488)	55(0.087131003586322)	90134(0.0868580565412272)	10345(0.0864134962092296)	9788(0.0862260626034105)	252995(0.0859630428297321)	6451(0.0843456104643141)
Methyl rosmarinate|Monomethyl lithospermate	6479915|5319877	84717(0.302231425516028)	7201(0.302192839400306)	154(0.302131004840146)	23168(0.301852701313752)	408(0.291892033546516)	155(0.280088871000951)	130(0.276379138689055)	5042(0.271230483750643)	23099(0.26717069833305)	7555(0.265487316449084)	81844(0.264726559539248)	260425(0.262118394974965)	2769(0.260961118760806)	57453(0.258780748619659)	55661(0.257915752706401)	285855(0.25499315674009)	6553(0.252645629554379)	4985(0.252078813541798)	6039(0.249185036397586)	94233(0.249185036397586)	283248(0.249185036397586)	407(0.2415232638414)	10969(0.241003341582228)	153(0.234659042863807)	3553(0.22929890821812)	90333(0.225193817839061)	28966(0.223786310309748)	83638(0.222974413224341)	4923(0.221435815098143)	10203(0.221321013836935)	10570(0.220616415241492)	114571(0.22026403046633)	28232(0.22026403046633)	1811(0.22026403046633)	27350(0.217370926979559)	83737(0.216492150120045)	84545(0.215448608770828)	57216(0.214558224990595)	3795(0.213938892366341)	57030(0.213874830860735)	5639(0.213236979653379)	80762(0.213236979653379)	9863(0.212837459345554)	6579(0.212336039985517)	6456(0.212295440737466)	9630(0.210633234091575)	4734(0.210508668003671)	9683(0.210333033811288)
Sugiol	94162	2709(0.267310943066251)	6594(0.263862442916957)	10025(0.263012389356073)	7195(0.262661513049353)	6605(0.262294268786197)	9968(0.261763542025406)	9031(0.25951609058669)	8805(0.259508135466381)	9282(0.257858576686614)	9969(0.25783441953395)	5469(0.257314103272588)	10001(0.25694251669832)	7556(0.256196181378996)	5927(0.25535424278567)	63925(0.255297029724161)	6097(0.254705584383875)	8820(0.254052381594344)	10891(0.252650980488165)	1269(0.251304510162686)	23054(0.251064328007202)	91614(0.250132996752532)	3155(0.250038302224612)	9412(0.248950990050384)	8295(0.248029582400801)	9611(0.247684063302226)	9862(0.246298649091433)	27043(0.245994470095147)	6996(0.245055891839431)	84838(0.24475463003769)	84695(0.244233643452096)	2959(0.243161096181368)	11108(0.242145164806918)	51162(0.241729243794387)	404672(0.241242226081981)	2967(0.241242226081981)	55062(0.241072099533704)	83861(0.241052287757983)	55088(0.241052287757983)	55146(0.241052287757983)	10610(0.241052287757983)	79673(0.241052287757983)	57136(0.241032855054744)	11018(0.240994774703075)	2966(0.240866662081094)	6595(0.239437711098998)	23174(0.238700159578726)	573(0.238588366040804)	8648(0.238460319677981)
dimethoxyflavone	88881	170591(0.218151495353062)	4586(0.192167584407111)	56667(0.191694620040973)	79623(0.191676821211422)	4583(0.191231055451354)	79695(0.190332771112494)	3567(0.18971252451292)	6286(0.175109269948628)	11202(0.157758505007338)	54663(0.157758505007338)	51573(0.156272115330736)	51699(0.148503674664586)	5997(0.145897021096779)	54585(0.141981171444831)	7412(0.140830027132068)	7855(0.140306296794875)	359948(0.135887261349531)	6361(0.133943693438847)	1409(0.132488151464759)	2652(0.130760556798553)	27352(0.13058358437093)	9783(0.130304315671032)	10863(0.130030059876447)	53840(0.12975622388924)	23609(0.129241996286424)	60626(0.128439947142159)	79577(0.126766242611744)	144245(0.126635401763874)	84920(0.126633674242554)	10052(0.126187954991876)	2767(0.125856686767979)	6645(0.124775100572802)	6813(0.123337172130329)	9992(0.122783541025364)	6641(0.121604492032109)	3577(0.121362243617008)	51715(0.121286495523759)	58497(0.120253825110593)	55738(0.119648827863881)	4883(0.119596707639729)	148(0.118453745909402)	92285(0.117853941093484)	5903(0.117492370340173)	399(0.117250334015721)	1429(0.116105891244167)	55612(0.115892949451422)	649(0.115622715119926)	3754(0.115467410147894)
Phenylalanine	994	6898(0.412721196167572)	28908(0.406568484141538)	6123(0.383312271301312)	1662(0.383312271301312)	10667(0.378471543390018)	29969(0.3740356499327)	23428(0.347900387636968)	7054(0.321952704834766)	55833(0.27516638127299)	22913(0.268685215986599)	8565(0.267944101124067)	134430(0.267814559620153)	103910(0.26765975577159)	8634(0.263180749978582)	6519(0.262732210034813)	23603(0.259675636509761)	25871(0.259197927260896)	85015(0.255723586849997)	8788(0.254114818533141)	200916(0.25047163705347)	29766(0.249573162783001)	124402(0.239365559661993)	29889(0.23835391338526)	7730(0.238330207365532)	57407(0.2369298626541)	84255(0.2369298626541)	113000(0.2369298626541)	84154(0.235479636696585)	24138(0.233794256453754)	55133(0.233244933136989)	8140(0.222718787703099)	9056(0.222718787703099)	56301(0.222718787703099)	79850(0.222718787703099)	2686(0.222273743723932)	51663(0.217935760485866)	112950(0.216932403228549)	6520(0.215791559472686)	9521(0.212747769766775)	9104(0.21113052817133)	113179(0.207218542867853)	570(0.207044431939196)	8638(0.206534014660503)	29997(0.204157148607794)	5053(0.204062708222817)	7342(0.202345654100376)	2302(0.196358374925714)	55588(0.194721645102228)
MiltiononeⅠ、Ⅱ|MiltiononeⅠ	5319835	1723(0.285426817673715)	632(0.232120722115788)	1473(0.226650441857695)	6439(0.225076980836365)	1512(0.224841967476387)	2677(0.217831315120731)	1520(0.208093397178619)	2158(0.206496341485517)	10972(0.181903766612926)	8858(0.174305759473716)	5624(0.164485035208492)	1509(0.145726173715082)	2157(0.13767991803497)	11093(0.135172122170548)	5627(0.132075417996221)	10544(0.129896490524045)	2150(0.129154278261411)	6530(0.12854984150962)	22915(0.12643535280261)	91966(0.123998890655342)	2153(0.122485070398316)	725(0.122353134873493)	2147(0.121829953942863)	167838(0.120541705751021)	9751(0.120173774707945)	2159(0.118092829391597)	134957(0.117259068781837)	29091(0.117130836900207)	3249(0.116564502047136)	4502(0.116289945894723)	496(0.116253245219597)	10814(0.115759096773492)	6843(0.11558427602681)	7056(0.11517557756718)	6804(0.114065418630245)	4537(0.112942341839825)	518(0.112942341839825)	9552(0.112942341839825)	55890(0.112418142707596)	721(0.112158302722844)	9002(0.111331070690766)	9066(0.111160183069432)	55851(0.111043093300953)	3083(0.110848859647717)	8574(0.110644565448662)	6531(0.110305898398571)	5743(0.110270206683564)	5271(0.109606929958159)
inositol	892	8972(0.285188225214908)	3018(0.280471596744782)	84103(0.269837877663053)	2975(0.268448585471525)	50511(0.267701136351668)	85366(0.267099295413113)	5442(0.266882035658903)	6210(0.255274058895708)	6193(0.254870720019388)	51106(0.25329181793989)	9583(0.251895031357264)	58478(0.251895031357264)	6232(0.249785243897948)	127703(0.247780708288018)	8099(0.24480872891033)	131474(0.243600304085674)	10734(0.239171094728685)	9985(0.239134449685418)	26521(0.238179742680006)	5937(0.233392006056973)	6240(0.230649183408269)	339965(0.229399080752987)	9099(0.228942258130158)	3032(0.227294648752521)	51426(0.226485697528703)	10946(0.226131816924665)	9768(0.225827763616072)	11196(0.225782205480131)	11201(0.225753500340005)	10158(0.224095450415966)	8243(0.222330932452358)	84134(0.222102171066115)	57553(0.222102171066115)	84953(0.222102171066115)	276(0.2213015617872)	4928(0.220190858957758)	5422(0.219757860848773)	9414(0.219066409458497)	1140(0.21892185177064)	81876(0.218894155565519)	10980(0.218581213285984)	5111(0.217344324192489)	81557(0.216787448597367)	11101(0.214622225149362)	150084(0.214603291279638)	6138(0.211781919505391)	7353(0.211499714068185)	8480(0.209329311431792)
Uralenic	10114	8805(0.572102359299949)	7556(0.570541213482596)	79611(0.552359178592769)	6996(0.551847578016487)	7044(0.549698634968208)	4298(0.549630367588287)	573(0.537982532892867)	9282(0.531198990490838)	5451(0.529091005911821)	5452(0.520030501639918)	6621(0.519165919127341)	9604(0.517181636276934)	84695(0.516572576004326)	11018(0.513586207621448)	57136(0.513583605507888)	83861(0.513547489106921)	55088(0.513547489106921)	55146(0.513547489106921)	10610(0.513547489106921)	79673(0.513547489106921)	9697(0.513494570987158)	51162(0.513284898465109)	23174(0.512586144159794)	442867(0.510740649647143)	143(0.510739394116309)	442868(0.510327527454365)	9083(0.510327527454365)	7337(0.509868453894259)	3148(0.509362739074235)	9063(0.508414610929767)	54957(0.507678815679881)	11108(0.507458711703677)	24148(0.505328383265678)	6602(0.504698660578466)	2354(0.504592467023496)	51111(0.504053828644083)	7818(0.502232792333176)	1044(0.498384772506841)	148479(0.497558969118873)	55769(0.497185932301952)	861(0.496509133041344)	5927(0.4963333561793)	27043(0.496166721006469)	2709(0.494636957761161)	1050(0.494365150769088)	80772(0.493895771541213)	6597(0.491478642226347)	89797(0.490522087401172)
Furfuryl alcohol	7361	8566(0.307822031194199)	6557(0.236041123252931)	501(0.185255039392848)	285613(0.151388228061247)	9381(0.151273610685573)	84957(0.151273602128413)	768211(0.151266333794978)	9943(0.149214653696075)	27347(0.147959913501313)	122011(0.142359101730133)	1053(0.134253947658679)	90134(0.132961591801206)	283987(0.128916673929214)	875(0.125769550914545)	221442(0.124444482833254)	55156(0.104702992336417)	79634(0.104702992336417)	138151(0.104702992336417)	26009(0.104702992336417)	1527(0.104702992336417)	7802(0.104499418000494)	9625(0.101019512973039)	10087(0.099675996219591)	7360(0.0978406461496257)	9400(0.0950971340913607)	51534(0.0945942653128393)	63917(0.0911532760315368)	29968(0.0873684124092973)	3574(0.0872729704833587)	10999(0.0870816458084949)	2059(0.0848925429279101)	4102(0.0833067596994075)	25763(0.0833067596994075)	400745(0.080277942124929)	4585(0.080277942124929)	2845(0.0793517637180534)	8263(0.0763030678611821)	117157(0.0760659291431664)	386618(0.0757119832678009)	283518(0.0754411131911813)	64834(0.0705841346855785)	5286(0.0704565346081489)	10096(0.069296320776288)	5042(0.0687978792873044)	54206(0.0685541078389738)	252995(0.068443042381196)	64285(0.068010738965166)	81844(0.0676131647309565)
2-Isopropyl-8-methy-phenanthrene-3,4-dione		4537(0.236192558240251)	518(0.236192558240251)	9552(0.236192558240251)	55890(0.235617967847204)	4924(0.232950176944209)	5743(0.231659346283411)	50813(0.223300176887071)	7920(0.220592613383601)	114907(0.212576834929533)	8451(0.212197625416194)	81502(0.209826124333863)	5742(0.206796306995625)	84065(0.204492048025003)	9978(0.201917331091459)	8533(0.201822041420253)	121274(0.201756216482772)	6713(0.201254329027579)	57085(0.18588901328173)	90379(0.182302196514753)	54876(0.182302196514753)	79269(0.181819943567089)	26207(0.180371304064456)	201456(0.180061092081701)	6468(0.179833726800839)	26260(0.179514188731254)	414060(0.177598781571456)	259173(0.177598781571456)	26224(0.176921793772504)	2563(0.176789345477326)	8519(0.17605971454263)	5024(0.173342967310753)	5023(0.173342967310753)	185(0.173218595121549)	2570(0.173176984089566)	554(0.173139469696844)	22953(0.172849840233328)	85406(0.172307078199305)	51304(0.171111203442882)	26190(0.169542215528046)	282974(0.168654455424531)	7064(0.168363062643531)	10430(0.166720195581466)	56475(0.166436001244788)	8454(0.164915988589227)	2569(0.164049196974439)	10564(0.163076170231101)	66008(0.15952368029665)	26272(0.156997075828085)
Tetracosanoic acid methyl ester	524471	5732(0.258092952626817)	9536(0.244155961788271)	5733(0.197862451947296)	5731(0.193091897880225)	5730(0.18863087541856)	5737(0.17344023464603)	3652(0.156068617195754)	5145(0.150821333429988)	131890(0.150821333429988)	5158(0.150821333429988)	6336(0.146579634927004)	2976(0.145475918050992)	112(0.141820817900599)	1139(0.139846947576953)	1137(0.134616952610806)	80852(0.132578355544808)	5739(0.132021469877839)	5408(0.130426219089203)	5406(0.130426219089199)	8513(0.130426219089199)	1208(0.130426219089196)	57658(0.130329921313007)	1464(0.1288694445411)	55811(0.128271834038733)	2898(0.128211478358019)	7447(0.127900247647087)	79174(0.125969597455133)	132320(0.121706861062463)	64805(0.118774564370192)	1269(0.118667965773513)	2900(0.115832976073816)	1412(0.115373673507515)	8499(0.11276817101128)	3061(0.10666365468273)	2901(0.106233066555331)	56259(0.105528229349967)	1002(0.105359307857589)	2895(0.10444320142872)	80835(0.102337145387941)	80834(0.102337145387936)	83756(0.102337145387931)	3060(0.102271071981054)	1636(0.0998791763138918)	50943(0.0995669938621892)	909(0.0987865565395127)	5090(0.0949478645074128)	721(0.0949058535190064)	64130(0.0943805840421057)
Carvacrol	10364	84717(0.245216831795628)	7201(0.245186654770896)	23168(0.244728464120642)	154(0.243560837255065)	2769(0.241724697609281)	408(0.232308963274904)	4985(0.229626119837937)	130(0.2248895338719)	5042(0.218063074952802)	90333(0.215614714089232)	260425(0.213928904025113)	155(0.212525237554339)	81844(0.212497920014827)	114571(0.210822088624363)	28232(0.210822088624363)	1811(0.210822088624363)	23099(0.20996142495466)	55661(0.208795092764277)	57453(0.208288586594843)	285855(0.207903449418016)	7555(0.207321767420371)	6553(0.206004402956195)	6039(0.201757883455466)	94233(0.201757883455466)	283248(0.201757883455466)	9368(0.199549294800267)	6579(0.199331221883982)	153(0.196997292991396)	85027(0.195004254230837)	55266(0.195004254230837)	55850(0.195004254230837)	22903(0.194731235572552)	407(0.194275501631367)	5365(0.193107637110746)	10871(0.191584694769486)	26580(0.190983392093029)	1241(0.189710593986402)	525(0.188261028961909)	83874(0.187201075504816)	10203(0.185366743415865)	4923(0.184531774790057)	827(0.183422228936447)	84545(0.182557432786222)	28966(0.182321612328293)	4988(0.181220766335372)	4986(0.181192300266504)	83638(0.180823958266554)	27350(0.179985625627276)
Geraniol	637566	5731(0.332298484279297)	9536(0.332064115387372)	5732(0.323892701727216)	5737(0.321152879771675)	5733(0.306565324522093)	244(0.303282914724194)	112724(0.303280725260149)	5681(0.303208171487878)	5948(0.302658071414633)	5949(0.30264327314907)	84913(0.302487827827349)	145226(0.302254982979451)	1577(0.292288174451735)	9227(0.290803685097073)	5730(0.289941761462671)	6017(0.289391611760156)	5959(0.241213158743173)	80142(0.227770209196518)	8854(0.224924096234768)	54936(0.221612490306712)	339804(0.216872113081623)	57834(0.216872113081623)	166793(0.216872113081623)	5995(0.214508341699936)	3614(0.209381881064073)	26020(0.207832689701309)	3225(0.207283215802679)	3615(0.205352375411876)	5947(0.199944777724532)	9441(0.199321131021467)	51523(0.196577219000312)	6554(0.193806469893489)	119710(0.192422060097394)	5145(0.192021264139168)	131890(0.192021264139168)	5158(0.192021264139168)	2197(0.191840422319013)	26471(0.190683407756188)	5654(0.190102456518554)	4857(0.188054230801302)	51053(0.187873796090169)	55536(0.187799230530384)	79812(0.187799230530384)	216(0.18674629607612)	5547(0.185515431299363)	79413(0.183479692020319)	57733(0.18138361435504)	1382(0.180669805976307)
Benzoylmesaconine|Mesaconine	3036967|24832657	6336(0.234747052073817)	132320(0.22911867267421)	1408(0.222146218265957)	5536(0.217452326986587)	7272(0.211296219777753)	81027(0.208001733190223)	5366(0.191508689870878)	23327(0.183147916912644)	11316(0.182746651870166)	915(0.182099550715495)	566(0.181771955860779)	638(0.178018737186549)	1780(0.176589042107551)	6554(0.17590034131504)	119710(0.175631035085117)	50487(0.1750222042029)	7444(0.174619110486791)	4832(0.1745772933921)	3460(0.174537221729677)	481(0.172116188856732)	6871(0.171976931452615)	3356(0.171908566990864)	9669(0.171904307454158)	7041(0.171738743050905)	9716(0.170985456768196)	23215(0.170878176707993)	64061(0.170603252892573)	5799(0.170060752244953)	10573(0.170052478533544)	9413(0.169998839373506)	158399(0.169892352052764)	4775(0.169570131714443)	23469(0.168722585140311)	4857(0.168721815437632)	8739(0.168420700569747)	6601(0.168070786416362)	5087(0.168064842890707)	55617(0.16739853050708)	9729(0.167369129259473)	11319(0.16728141894766)	63970(0.167233952166762)	7536(0.167002917002467)	6756(0.166754556795815)	3175(0.166527840051961)	8028(0.166281879160786)	3218(0.166200054401168)	6249(0.166192222037772)	7267(0.165487893932075)
Cryptotanshinone	160254	1723(0.238424382471913)	1473(0.149181396732946)	6439(0.148776617068646)	632(0.148598506431719)	1512(0.146935711208682)	10972(0.145178073667051)	2677(0.13431844526892)	1520(0.132436220250156)	2158(0.130232400988925)	2769(0.127090484347679)	4986(0.121849603916844)	525(0.119808042535331)	6532(0.118587105053765)	6530(0.118358653570324)	6843(0.115488105453632)	167838(0.115235082386489)	9751(0.114966948152927)	4985(0.114337681987023)	134957(0.114209524524239)	29091(0.113967277544813)	157(0.113964374685331)	8858(0.113436509022351)	4988(0.112455682366174)	11080(0.111829971933163)	496(0.110766435143866)	23254(0.110480664952562)	10814(0.110118339487627)	124056(0.109040950168739)	6804(0.107347549563785)	10815(0.106704147641291)	1269(0.106116602608534)	27035(0.105390760605009)	4295(0.105381671658754)	2862(0.105186875525046)	5368(0.104986231553648)	9066(0.104888023152283)	4987(0.104395242785861)	1636(0.10424435673703)	85027(0.104239488898732)	55266(0.104239488898732)	55850(0.104239488898732)	6870(0.103089477702198)	6865(0.103089477702198)	2150(0.102498949284052)	26580(0.101754499460812)	9737(0.101683986503102)	1396(0.101668203552416)	8455(0.100888430696888)
isoglycyrol	124050	10871(0.258529441482941)	84717(0.244949371474028)	7201(0.244909294646422)	23168(0.244872235967089)	154(0.243604311445874)	408(0.2367406000335)	5042(0.235363715418513)	84838(0.234100407955203)	7555(0.233314844540698)	81844(0.230287737103247)	55661(0.220640119236619)	285855(0.219510486847113)	23099(0.21889067398277)	6553(0.217962017363477)	130(0.21734476695725)	260425(0.216965474449011)	407(0.214504161801713)	6039(0.211096069787571)	94233(0.211096069787571)	283248(0.211096069787571)	57453(0.208019923697799)	3360(0.207391981539132)	9590(0.207363182433641)	1445(0.205770516713576)	3553(0.205133717918875)	827(0.20451757005002)	4489(0.203842642621639)	83874(0.203182589699745)	10203(0.200517178720516)	4923(0.200292375611512)	84545(0.198919601783879)	5744(0.195414587454644)	155(0.19501325331864)	83737(0.194182251485887)	124739(0.192822901756828)	90333(0.192762198198183)	2769(0.192426430343404)	79672(0.192092810450889)	6901(0.190948491980354)	4985(0.188096302098137)	10521(0.18798020346283)	7200(0.187781916424259)	6579(0.186938860034078)	9683(0.185137894401684)	3502(0.185075561391655)	10675(0.185075561391655)	114571(0.184376847886756)	28232(0.184376847886756)
Catalpol	91520	8972(0.284126384520969)	3730(0.259749612772751)	1562(0.259749612772751)	3018(0.25596282827576)	9583(0.238189968070137)	58478(0.238189968070137)	51106(0.237677522431305)	85366(0.235311505870775)	2975(0.233888222445779)	5442(0.233259789049628)	127703(0.230933698948529)	131474(0.230443100138353)	26521(0.22642982456286)	5653(0.222883940427043)	339965(0.22247829018883)	8099(0.22216137137084)	50511(0.219682828254889)	51426(0.21894824553282)	9768(0.218533698898655)	11196(0.218488857786541)	462(0.217447718120864)	6210(0.214582645889546)	5937(0.213831808247142)	6232(0.213519471248128)	2548(0.213224211741099)	6193(0.212352069580032)	64841(0.212313618704427)	279(0.211506095938181)	2140(0.211261794318341)	84958(0.206528555499352)	51110(0.205210236568097)	333931(0.205188174981677)	8704(0.205065990294117)	3906(0.204470805010202)	64772(0.203643075209385)	55577(0.203210394434129)	10597(0.203161944244769)	51388(0.203161684625623)	10734(0.202954445699888)	9985(0.202919000982525)	114088(0.202517164053772)	276(0.201910739605785)	81557(0.201551752158389)	6240(0.200700489163705)	2683(0.199922369100627)	51172(0.198438364073588)	5422(0.197145787072428)	6773(0.196938277385285)
Linolenic acid	5280934	10280(0.646084579410778)	6546(0.636934623187404)	6710(0.556311202737908)	55974(0.554927345429235)	51393(0.547879401749697)	143425(0.520971533795156)	8170(0.463862162290531)	9166(0.463862162290531)	287(0.413884738690539)	353355(0.409509537692101)	11162(0.409509537692101)	92689(0.409509537692101)	115294(0.409509537692101)	29953(0.40921653001166)	63915(0.407846107044784)	55330(0.407118515664386)	388552(0.406563859365287)	2181(0.39103159113175)	7442(0.389865795827442)	29970(0.357581950402682)	5532(0.333547928839825)	2864(0.313056977961922)	55432(0.304034315468688)	9362(0.303667519632526)	55719(0.301280890201542)	23557(0.283419948438108)	29940(0.27397452895364)	10956(0.270146645541016)	2182(0.26131203511061)	282991(0.207526911264221)	57158(0.19531640007265)	252839(0.193448878987441)	8884(0.190596243602376)	11226(0.188627177113564)	6649(0.183050726083011)	5730(0.174226728794859)	10516(0.173848620099897)	54893(0.170368436841607)	9536(0.168487422370166)	255877(0.168443529595936)	5732(0.166261025091876)	859(0.164416722600854)	51564(0.161215282253497)	5274(0.160541558976017)	5707(0.15815026737734)	5731(0.157860605802453)	1(0.157518989048723)	10078(0.157243038201481)
Protocatechualdenyde		154(0.274846299821639)	84717(0.274434905410821)	7201(0.274395728829999)	23168(0.274121304784457)	408(0.273306066780332)	155(0.255323618871979)	10871(0.254573529694851)	55661(0.25409720084936)	285855(0.252700680001103)	6553(0.251155874650434)	130(0.247123433589549)	23099(0.244119242792433)	5042(0.240363669763993)	7555(0.239409151025268)	260425(0.239401462029093)	9516(0.236015427675745)	81844(0.236012226026162)	51316(0.234396764195639)	4489(0.23264571665721)	57453(0.230883790776876)	407(0.224120844723972)	153(0.223375056032961)	6039(0.219645544583478)	94233(0.219645544583478)	283248(0.219645544583478)	84545(0.218570654953004)	10203(0.218348984326441)	3795(0.216510069299444)	3553(0.213345639236658)	84838(0.212323007696421)	4923(0.211807594409296)	9590(0.210558907149277)	9863(0.208727645848441)	409(0.208099531630929)	9223(0.207793699291355)	10969(0.207412534923562)	7200(0.207293055234181)	28966(0.206839013068907)	83638(0.2063718278844)	6138(0.20501629857244)	5744(0.204271429770266)	6456(0.203939126289477)	8455(0.203060937239036)	57030(0.202466708167643)	4985(0.201741630050163)	10570(0.201704647072921)	57216(0.200707727573554)	10987(0.19840031434468)
Skullcapflavone Ⅰ	5318506	84717(0.206635865362201)	7201(0.206594861773096)	23168(0.206445457594609)	154(0.205925677568651)	55661(0.202736929650243)	285855(0.201954831266058)	408(0.200714345637912)	6553(0.199829008857199)	130(0.198214304300085)	4923(0.197478815118244)	84545(0.195240130643108)	10203(0.193869341259877)	5042(0.187059460028436)	10267(0.186788802281379)	81844(0.186112851491439)	3795(0.185471695736874)	7200(0.183729417372506)	4842(0.183312410599443)	23099(0.181954516427224)	827(0.181611522927038)	1445(0.18094801274061)	2652(0.179499723010075)	54585(0.179421809140935)	83874(0.178118364795325)	7855(0.177228714765669)	409(0.177157010622924)	2769(0.172995648552363)	260425(0.17235095527438)	9630(0.17157494141909)	1318(0.170456190282778)	7555(0.170364816542568)	7412(0.168595945645131)	57453(0.167040398623737)	6039(0.164756062492649)	94233(0.164756062492649)	283248(0.164756062492649)	170591(0.163586543973552)	3360(0.162340581772931)	9590(0.161099483996412)	153(0.160932586281787)	6361(0.15999252590988)	4985(0.1598192289618)	4489(0.15970952135221)	27352(0.158894991461886)	156(0.158638488840752)	407(0.158229345049322)	2869(0.157952766700446)	57030(0.157947453324488)
Licopyranocoumarin	122851	154(0.238618827607249)	10871(0.235795588007975)	5042(0.233138555648657)	84838(0.232155157952253)	7555(0.229745788688379)	81844(0.227818483265401)	84717(0.227532419888765)	23168(0.227497951766615)	7201(0.227489463908234)	408(0.217848967940761)	407(0.213940320710026)	1445(0.211188101501389)	6039(0.210817748703019)	94233(0.210817748703019)	283248(0.210817748703019)	23099(0.20887069213137)	260425(0.207858263771907)	9590(0.206213597879189)	130(0.205841915219773)	55661(0.204997088246864)	285855(0.203860205463499)	3360(0.202804055356345)	6553(0.202232190939968)	3553(0.201549484448931)	155(0.20145197069403)	57453(0.199425831295136)	827(0.195574115711716)	83874(0.193771839055673)	83737(0.191654362793634)	90333(0.189226191886092)	9683(0.189055194575457)	10203(0.187447601815188)	4923(0.186791708368395)	84545(0.185994622917689)	6901(0.184625097324062)	22903(0.183424232407988)	6579(0.183415576280377)	4489(0.182868621462617)	124739(0.182714552980037)	5365(0.182320155801717)	114571(0.182123628194416)	28232(0.182123628194416)	1811(0.182123628194416)	2769(0.181682226326649)	79672(0.181429204425381)	4897(0.180595354290446)	57216(0.179910168758426)	5420(0.17844298128482)
Licoricidin	480865	84717(0.308082768722147)	7201(0.308044086309404)	23168(0.307881678660057)	154(0.304846442975981)	5042(0.298527982654667)	408(0.294369644858564)	260425(0.293967295454856)	81844(0.291935633099749)	57453(0.288102094112821)	7555(0.28684294318614)	130(0.285971280805027)	55661(0.272503758464119)	285855(0.271328409241196)	6039(0.270931630629972)	94233(0.270931630629972)	283248(0.270931630629972)	6553(0.269308863458966)	23099(0.267476674558788)	407(0.260628226733871)	57030(0.259366916899191)	28966(0.254689046062677)	83638(0.25346877437572)	6456(0.25270382521818)	22903(0.251024987442494)	3553(0.249466339595884)	5365(0.249194633867559)	10570(0.248123558507026)	25975(0.248029356916549)	153(0.247339169364321)	90333(0.245889137652501)	3360(0.245144344728227)	9863(0.245113604479731)	10969(0.244585722927146)	9223(0.243226236821092)	1445(0.242426885998391)	9590(0.240256565660838)	2769(0.239911961411271)	10871(0.239851573578209)	3502(0.238383116014894)	10675(0.238383116014894)	3795(0.238311042886131)	57216(0.238188427367363)	4897(0.236076112800306)	827(0.235737696566508)	8325(0.233696464973333)	114571(0.233195152560943)	28232(0.233195152560943)	1811(0.233195152560943)
Caffeic acid		84717(0.272513573186183)	7201(0.272473301748012)	23168(0.272329315239759)	408(0.2714903751278)	9516(0.266873297031305)	154(0.264164994384621)	55661(0.251129004405591)	285855(0.249605361027354)	6553(0.248057027163259)	130(0.24703631209821)	155(0.246013207702074)	84838(0.242781139710538)	10871(0.242582371977578)	23099(0.241852788203761)	51316(0.235304604785787)	4489(0.235110354616352)	5042(0.230917609768799)	7555(0.230703592085823)	260425(0.228535294232483)	81844(0.226799889207351)	57453(0.220909616532189)	84545(0.220160834942462)	10203(0.219926772306083)	407(0.217219813898687)	3795(0.214500237955199)	4923(0.213222904489929)	153(0.212444454822405)	11214(0.210888426972092)	6039(0.210592924441942)	94233(0.210592924441942)	283248(0.210592924441942)	7200(0.208619802506437)	409(0.208511579917136)	8727(0.206332972455288)	3553(0.205133167404905)	9590(0.203411657267041)	10969(0.20238789935175)	10987(0.201504899056537)	6138(0.201420776635473)	9863(0.201252900599117)	8455(0.200886138753763)	5705(0.199897315895312)	5744(0.199182038332576)	9223(0.199115937961939)	28966(0.197261526656803)	83638(0.196774165116526)	4985(0.196632490526766)	81873(0.195502144565143)
Histidine	6274	3035(0.644334633973936)	10991(0.482278063461901)	1292(0.433326458693011)	6897(0.334124048323966)	3150(0.318744004885346)	9255(0.313888193947327)	9521(0.313502407059507)	7019(0.310719679352337)	3735(0.299376698059844)	10380(0.297338396507544)	9761(0.297136965714905)	64928(0.291699456262865)	51520(0.28718505156978)	7965(0.285908649957957)	10330(0.285494741276987)	4048(0.283297168056236)	284615(0.283114291695241)	51031(0.282988067371859)	5859(0.282873074591155)	51124(0.279384754880837)	338599(0.279384754880837)	55190(0.279384754880837)	84935(0.279384754880837)	26476(0.279384754880837)	10906(0.279384754880837)	140707(0.279384754880837)	51154(0.279384754880837)	28998(0.279384754880837)	10613(0.279384754880837)	79073(0.279384754880837)	171392(0.279369827172451)	55856(0.278303722712052)	55252(0.274834499842338)	23011(0.273898487186751)	387522(0.273882804312475)	23428(0.271418104211277)	7458(0.268894258182495)	5917(0.268681028302199)	389(0.268425109123447)	128178(0.268136757453124)	55752(0.266977921392458)	23495(0.265783638873794)	87178(0.264360167418662)	80218(0.261992543261269)	80155(0.26188748916443)	6364(0.261657479899699)	9173(0.259463744598072)	29085(0.25742820314803)
Miltipolone	10086184	2005(0.281353806560255)	8805(0.279981065299937)	6996(0.273970154734521)	7556(0.272626587299138)	6873(0.270725000399518)	79611(0.269414705411706)	9282(0.268300500293908)	7044(0.267026930610404)	4298(0.266858918204717)	9937(0.266551640088457)	4603(0.264417711443698)	51162(0.26398338113161)	6605(0.263246899014534)	2709(0.263234434185428)	6884(0.262463744555698)	55576(0.262254890823856)	6097(0.262123268294623)	63925(0.260503310732481)	23054(0.25976648406696)	5994(0.259674394053298)	5927(0.259105153220652)	3725(0.258948756098645)	57338(0.258206091001383)	196528(0.258200635730238)	5450(0.258120489764318)	6602(0.258045882106112)	6597(0.257192981445934)	905(0.257034936438539)	11108(0.256535414000163)	573(0.255910588856676)	5469(0.255403974046747)	26054(0.254562685915376)	6595(0.254437167230638)	51111(0.252845113664259)	84332(0.252803540749334)	333926(0.252437480430499)	2268(0.252328009630218)	8382(0.251000946120216)	84695(0.250075546572742)	8648(0.24841164011918)	51575(0.248364205545528)	9612(0.247925513409221)	27043(0.247124057788877)	83861(0.246650348978149)	55088(0.246650348978149)	55146(0.246650348978149)	10610(0.246650348978149)	79673(0.246650348978149)
Quercetin	5280343	84717(0.292191841253433)	7201(0.292154523033414)	23168(0.292092076917856)	154(0.289580949579796)	408(0.283651774878132)	155(0.273275965950599)	7555(0.269969299447282)	5042(0.268942292261323)	55661(0.267959364178016)	23099(0.267926442626114)	285855(0.266531655472554)	130(0.265725327231106)	6553(0.265056107810767)	81844(0.263972972744772)	10871(0.253937391650426)	260425(0.253260682917059)	407(0.247957104138858)	84545(0.244210584018627)	10203(0.244040307586759)	6039(0.243998774854835)	94233(0.243998774854835)	283248(0.243998774854835)	57453(0.242352875078626)	3553(0.23936410975361)	4923(0.237507729682461)	4489(0.236396256270757)	90333(0.233351721441359)	7200(0.232788094613642)	114571(0.230399253753671)	28232(0.230399253753671)	1811(0.230399253753671)	1445(0.229447624231497)	9590(0.228197169263541)	83737(0.226025352693316)	6579(0.22591112319625)	84838(0.225765659547506)	83874(0.224069772170543)	4897(0.223860111809366)	409(0.222867219686333)	9368(0.222163123690174)	827(0.220770432277201)	6138(0.220691073894752)	6456(0.220485790866956)	3795(0.218001924485249)	57030(0.217132031048355)	10267(0.215292330510544)	9683(0.213806502093922)	4985(0.213136621995078)
3-Methyl-2-（2-pentenyl）-2-cyclopenten-1-one	1549018	6546(0.636951545610871)	10280(0.631296256307898)	6710(0.539714959212185)	55974(0.515171417263326)	51393(0.509815004624642)	143425(0.484617956002385)	2181(0.472649717609925)	8170(0.439989837594025)	9166(0.439989837594025)	287(0.431086661606342)	353355(0.397025709596071)	11162(0.397025709596071)	92689(0.397025709596071)	115294(0.397025709596071)	29953(0.395989464688518)	2864(0.390424338469692)	63915(0.388837804526485)	388552(0.388560109132028)	55330(0.387848456355294)	7442(0.38744895427381)	29970(0.383165686234013)	5532(0.367599775287576)	9362(0.362841524024168)	55432(0.345099214148943)	10956(0.328119985359684)	29940(0.321692234756218)	23557(0.308293967955944)	2182(0.305341173094613)	55719(0.287016853888354)	5453(0.264135778327754)	9612(0.256143737808875)	9611(0.255962572048407)	8431(0.255183509657424)	8820(0.254280725043261)	51364(0.253716809907598)	8204(0.253368961791405)	83758(0.253195656278177)	9572(0.252426411593151)	3236(0.252173256103043)	51111(0.251788029357775)	9759(0.250368651256957)	5980(0.249115865901121)	8805(0.248706845714894)	5629(0.248327508864764)	84330(0.245393712670046)	143379(0.245393712670046)	57642(0.245393712670046)	81888(0.245393712670046)
Danshenxinkun A、B、C、D|Danshenxinkun D	127172	1520(0.210088226634945)	1473(0.209016144714282)	6439(0.20374673547816)	1512(0.202150530955149)	632(0.199645593111403)	2677(0.178136406583979)	51573(0.176481128778832)	121274(0.17223184347941)	6713(0.172093337989225)	2158(0.171622093047581)	11202(0.169324841659104)	54663(0.169324841659104)	5997(0.160842249966212)	167838(0.156813426619689)	9751(0.156394965479832)	134957(0.155658383721991)	29091(0.155483555993299)	6530(0.15405121648896)	6843(0.15368411822345)	230(0.152489586170128)	51699(0.151312035533691)	496(0.151295606341127)	8858(0.15122661987038)	6804(0.149761301690327)	4537(0.146635461230416)	518(0.146635461230416)	9552(0.146635461230416)	9066(0.146123276992582)	55890(0.146063288421345)	1128(0.14599418647124)	4924(0.145514020627985)	6620(0.144252409718158)	2150(0.143842101586769)	85406(0.142912882296825)	5743(0.141714178449799)	8519(0.140248573488845)	1132(0.135593542282756)	90379(0.134308754627314)	54876(0.134308754627314)	79269(0.133864934659673)	6532(0.132694077359673)	6531(0.131523172577684)	5368(0.131237798847377)	5624(0.131067849517183)	4987(0.131000599890429)	3268(0.129904529416506)	57085(0.129810943238476)	7920(0.129562564651195)
ROYLEANONE:7β-Hydroxy-8,13-abietadiene-11,12-dione	275526	6996(0.576812268491999)	79611(0.575626371440675)	5927(0.575174868830571)	7044(0.570506791220007)	4298(0.570324256798264)	51162(0.570071261423221)	8805(0.567447138049631)	573(0.567276739559659)	7556(0.566384570477473)	9604(0.555073503639956)	3148(0.549975664546397)	57719(0.548443833573077)	6595(0.548351327555973)	57017(0.548231621030599)	5452(0.547251091162724)	51412(0.54647429467314)	6602(0.545544558027712)	7110(0.545302894938723)	5451(0.54238683131789)	54957(0.542052077118104)	119710(0.541734299951933)	6554(0.541618628443757)	1044(0.541398477300651)	9282(0.532607353434538)	6621(0.532110176234608)	84695(0.531671928092217)	442867(0.53098259118112)	3223(0.530912347055975)	3234(0.530912347055975)	63974(0.530912347055975)	83937(0.530912347055975)	3232(0.530912347055975)	2296(0.530684792702397)	442868(0.530481760648121)	9083(0.530481760648121)	4857(0.529706041006333)	1050(0.526621662452236)	55827(0.526362605337644)	83861(0.52622149628569)	55088(0.52622149628569)	55146(0.52622149628569)	10610(0.52622149628569)	79673(0.52622149628569)	57136(0.526209900960138)	11018(0.526155190380994)	24148(0.525818819591225)	3237(0.525771549620989)	6601(0.524238884683479)
polysaccharide	197416	462(0.430240165123416)	3730(0.426668320064333)	1562(0.426668320064333)	5653(0.368505428691845)	51399(0.320506300175923)	6383(0.315416829983098)	2548(0.298908530795875)	279(0.292362929574889)	1446(0.283983944843826)	8972(0.266988010367943)	8475(0.253652322260803)	6404(0.25344122685427)	5340(0.24694102112128)	51156(0.239624916048911)	51499(0.231550612982891)	6403(0.230171341149478)	84958(0.224426710893724)	100133941(0.218129390356098)	350(0.215951429606251)	9965(0.207303469598644)	114088(0.204419197401777)	8897(0.202544826659497)	4814(0.201709728250695)	2264(0.200670872558226)	6773(0.200115004883183)	6476(0.196982703378169)	3018(0.196584121775532)	1437(0.189986290974335)	654817(0.18853958846492)	2249(0.188412822005264)	2159(0.187931825090176)	9702(0.187541966397934)	8741(0.18734961615162)	3817(0.185664714922943)	2975(0.185388758873363)	1991(0.18390113878266)	9982(0.182969325819569)	10673(0.181681572941602)	85366(0.180455184757022)	6657(0.179843005644521)	2526(0.179575438460643)	53822(0.176432416670805)	9887(0.176213906672534)	2719(0.176020130176515)	127703(0.175956192605153)	6400(0.175642101055934)	149483(0.175592713496362)	477(0.174802550732756)
Neojiangyouaconitine	196801	50487(0.26844168301451)	7041(0.264477678301853)	6336(0.261648270843574)	573(0.260585510774713)	132320(0.256045798905057)	119710(0.25169570493184)	79915(0.251638952758305)	6554(0.251429216306256)	6601(0.245228611705243)	6605(0.245190908294928)	5883(0.24514344808778)	5927(0.244476641656251)	4857(0.242819408491259)	9604(0.241999570515604)	6756(0.241341034468081)	8028(0.240923866369655)	7110(0.240400554820106)	9669(0.240230650261799)	54957(0.240213728707069)	135458(0.240058546124143)	6871(0.240049343686267)	55827(0.239774305721432)	57719(0.239529327915942)	57017(0.23938876071157)	6595(0.23934275327214)	481(0.238945548145215)	51412(0.238270239768563)	1044(0.237674438179531)	6598(0.237488294001472)	57282(0.234990040722542)	915(0.234162094428958)	1059(0.234092226158157)	27043(0.233429218283558)	3175(0.233405771926446)	5087(0.233292210653081)	23215(0.233291487687884)	23327(0.232649243797225)	5799(0.23246257968476)	64061(0.232294145386847)	11319(0.231974477805908)	3211(0.231719280517157)	158399(0.231257328539905)	8125(0.230202922686914)	225689(0.229942827150292)	24148(0.229869328775893)	23469(0.229830847223839)	1050(0.229805365982938)	10092(0.229785661829596)
6-o-Methylcatapol	44144291	8972(0.266932047470828)	3730(0.265987440935528)	1562(0.265987440935528)	3018(0.241773901297379)	5442(0.221902709351745)	85366(0.220527246208004)	9583(0.220454092025564)	58478(0.220454092025564)	51106(0.220305057940938)	5653(0.220119875507006)	462(0.2185967665103)	2975(0.215571547753453)	131474(0.213609976896842)	339965(0.213580999689388)	127703(0.211690962405113)	26521(0.210555766527166)	8099(0.208820250325772)	6210(0.203641567972508)	50511(0.203592890691763)	51426(0.203577156425644)	9768(0.203220582193531)	11196(0.203170923067251)	5937(0.201729585965065)	2548(0.201221338132358)	6193(0.201205887686028)	279(0.200931431702059)	64841(0.197334324208052)	6232(0.197129978345426)	2140(0.196478767423041)	84958(0.191685344745889)	51110(0.191482247680907)	333931(0.191457968346482)	8704(0.191344149192227)	10734(0.190682925784323)	9985(0.19064481176858)	3906(0.19047396075316)	81557(0.190172658904889)	64772(0.189844695841068)	10597(0.189477712562531)	51388(0.189477428036109)	114088(0.189415542174764)	6240(0.187698908212838)	55577(0.187291509148167)	276(0.187177330109044)	2683(0.186951043341313)	9965(0.18693398329561)	6383(0.186782288785404)	5422(0.185359978196644)
Eugenol	3314	84717(0.304930841296912)	7201(0.304896009130977)	23168(0.304736402370548)	154(0.303052825481873)	408(0.295968406534624)	130(0.275435619611876)	5042(0.268200622004393)	260425(0.266721533379703)	55661(0.266342984042296)	285855(0.265160947783155)	23099(0.264092198967794)	6553(0.263253431566868)	81844(0.262264225350081)	155(0.258756150492178)	57453(0.258213204452136)	7555(0.257711057487853)	4985(0.253033658314466)	2769(0.250246166694983)	3795(0.243084354660025)	6039(0.243068123640733)	94233(0.243068123640733)	283248(0.243068123640733)	153(0.24265733268595)	83874(0.239101857836197)	827(0.236168396598082)	90333(0.236003234657599)	407(0.234423539715023)	57030(0.233402904144407)	4842(0.231347451026542)	114571(0.231201026925549)	28232(0.231201026925549)	1811(0.231201026925549)	28966(0.230015219410484)	6456(0.229094144760268)	83638(0.228657460035994)	4923(0.227872746370676)	3553(0.226932470296114)	10203(0.226843540774273)	84545(0.225476737311013)	9863(0.224568948640905)	10570(0.223908472677024)	25975(0.223757090092561)	6579(0.223058995376115)	9368(0.222004428312579)	9223(0.221173599194007)	1445(0.220926999589282)	22903(0.219379618413763)	5365(0.218536637779873)
2-Methyl-1-butanol	8723	3652(0.29501562437153)	2976(0.288844070137118)	1139(0.27799182274737)	112(0.270752409231383)	1464(0.265340407833832)	80852(0.262080148239704)	57658(0.261742693095205)	1137(0.255149984763108)	2898(0.251346517390015)	1412(0.240588374102791)	7447(0.240583010397288)	8499(0.238765539768333)	79174(0.238654740866592)	56259(0.229689649901013)	2900(0.222080765017027)	2891(0.217766460811826)	2901(0.214608497032249)	2895(0.207722687647628)	5792(0.201892315390179)	909(0.194287960503972)	586(0.193320417363068)	64130(0.193034835842984)	1002(0.189638828547779)	29062(0.188556465668149)	6386(0.188462257217184)	587(0.18395713309669)	8694(0.182697821320156)	6711(0.181221102808579)	23150(0.180191342872602)	9265(0.17620980001223)	1000(0.176106192909355)	923(0.174523891554879)	10369(0.163463445634557)	2589(0.148802014829449)	2892(0.148654439453836)	25825(0.148421460206519)	83941(0.148130406545454)	9452(0.148130406545454)	36(0.143552065650697)	152330(0.140871479854289)	5067(0.140871479854289)	10078(0.138627663243231)	5730(0.138477665135323)	10418(0.138193717340305)	27111(0.138018832308401)	26071(0.137939372845551)	5562(0.137352527617707)	8933(0.13673356503835)
pyruvic acid	1060	9194(0.97119155281626)	23539(0.970870769689329)	148156(0.970379106331692)	9122(0.970118961943815)	9123(0.970118961943815)	51594(0.96765943753848)	6906(0.966520350289861)	6566(0.92753526729028)	1174(0.825429311181603)	93145(0.80596102047173)	23504(0.79938741710974)	6567(0.782684215244758)	56915(0.775937432236439)	874(0.765727040103401)	7849(0.738857764914521)	23038(0.702316933252671)	339390(0.697085132830051)	64506(0.677923397153528)	8905(0.675886590456796)	682(0.651279249421972)	9459(0.647323821095482)	9960(0.639632578157722)	163590(0.633670559708587)	2027(0.631665287977418)	4189(0.621630524941575)	64359(0.612792217360198)	5313(0.603278801674091)	64902(0.555181941524041)	84248(0.544965893938364)	229(0.544126525381464)	339201(0.543856548481081)	8681(0.543856548481081)	27440(0.543856548481081)	4494(0.543856548481081)	84688(0.543856548481081)	54020(0.543856548481081)	196472(0.543813378157004)	8925(0.527988791323295)	8653(0.525456298157575)	84676(0.522894880447827)	5091(0.521052360238671)	8666(0.510354803352824)	9493(0.489288711514365)	51042(0.482003669673868)	6861(0.480555952333098)	57143(0.478292541746799)	4495(0.474451994669075)	5861(0.459142655899502)
Isotanshinone	623940	4924(0.202093170723389)	4537(0.201414453552172)	518(0.201414453552172)	9552(0.201414453552172)	55890(0.200869459494052)	5743(0.194344748294193)	7920(0.186015327258527)	51573(0.181848611973368)	5742(0.181453907552275)	121274(0.177740088752967)	8519(0.177594853008922)	6713(0.176733568313737)	50813(0.176095062254199)	11202(0.175072570620052)	54663(0.175072570620052)	84065(0.174117624201154)	167838(0.170714906539139)	9751(0.170193360120538)	81502(0.170019556357863)	6530(0.169733576499405)	134957(0.168383059819238)	29091(0.168242729161688)	8451(0.167013289347682)	496(0.16563049442214)	9978(0.164650490218468)	5997(0.164575768256201)	6843(0.162318998186783)	6804(0.161870257414399)	51699(0.158690896171397)	90379(0.15782889070906)	54876(0.15782889070906)	6813(0.157801059335587)	79269(0.157549418323888)	9066(0.157259102726474)	8533(0.149001202058022)	1128(0.141626329767206)	6845(0.141421430394214)	230(0.140238131790868)	6532(0.139748510792032)	54585(0.138089242648837)	201456(0.13791791996725)	6468(0.137813577635943)	54221(0.13749436934558)	26260(0.13729685391459)	7855(0.136951216788642)	114907(0.136362891560413)	525(0.135951944248542)	6531(0.135237782020077)
Citronellol	8842	51523(0.269787979777051)	55536(0.240772410100987)	79812(0.240772410100987)	5547(0.237120853723074)	57733(0.23557241685201)	51162(0.227299939700499)	86(0.226009091993111)	5927(0.220435948584343)	79611(0.21403712152118)	7044(0.211092885120379)	4298(0.211000904168161)	6602(0.210193975456901)	57719(0.210108946213298)	57017(0.209928334845485)	6996(0.209824949935831)	51412(0.20852166881592)	10036(0.203605513961536)	6595(0.203461049024397)	5737(0.20302197742527)	6554(0.201505401327626)	861(0.201235240954122)	116519(0.200997231522319)	119710(0.200884407571474)	573(0.200091540516399)	5307(0.198908489089778)	5451(0.19706275001119)	9697(0.194821378573057)	6756(0.194672524003482)	8028(0.194644135108422)	11108(0.194536071379151)	4857(0.194267280558177)	8805(0.193623855560667)	5449(0.193386411875939)	6605(0.193227842984575)	57338(0.193000096760727)	7195(0.19291964588406)	84695(0.192880921270585)	5730(0.191973331092583)	51111(0.191926044254065)	5994(0.191924532290004)	10623(0.191589712546874)	80142(0.191525194745909)	8295(0.191404848672246)	83861(0.190572214156543)	55088(0.190572214156543)	55146(0.190572214156543)	10610(0.190572214156543)	79673(0.190572214156543)
Neoline|neoline	120682	9697(0.406298496267164)	9282(0.406071888202661)	573(0.403508205119415)	9604(0.398987176117154)	54957(0.397195787656084)	6605(0.396323879154798)	27043(0.395500077569437)	5927(0.389615370270999)	84695(0.388963392738801)	24148(0.386783628443671)	57136(0.386365342840895)	83861(0.386355566531392)	55088(0.386355566531392)	55146(0.386355566531392)	10610(0.386355566531392)	79673(0.386355566531392)	11018(0.386328566225197)	79611(0.385397964164122)	2354(0.385063951329025)	143(0.384532907771825)	23174(0.383821541633985)	1054(0.38373982022347)	7044(0.383573648995284)	4298(0.383468012248521)	1044(0.3834180508746)	8805(0.383319759516317)	6595(0.382738463394013)	7556(0.38179468370175)	493829(0.379267435900099)	147339(0.379267435900099)	26147(0.379267435900099)	11108(0.378111471174238)	51162(0.378042336352211)	54542(0.376100921247169)	1050(0.374599468761639)	57719(0.374240060348164)	57017(0.374164796113598)	51412(0.37348006956557)	148479(0.373386578893498)	168433(0.372883512134352)	222484(0.372638185299634)	442867(0.372221644735796)	64115(0.372029042726838)	442868(0.371804683360268)	9083(0.371804683360268)	6618(0.371438055606466)	23066(0.371432537210754)	54457(0.371378662841987)
isoliquiritin	5318591	10871(0.244278878527533)	7555(0.239408360214553)	5042(0.234543312527749)	81844(0.229220428789304)	407(0.221979749008472)	84717(0.220594410753777)	7201(0.220591276676136)	23168(0.220454294201946)	260425(0.220300137046842)	154(0.219927445210241)	6039(0.217875097125143)	94233(0.217875097125143)	283248(0.217875097125143)	23099(0.216319519754915)	3553(0.21582537867872)	130(0.214143080146338)	57453(0.21322125162499)	408(0.21146023576963)	6138(0.211115652063024)	150084(0.208392410907904)	285855(0.207540408943131)	55661(0.206607572605985)	6553(0.205800393433318)	57216(0.20494152994132)	9590(0.204926440287286)	10969(0.201874622599259)	79672(0.199815330195613)	83737(0.198321000468127)	27350(0.197916858302112)	124739(0.197063051550949)	9223(0.19450677174177)	6238(0.194228495833941)	146057(0.192410942923079)	84172(0.192407895675457)	84838(0.192106871904512)	1445(0.190959609868166)	10643(0.189749873494076)	155(0.189403554089645)	28966(0.189305232478468)	83638(0.189125882227716)	9863(0.187625616791476)	7988(0.187387605055558)	26233(0.18600121386686)	9683(0.185972542848056)	1147(0.184349694627836)	10570(0.183772951391408)	6456(0.18335052111008)	4489(0.183071227697748)
Miltirone	160142	1723(0.170755151768497)	2769(0.134036968227236)	4986(0.126096337857462)	525(0.125578465457093)	6530(0.124320907474275)	6532(0.12389691754925)	6843(0.121314510561482)	167838(0.121134099742286)	9751(0.120875155045829)	134957(0.120078941848608)	29091(0.119828800131855)	4985(0.118593100826351)	496(0.116504772407022)	157(0.11642804742736)	4988(0.116330708185653)	11080(0.115739548713251)	10814(0.114852867508982)	23254(0.113556124966488)	4295(0.113464483465304)	6804(0.113437359544512)	2862(0.113256476010571)	5368(0.113058382374806)	4987(0.112454663424867)	85027(0.112067330211854)	55266(0.112067330211854)	55850(0.112067330211854)	124056(0.111517742135672)	6870(0.111132554804689)	6865(0.111132554804689)	10815(0.110710890136482)	9066(0.110289386470317)	8455(0.109716921983504)	1396(0.10968335404915)	9737(0.109624043420784)	26580(0.109401930401564)	1269(0.109361442001972)	27035(0.107785377593687)	113277(0.105774869272514)	1636(0.105548885074779)	375(0.105331800570563)	1241(0.104950852221396)	5493(0.103851934001206)	65265(0.103504993722712)	126374(0.103073163374924)	50805(0.102504224252594)	5915(0.102099120819997)	4537(0.10148650650249)	518(0.10148650650249)
Wogonin Ⅲ	5281703	4923(0.16985634449415)	84545(0.166665637981623)	4586(0.166565481300072)	56667(0.166145848564408)	79623(0.166109410027002)	10267(0.16599421607669)	4583(0.165608592047709)	79695(0.165575549572127)	3567(0.164994566386571)	10203(0.163585712597878)	7200(0.156398771569798)	54585(0.153357326013771)	55661(0.152842961457869)	51573(0.152707890470896)	285855(0.152277169911513)	7855(0.152202416846186)	409(0.15217007372135)	60626(0.151957298895815)	2652(0.151782851920798)	6553(0.150192976493005)	2769(0.149603989336367)	55612(0.148791949206822)	1318(0.148712126984673)	156(0.148697410993584)	4489(0.148303159452108)	5619(0.148200475606819)	11202(0.147185248398738)	54663(0.147185248398738)	4842(0.145827263601072)	130(0.145775743715827)	728(0.145727852403649)	84717(0.145525913655326)	3577(0.145518666421226)	7201(0.145489685761983)	23168(0.145274117084082)	154(0.14521819443867)	408(0.143922699991041)	23506(0.143292461721805)	83539(0.143189528766042)	3973(0.141985496500789)	148(0.141541968961439)	5997(0.141468852238662)	1677(0.141423916168713)	170591(0.140886239146503)	79009(0.140874182731808)	3795(0.138975592097301)	4985(0.137583593742719)	827(0.137267285584583)
β-sitosterol glycoside|β-Sitosteryl-D-glucoside	5742590|52940117	79611(0.511355903547296)	7044(0.507144684971351)	4298(0.507033502356574)	6996(0.504555245090535)	8805(0.50313758026853)	7556(0.500909014384422)	51162(0.49593624381956)	573(0.488027590959567)	5451(0.485959565097477)	5452(0.478750051361728)	6602(0.476355214956233)	5927(0.474545030002917)	6621(0.474262837250437)	9604(0.471076331841464)	9282(0.466526194328051)	442867(0.463364002304427)	3148(0.46320070051111)	442868(0.462812058835482)	9083(0.462812058835482)	54957(0.460579597931931)	7337(0.459769878630001)	9063(0.459751649017046)	84695(0.457518168365652)	9697(0.456696127167241)	6595(0.455940532187935)	3223(0.455684750015575)	3234(0.455684750015575)	63974(0.455684750015575)	83937(0.455684750015575)	3232(0.455684750015575)	1044(0.45471273377995)	83861(0.45330534576755)	55088(0.45330534576755)	55146(0.45330534576755)	10610(0.45330534576755)	79673(0.45330534576755)	57136(0.453299754078177)	11018(0.453253702070571)	2296(0.453166806574574)	3237(0.453114346515546)	143(0.450838864367398)	24148(0.450663576452642)	11108(0.450547463468829)	23174(0.450395308445168)	57719(0.448680617625321)	57017(0.448557644949948)	5994(0.447774466570626)	51111(0.447517007807345)
cis-3-hexen-l-ol	5281167	10280(0.524050650670506)	6546(0.521944541493885)	6710(0.454225958970803)	55974(0.433404630897855)	51393(0.432804437597045)	143425(0.413245724562855)	2181(0.386264621568595)	8170(0.367865888418467)	9166(0.367865888418467)	7442(0.345248227191941)	2864(0.338308763945238)	353355(0.323627247686404)	11162(0.323627247686404)	92689(0.323627247686404)	115294(0.323627247686404)	287(0.322983264285074)	29953(0.32256350058068)	388552(0.321650342011339)	63915(0.320996422994899)	55330(0.320981757190112)	9362(0.301432425196319)	29970(0.273303545414991)	5532(0.271873448868852)	29940(0.27182560001088)	10956(0.269885072556338)	55432(0.264720789736444)	23557(0.256872488193671)	2182(0.252498070476826)	55719(0.218385669145072)	2760(0.180504770348918)	57113(0.175697284143442)	84876(0.175245825779816)	7226(0.175107353151643)	7222(0.166541198989051)	29941(0.166262091582122)	9468(0.165620178830799)	60482(0.164836324308886)	1119(0.164600880592297)	255520(0.164544541504231)	57158(0.163639385209446)	112942(0.162419146946639)	59341(0.157603282120518)	5130(0.155833130129937)	360(0.15137266390244)	9517(0.149153427823681)	23437(0.148214348699725)	859(0.145824665591642)	8394(0.145334125035011)
4-Hydroxy-3-methoxybenzoic acid	8468	51316(0.223605483139291)	8455(0.210491111606341)	10987(0.206775694324046)	8528(0.197555218642816)	51250(0.197425812011195)	5705(0.195731559462334)	5498(0.195575910080442)	84717(0.194631664142754)	7201(0.19459289970474)	23168(0.194467174025226)	50813(0.193738754304829)	5743(0.192630730009936)	4537(0.192347818888212)	518(0.192347818888212)	9552(0.192347818888212)	55890(0.191983886815723)	7920(0.191365806306109)	408(0.189569571138767)	4924(0.189446475648126)	4489(0.187590970295979)	26260(0.186584824450816)	201456(0.186473961035884)	6468(0.186338800349409)	26224(0.184596483958416)	26190(0.180117417723518)	1645(0.178779421258397)	154(0.178388631370529)	282974(0.175040850813238)	8454(0.174272417696424)	56475(0.173947602733411)	8451(0.1737442931893)	8533(0.173111273312196)	81502(0.170922048144231)	55661(0.170706224748599)	285855(0.169677248697456)	84065(0.169517286020358)	5742(0.169328144467964)	10885(0.168725183441062)	6553(0.168203993949665)	84838(0.167961992165712)	130(0.167182384076431)	23099(0.16671078838735)	56254(0.165224786937939)	23178(0.165103013929324)	8519(0.164962124284564)	81873(0.162219886446995)	9978(0.161900329119028)	10871(0.160727289366189)
TanshinoneⅠ、ⅡA、ⅡB、Ⅴ、Ⅵ|TanshinoneⅠ	114917	51573(0.199408671655646)	11202(0.192917321107741)	54663(0.192917321107741)	121274(0.19009034700607)	167838(0.189829516901168)	6713(0.189315453610408)	9751(0.18926092587187)	134957(0.187463071084717)	29091(0.187401278178215)	6843(0.186048860505171)	6530(0.184806532068529)	496(0.18473507361056)	51699(0.178598957913322)	6804(0.17783898481791)	9066(0.177141712282747)	5997(0.17306521100548)	6620(0.171723669295085)	525(0.168049200442094)	54585(0.167434418137738)	1128(0.166126917220472)	7855(0.165308926933812)	4295(0.163139765804106)	2862(0.162951168431355)	5368(0.162843941140333)	4987(0.162280826735245)	6870(0.16181768899713)	6865(0.16181768899713)	9737(0.160484497137105)	1396(0.159961653864462)	6845(0.158288877520393)	6532(0.155851027379528)	230(0.155843078911827)	2869(0.155274391140742)	6813(0.15498545900475)	65265(0.15397657756847)	55638(0.153566857153505)	3268(0.145190780062921)	4129(0.144998603844129)	6531(0.142923884226683)	8673(0.142410681958272)	5187(0.141484564109549)	54221(0.138889160458596)	6645(0.138827925298562)	114928(0.136271338154708)	29(0.135664927308744)	57045(0.135622568930203)	1132(0.135599234205293)	3577(0.134704946855853)
Isoleucine	791	586(0.552515348545366)	587(0.480118781731535)	9521(0.47274762367267)	9255(0.460491466062163)	88455(0.441719069943877)	3735(0.418341709455008)	51520(0.407226879035011)	5917(0.403156223290506)	7965(0.395606659230489)	3376(0.386128252912967)	5859(0.385123528892774)	4090(0.379823035014433)	36(0.370950919242357)	1615(0.358833463678638)	54893(0.351458781994323)	4141(0.336767058313604)	2058(0.336320681099636)	51547(0.322571360765424)	151742(0.319791263376863)	2848(0.319791263376863)	10869(0.31736981644861)	85476(0.310962137895771)	2617(0.294742792244867)	51031(0.294054269968163)	4048(0.290790360051016)	7019(0.288607832555309)	55856(0.288506447606804)	6885(0.288468258104844)	10010(0.287068561388996)	8412(0.286991403163863)	55699(0.285353484986176)	23011(0.280674819807658)	645455(0.279391697909898)	2820(0.279056348122392)	1479(0.278745922704268)	3813(0.278227014700908)	4794(0.276703474556739)	7458(0.276121819261926)	64928(0.273585103966645)	9761(0.268665486729076)	63894(0.268063028837241)	65975(0.267432234224539)	84461(0.266994113633374)	92104(0.266791572338923)	9725(0.266791572338923)	56521(0.266791572338923)	226(0.266257322444984)	23760(0.265709499048868)
?glucose	5793	51106(0.383647909417114)	9583(0.383230872347708)	58478(0.383230872347708)	3018(0.381343467915657)	131474(0.37735623311749)	26521(0.373362849103493)	127703(0.372415126520503)	5442(0.363287825229398)	85366(0.352226904585041)	2975(0.34405913135851)	6210(0.332902455336606)	6193(0.327572257258111)	3458(0.317070366192992)	6232(0.315827154855071)	3032(0.311534823962689)	339965(0.308629258372221)	2140(0.30734973895726)	64841(0.304575461015788)	333931(0.301913143243627)	51110(0.301912484790524)	8704(0.301824887162534)	3906(0.300632147417779)	64772(0.300525178908555)	10597(0.299579419496902)	51388(0.299579182441996)	2683(0.298323046870327)	55577(0.296423524052188)	51172(0.295159582397935)	8972(0.293729203016754)	9099(0.291965961307152)	1896(0.287098322354134)	7784(0.285822173363588)	114815(0.285395256038605)	57829(0.285395256038605)	5545(0.285395256038605)	8703(0.277960138082328)	5973(0.275044024746234)	8576(0.264038389050429)	50511(0.261356498164901)	54882(0.252465837525362)	5537(0.248903762429258)	2548(0.246797156915608)	114088(0.245789758829262)	279(0.24568957693588)	1602(0.237358881263586)	22882(0.236798747556453)	9189(0.236382442062565)	5211(0.233267616165585)
Myristic acid	11005	6649(0.245217053507761)	252839(0.23488457208606)	10516(0.234272463654999)	11226(0.232889835356684)	8884(0.230675048697627)	9536(0.223298385599932)	5730(0.212475502481816)	5732(0.206192205957182)	5274(0.204860524051363)	18(0.203110047406861)	10321(0.196663613681859)	1(0.195506070554723)	6546(0.19484112022678)	10280(0.194286862888111)	7980(0.193327762608874)	388323(0.193140652873854)	1593(0.193140652873854)	29106(0.191213466281567)	1113(0.188240563997113)	7123(0.187329208157987)	5118(0.187250566343901)	1990(0.186325237607)	10725(0.184451474836554)	55974(0.183589129549426)	3911(0.181323690071558)	5731(0.179262334645977)	51393(0.178145024096393)	6678(0.177396524166483)	6710(0.176862037276565)	2900(0.17526091200688)	7299(0.173130631497283)	1638(0.173012585051241)	51601(0.169530328437848)	730(0.167640425479343)	587(0.167284192386937)	143425(0.166871842740156)	81554(0.16526228358127)	59271(0.165192029843539)	221241(0.165192029843539)	253461(0.165192029843539)	4018(0.163019724060936)	2901(0.162240420403983)	36(0.159126288837387)	9255(0.158477540084092)	55856(0.157302899627368)	29062(0.157065374015314)	2895(0.156709947872031)	10549(0.155709757503098)
Corymbotin	25240035	9536(0.243566158147497)	5732(0.235904505606047)	5731(0.220217822085967)	5730(0.212046016811031)	5737(0.206396567217652)	5145(0.205296452472907)	131890(0.205296452472907)	5158(0.205296452472907)	5733(0.187578682947193)	3652(0.181037248667455)	57658(0.17924002391913)	2976(0.17873336461034)	55811(0.175191107952984)	5739(0.169448388866562)	112(0.169191730192891)	1139(0.162699658619285)	1464(0.160603300049185)	50943(0.159114558785359)	1137(0.154070722010716)	80852(0.150850163409245)	2898(0.14991958739705)	7447(0.142683040280584)	79174(0.139343811449551)	7357(0.137817194190082)	1412(0.13630292129682)	9734(0.13600150655649)	255877(0.133544453302035)	5406(0.133267873640807)	8513(0.133267873640807)	5408(0.133267873640806)	1208(0.133267873640805)	112495(0.132636125278577)	2900(0.132027573966333)	5147(0.131233018529882)	6659(0.127200611661337)	56259(0.127102961813152)	909(0.126774940777366)	8499(0.125045813317675)	80142(0.123822069413618)	36(0.12373664013729)	2901(0.123517790324614)	721(0.123129657203239)	6336(0.122435477909404)	23426(0.122392126673172)	2895(0.121916172171478)	9328(0.121016285026006)	9329(0.120836344739084)	722(0.120097909019459)
Chrysin Ⅳ	5281607	4586(0.185922832547031)	56667(0.185502963623263)	79623(0.185484396199282)	3567(0.184991674636355)	4583(0.184972706241472)	79695(0.184516475423657)	170591(0.161850398724293)	2869(0.158837100339166)	10267(0.157857646318109)	84545(0.156188406192807)	4923(0.155848405165774)	10203(0.153299172676203)	282974(0.14909135070299)	1429(0.14776444159674)	7200(0.147407414698677)	56475(0.146365921054281)	201456(0.142150611184088)	26260(0.141793946852833)	26224(0.141730350723604)	6468(0.141721031507509)	1318(0.14140930509934)	156(0.140915328129927)	409(0.13931758146467)	26190(0.13789743298907)	55661(0.134924485265236)	285855(0.134385380520398)	359948(0.133949322084598)	9630(0.132803921709283)	5368(0.132584602945581)	571(0.132502538141593)	6553(0.13249147685561)	4987(0.132450212995389)	285489(0.132299242088412)	53840(0.132028178915395)	4295(0.131532850086737)	2862(0.131423513731286)	728(0.13122999786708)	6870(0.131093074736915)	6865(0.131093074736915)	4924(0.130882423019754)	6286(0.130414461006303)	9737(0.130374592580441)	4593(0.129996722955123)	23609(0.129130344040147)	8906(0.129128601685793)	2769(0.129028606466711)	130(0.128716669723386)	1396(0.128589477151273)
cis-Linaloloxide	529304	7110(0.330860381827137)	55827(0.320891910410309)	9604(0.309848447175753)	54957(0.305505298994023)	29893(0.305432476123086)	9328(0.302593437719606)	79915(0.301443342437148)	5883(0.299449139062078)	1044(0.29922882327472)	493829(0.29699421406526)	147339(0.29699421406526)	26147(0.29699421406526)	24148(0.294786618446788)	3416(0.294440143525314)	135458(0.294372048205382)	27043(0.293782137849902)	1050(0.29335576663963)	573(0.293256814878552)	54542(0.292727898109746)	5994(0.292706917678569)	168433(0.29198348408994)	222484(0.291427206688929)	112495(0.290073644552404)	6618(0.289878313226453)	54457(0.28987032968641)	23066(0.289777967906508)	136227(0.289628701556699)	9282(0.286778958207715)	10623(0.28494585777212)	152007(0.284888334377358)	4957(0.284888334377358)	9329(0.284534133798129)	5192(0.28432448805287)	6597(0.283303168085608)	64005(0.282846057369951)	90135(0.282552770384046)	84695(0.282164266160552)	11108(0.282124921749672)	7329(0.28180233145997)	1051(0.280962555476846)	255488(0.280710158289434)	291(0.280534421790477)	3148(0.280033113343818)	6599(0.280006036401265)	79611(0.279969212228436)	83861(0.27977645729454)	55088(0.27977645729454)	55146(0.27977645729454)
osodelphinine	494473	79611(0.240763703979039)	8805(0.238389107422635)	7044(0.237359737344784)	7556(0.237305650932072)	4298(0.237128133633085)	9604(0.23613687157956)	442867(0.233834557160034)	442868(0.233281862744149)	9083(0.233281862744149)	573(0.233049367877158)	89797(0.232880701556165)	5452(0.232030140696456)	1044(0.228807945550021)	152007(0.228607033514329)	4957(0.228607033514329)	3148(0.228145134713817)	54957(0.228100644900179)	7337(0.226062406588304)	6996(0.225907262172759)	64005(0.224359787205514)	9063(0.222725284036517)	10401(0.220686768779571)	2296(0.219568537992354)	51162(0.218672836979242)	50487(0.218544413033849)	463(0.218507997291462)	3223(0.218504915713464)	3234(0.218504915713464)	63974(0.218504915713464)	83937(0.218504915713464)	3232(0.218504915713464)	6618(0.218125736557675)	23066(0.2179226950631)	136227(0.21791213892738)	84901(0.217909524808856)	54457(0.217735512072554)	7227(0.217495476845114)	2928(0.217495476845114)	8031(0.217118644958089)	24148(0.21655396097431)	1050(0.215675313776787)	27043(0.21540937153616)	55837(0.214484161304706)	54345(0.214302134979003)	3237(0.214067938678812)	6047(0.213806305682979)	493829(0.212601068413803)	147339(0.212601068413803)
DihydroisotanshinoneⅠ	89406	1520(0.201076477393198)	1473(0.195215347587147)	6439(0.189430266242656)	1512(0.188603822759996)	632(0.187531917130451)	51573(0.181249848625888)	121274(0.179249153686625)	6713(0.178217039806219)	2677(0.175783510930272)	2158(0.175479414128256)	11202(0.174111412344394)	54663(0.174111412344394)	167838(0.171001469686606)	9751(0.170432393108587)	6530(0.170025679669842)	134957(0.168636851910678)	29091(0.168522884979342)	6843(0.167220232588241)	4537(0.166361112558452)	518(0.166361112558452)	9552(0.166361112558452)	496(0.165865984285323)	55890(0.165802356437777)	5997(0.164967707809379)	4924(0.164651738911142)	90379(0.164295841260076)	54876(0.164295841260076)	79269(0.163979018819682)	6804(0.161949396790416)	5743(0.160081341817877)	8858(0.159338727857863)	9066(0.158616941381639)	51699(0.15768733951734)	8519(0.151579254573119)	2150(0.150984394573108)	7920(0.149224311205933)	1723(0.147904623961525)	81502(0.147190303559199)	1128(0.145469039517139)	50813(0.145185643446247)	5742(0.144809287378279)	8451(0.141654108358844)	84065(0.141642307599407)	6845(0.141346942566053)	230(0.141180487763385)	54221(0.140666045694052)	6532(0.140629132831427)	6620(0.13965181042237)
5,7,2-Trihydroxy-6-methoxyflavoneⅨ	5322076	55661(0.218919702423955)	285855(0.217999142915706)	84717(0.217958592518251)	7201(0.217917494291032)	23168(0.217705022460327)	6553(0.215844633896281)	408(0.214787365722523)	4923(0.211064835544807)	84545(0.210825228609509)	130(0.209849252335675)	10203(0.20940568078631)	154(0.209301797772591)	10267(0.201990573509258)	7200(0.198994903651415)	409(0.194497236289298)	23099(0.193096034790944)	4489(0.192306837666001)	3795(0.189586792142958)	2769(0.187990668438115)	4842(0.183209933348068)	153(0.181683287821538)	4985(0.181549975468609)	1318(0.181192898321855)	54585(0.180467522560472)	827(0.179406152636701)	7855(0.17884903756678)	83874(0.178649501990182)	156(0.178171785307197)	5042(0.175391353614854)	728(0.174912488145133)	81844(0.174717954997414)	260425(0.170625360173867)	83539(0.170086769347073)	3973(0.168591073966364)	7049(0.16771616908345)	2652(0.165215462418224)	9630(0.164400757284104)	57453(0.164048396994603)	1445(0.161017913855975)	7555(0.160989562104243)	3762(0.157877208461855)	57030(0.157852045849314)	155(0.157180638030177)	3765(0.156026096710398)	4185(0.155581150543523)	3360(0.155510086568833)	6456(0.154688949244412)	2869(0.154181711467662)
Cis- 3-hexenol-1	5318042	5737(0.309137974794147)	5731(0.294583832502241)	6546(0.284576306388504)	5730(0.272725465174206)	10280(0.272342494998674)	2976(0.271267135767242)	5732(0.26473988157244)	9536(0.264238776224246)	5733(0.26181465218835)	3652(0.25843218043997)	1464(0.253571826195473)	112(0.245413813508676)	6710(0.245329332929936)	57658(0.245184887890486)	1139(0.243494781806662)	80142(0.24337935349211)	80852(0.239386333595712)	2898(0.228245659752391)	1137(0.223328405763473)	55974(0.223119183667447)	51393(0.218918337642728)	79174(0.207875914475649)	7447(0.206500972181385)	8499(0.202067672152181)	143425(0.199114475384685)	2181(0.198186656923757)	2891(0.195847195300466)	2901(0.195500330317401)	2900(0.195032560038151)	2895(0.194377709147821)	6659(0.194185009959144)	5792(0.190376409716215)	6711(0.187180175881794)	8694(0.187075409358364)	3099(0.184088802555791)	23426(0.183639185647293)	6386(0.177148333725287)	909(0.176932935424335)	29062(0.175824164492251)	10369(0.17560841808062)	8170(0.17456394878978)	9166(0.17456394878978)	5532(0.173332308442762)	64130(0.172610070119048)	56259(0.169899636782316)	1002(0.169646787082655)	7706(0.168099191040534)	5145(0.166955494651217)
Phenethyl alcohol	6054	4129(0.249748381353527)	167838(0.239841962412365)	9751(0.23958802769503)	134957(0.235757696126117)	29091(0.235588880093584)	496(0.234505287822614)	6843(0.233774771105967)	6530(0.231553018923468)	6804(0.229659226272305)	6531(0.228404895422111)	9066(0.227261869881122)	29924(0.225120559924893)	6622(0.218971695761299)	4128(0.213659143232515)	525(0.211287531945976)	6620(0.207215827453726)	6845(0.204265605560859)	3268(0.202843390113903)	55638(0.202650449501485)	6813(0.193863494327395)	8673(0.189948227985863)	4801(0.18957655826152)	4295(0.188378418155688)	2862(0.188165462850912)	6870(0.186155842856015)	6865(0.186155842856015)	5368(0.184827788345374)	9737(0.184601057320859)	1396(0.184254878656026)	4987(0.18422632137149)	4514(0.182248498412268)	5413(0.182083207656803)	63908(0.181030860713496)	2060(0.180960019363905)	11202(0.18028480787974)	54663(0.18028480787974)	51573(0.178215095333764)	65265(0.178105638522719)	6532(0.176177501199253)	1128(0.176051284085876)	10814(0.168262309090397)	57706(0.167289280106194)	25977(0.166422254920413)	375(0.166089521019649)	54585(0.164820900205336)	5187(0.16457942133873)	6860(0.163824490198049)	7855(0.163049075471637)
Harpagide	93045	8972(0.266860036084218)	3018(0.261223100707787)	85366(0.243511658806344)	3730(0.238595616452332)	1562(0.238595616452332)	2975(0.238341923552195)	5442(0.236755444642713)	339965(0.235624728028775)	9583(0.226108093963165)	58478(0.226108093963165)	51106(0.223763130829065)	6232(0.220124478839978)	127703(0.219290210408154)	131474(0.217522878030894)	6210(0.214790207421147)	26521(0.212899975936646)	6193(0.21209852859753)	8099(0.208248770221236)	2548(0.2065134207758)	50511(0.204182887427222)	5653(0.20413336538545)	10393(0.203847582662965)	11201(0.202995525537168)	51426(0.202968401200882)	2140(0.202756963295467)	9768(0.202616728968667)	11196(0.202614670975266)	462(0.202460887935402)	10600(0.201575386471722)	6773(0.201449112029728)	279(0.201251195366386)	84958(0.201158957838317)	5937(0.201077259660708)	5810(0.197906346076152)	64841(0.19679497923067)	55577(0.193992716577292)	3119(0.193617713128206)	10597(0.19345985340977)	51388(0.193459568220916)	3118(0.193371461539458)	137492(0.193024346507628)	114088(0.192566969029627)	3032(0.192306881729166)	9414(0.192302566914296)	5422(0.192269381002871)	51110(0.192122975895601)	333931(0.191982136747593)	8704(0.191927796495607)
Rosmarinic acid	5281792	84717(0.269268031026235)	7201(0.269237626679529)	23168(0.268985636400069)	154(0.265800870908388)	408(0.261955670455001)	155(0.254637972130896)	130(0.248143449150026)	5042(0.240050394936419)	23099(0.238785771369276)	7555(0.235289007340356)	81844(0.23435539653215)	260425(0.234207022105523)	55661(0.233182689635583)	57453(0.230911611336746)	285855(0.229929024353938)	10969(0.228006583524007)	6553(0.227768812191355)	6039(0.222087423862027)	94233(0.222087423862027)	283248(0.222087423862027)	153(0.215441002473763)	407(0.214775749324177)	3795(0.206747872270311)	4985(0.204860852460184)	3553(0.203733321337325)	28966(0.202482743506337)	83638(0.202125726343471)	90333(0.200710901648637)	10570(0.200675843812889)	4923(0.198865568807801)	114571(0.19732097519118)	28232(0.19732097519118)	1811(0.19732097519118)	2769(0.196496861215961)	10203(0.196140253083545)	27350(0.193285212833308)	84545(0.193154357263945)	57030(0.192490011590043)	57216(0.192381334592178)	6456(0.191662286793649)	10871(0.191405520757344)	9863(0.191004615005511)	9516(0.190999271147078)	6579(0.190475818498801)	22903(0.189882633191615)	5365(0.189382432798198)	5053(0.189084603134535)	51316(0.188234328129168)
Salvinone	130233	121274(0.233265035924663)	6713(0.232664949954054)	230(0.208281413324854)	84717(0.201150401317389)	7201(0.201117577167253)	23168(0.200779431619983)	157(0.186844107430551)	408(0.186371155599015)	130(0.183542666082791)	10203(0.182151032426728)	4923(0.181793906770876)	84545(0.178483244101354)	55661(0.176828301478031)	285855(0.176022120212628)	23099(0.17571465213643)	6553(0.174113246681977)	2769(0.169502283776251)	7200(0.168852149268455)	10267(0.165564734935823)	4985(0.164563436170554)	154(0.164461914652807)	1318(0.156502318877082)	8906(0.155220477349362)	414060(0.154640945848097)	259173(0.154640945848097)	26207(0.154202970023203)	23254(0.154110218685049)	156(0.153968412639755)	5042(0.15213759821694)	409(0.151214394961794)	90333(0.150605237921421)	11080(0.150207350436339)	4988(0.150009646475954)	81844(0.147828672559144)	57085(0.146943266616902)	114571(0.143983588032183)	28232(0.143983588032183)	1811(0.143983588032183)	260425(0.143458615520851)	5493(0.143279365397535)	155(0.143061537302723)	57453(0.141776254376872)	6579(0.141069664368535)	183(0.140041647853903)	22903(0.139288054051206)	185(0.139223190937703)	3795(0.138268572928759)	1269(0.137675876217239)
Liquiritigenin	114829	4547(0.328029109212684)	154(0.326010601912019)	5042(0.307842251268964)	84717(0.302646666517603)	7201(0.302609401054705)	23168(0.302259883595497)	81844(0.301650148133768)	408(0.293629876944486)	7555(0.293514547952551)	260425(0.289405022549964)	155(0.284546601875973)	57453(0.283757593326145)	6039(0.282712622692275)	94233(0.282712622692275)	283248(0.282712622692275)	130(0.278385439068386)	407(0.273942119206581)	55661(0.273074361204193)	285855(0.271864732640956)	6553(0.269854273740827)	23099(0.266712537677073)	9590(0.259512999332835)	3553(0.258232271987492)	10969(0.252526831668355)	153(0.244025473838146)	90333(0.241174260929693)	27350(0.23845264044119)	57216(0.238260036802298)	10203(0.237812862904192)	84545(0.237759184566836)	1445(0.237091871601361)	4897(0.236056232212305)	5420(0.236008446523868)	3360(0.234538918455745)	4923(0.234140104386117)	3795(0.233762493847126)	83737(0.233733822220227)	10871(0.233421747136761)	114571(0.233081346695242)	28232(0.233081346695242)	1811(0.233081346695242)	22903(0.232653889952663)	5365(0.23135402760763)	28966(0.228965267912392)	9368(0.228642518392017)	3645(0.22807927447621)	83638(0.227616500910606)	4842(0.227281767670391)
Glycyrrhizin|Glycyrrhizin acid|Uralsaponin A	3495|14982|128229	8805(0.497467254190058)	7556(0.496179924912522)	79611(0.483702450406754)	6996(0.48320022187249)	7044(0.481364165659334)	4298(0.481325339669332)	5451(0.471615686452883)	573(0.471072081428545)	9697(0.46591276299294)	6621(0.462142222414878)	9282(0.457810736927077)	3148(0.456375623765371)	5452(0.45549010472504)	51162(0.452233799664674)	9604(0.45135148583663)	84695(0.447258234958231)	11018(0.444761165942255)	57136(0.444754307459064)	83861(0.444726144213616)	55088(0.444726144213616)	55146(0.444726144213616)	10610(0.444726144213616)	79673(0.444726144213616)	54957(0.444363385795557)	23174(0.443757019305012)	6602(0.44347823418992)	143(0.443389418995476)	24148(0.441959726027506)	9063(0.441735225889104)	442867(0.440687508781198)	51111(0.440502565955881)	7337(0.440363610275939)	442868(0.440298674047337)	9083(0.440298674047337)	861(0.439966438651843)	3223(0.43964743945103)	3234(0.43964743945103)	63974(0.43964743945103)	83937(0.43964743945103)	3232(0.43964743945103)	11108(0.439069209618293)	3237(0.438350190596539)	1054(0.436820504824643)	5927(0.436326851761115)	2296(0.435648271469306)	3146(0.435192579002511)	2354(0.435024686504209)	7818(0.434831604778743)
n-hexacosane	12407	3652(0.23748122736933)	2976(0.225047768549501)	1139(0.220724405373989)	112(0.217890116811007)	57658(0.21148733899047)	1137(0.209624229434058)	80852(0.208562456768926)	1464(0.206540651638418)	2898(0.202590213053511)	7447(0.19676059372674)	79174(0.193814566075728)	9536(0.19168513486947)	1412(0.191326731892303)	50943(0.185017108711968)	8499(0.182693556291259)	2900(0.179357396827702)	909(0.173200931995096)	2901(0.171918566149059)	9734(0.17121557327249)	2895(0.169836025369974)	8694(0.168881698051759)	36(0.165553106052348)	5732(0.164215466442868)	721(0.162069733100881)	2891(0.161506400381199)	6336(0.1601700412765)	5731(0.1598917201135)	725(0.158403026194977)	10544(0.158377154779054)	56259(0.157898830420475)	5730(0.156827671614724)	64130(0.156531633092642)	1002(0.153175639976872)	29062(0.152301283421363)	5792(0.151430760147581)	6386(0.149444913483188)	23150(0.146680115015976)	132320(0.14321217768189)	9265(0.143132210335173)	923(0.139072169475022)	5733(0.13839490215855)	1000(0.135140720431206)	6711(0.133755852918892)	8933(0.132733727618347)	55374(0.132733727618347)	152815(0.131464738827094)	10369(0.131394065479141)	27111(0.130813073590748)
Uralsaponin B	163744	8805(0.477059550605279)	7556(0.475799407873642)	79611(0.46375248705517)	6996(0.463228970452849)	7044(0.461418234670949)	4298(0.461377428661801)	9697(0.452683767739843)	5451(0.451840832126935)	573(0.451123164016708)	6621(0.44265581346541)	9282(0.438235861234404)	3148(0.437570545901385)	5452(0.436665940327203)	51162(0.433552651342607)	9604(0.43268419018154)	84695(0.428517757716209)	11018(0.426050646017919)	57136(0.42604482670169)	83861(0.426018021135803)	55088(0.426018021135803)	55146(0.426018021135803)	10610(0.426018021135803)	79673(0.426018021135803)	54957(0.426006575851475)	23174(0.425066437805569)	143(0.424687798154629)	6602(0.424434071877411)	1054(0.42427431400991)	9063(0.423148178484049)	24148(0.423128153859523)	861(0.42308920589182)	442867(0.42253624485595)	442868(0.422155764178496)	9083(0.422155764178496)	7337(0.42191891644695)	3223(0.421732865749017)	3234(0.421732865749017)	63974(0.421732865749017)	83937(0.421732865749017)	3232(0.421732865749017)	51111(0.421623684849675)	11108(0.420504641028621)	3237(0.420442253309144)	55576(0.418184766748122)	5927(0.418169125122535)	2296(0.417828546225198)	3146(0.417447815988676)	2354(0.416622392441426)
Lysine	5962	3735(0.527555200055426)	9521(0.477523296364258)	9255(0.465561815102112)	384(0.430193468119647)	4947(0.427325541094236)	126638(0.422706812758108)	79613(0.419563549275759)	10201(0.418388431600783)	383(0.418339523990267)	483(0.413943559352411)	440026(0.413943559352411)	449520(0.412770858619485)	79893(0.412770858619485)	199720(0.411867040768206)	51686(0.410648746345961)	5859(0.402631168565477)	5009(0.395781146972236)	5917(0.393638905975819)	7965(0.388781116985781)	51520(0.388692140872422)	4946(0.379593918078268)	1828(0.379564145046426)	1607(0.366510030891569)	26167(0.366034888845832)	8689(0.364067169495776)	2058(0.353015924003517)	54726(0.349431885020783)	4141(0.340745373226477)	2717(0.338485062567231)	1615(0.334763074296016)	51068(0.328423326282401)	27019(0.326758862266559)	4953(0.325934337715275)	3881(0.322768951923777)	55856(0.320329852545497)	10534(0.320328682023452)	3884(0.319982850910157)	84656(0.317465888539223)	51031(0.314419089739045)	2628(0.311465699091556)	4048(0.310062913222104)	26292(0.306702888393858)	7019(0.30582538484114)	5048(0.30171616126261)	23011(0.298514235457598)	65975(0.297262800429519)	7458(0.296958098512516)	92104(0.296571228744364)
uralenol	5315126	154(0.214683863413161)	84717(0.208238718810354)	7201(0.208208426897493)	23168(0.208187671965388)	155(0.207335882611198)	4547(0.204228618701976)	90333(0.202825476687318)	7555(0.200701582016291)	408(0.199741774712661)	83874(0.198979651650402)	114571(0.198328404727912)	28232(0.198328404727912)	1811(0.198328404727912)	827(0.197992283292375)	5042(0.197856607013754)	2769(0.196405024579511)	81844(0.193726640542123)	6579(0.192832923941519)	4985(0.192367403604997)	23099(0.189948248335332)	9368(0.18967650542102)	130(0.188108515995602)	2302(0.187738979232136)	407(0.18198579973414)	112950(0.179091626071597)	6039(0.178205207845887)	94233(0.178205207845887)	283248(0.178205207845887)	9590(0.177819501164365)	55661(0.174882550567629)	3553(0.174864647358387)	285855(0.173840487543309)	260425(0.173253376649816)	1445(0.172980687252697)	6553(0.172708478920867)	11216(0.16998630035431)	84838(0.168794189345232)	132158(0.167244373403026)	2592(0.167229551283419)	8778(0.167229551283419)	28970(0.167229551283419)	744(0.167229551283419)	81932(0.167229551283419)	115761(0.167229551283419)	65999(0.167229551283419)	57707(0.167229551283419)	10643(0.166814418965154)	57453(0.16512033049131)
Neoisoliquiritin	5320092	10871(0.244278878527533)	7555(0.239408360214553)	5042(0.234543312527749)	81844(0.229220428789304)	407(0.221979749008472)	84717(0.220594410753777)	7201(0.220591276676136)	23168(0.220454294201946)	260425(0.220300137046842)	154(0.219927445210241)	6039(0.217875097125143)	94233(0.217875097125143)	283248(0.217875097125143)	23099(0.216319519754915)	3553(0.21582537867872)	130(0.214143080146338)	57453(0.21322125162499)	408(0.21146023576963)	6138(0.211115652063024)	150084(0.208392410907904)	285855(0.207540408943131)	55661(0.206607572605985)	6553(0.205800393433318)	57216(0.20494152994132)	9590(0.204926440287286)	10969(0.201874622599259)	79672(0.199815330195613)	83737(0.198321000468127)	27350(0.197916858302112)	124739(0.197063051550949)	9223(0.19450677174177)	6238(0.194228495833941)	146057(0.192410942923079)	84172(0.192407895675457)	84838(0.192106871904512)	1445(0.190959609868166)	10643(0.189749873494076)	155(0.189403554089645)	28966(0.189305232478468)	83638(0.189125882227716)	9863(0.187625616791476)	7988(0.187387605055558)	26233(0.18600121386686)	9683(0.185972542848056)	1147(0.184349694627836)	10570(0.183772951391408)	6456(0.18335052111008)	4489(0.183071227697748)
2-Dodecanone	22556	9536(0.244001818362248)	5732(0.237541666285936)	2976(0.192546236735689)	3652(0.190007611659153)	5731(0.181331165999975)	112(0.180209841630321)	5730(0.179490167270941)	5733(0.178888796304022)	57658(0.176933672216075)	1139(0.175035464125981)	1464(0.169365784386887)	1137(0.163598984897154)	1269(0.163212819011319)	80852(0.162037727178331)	4907(0.160775659760752)	112495(0.157965551020718)	2898(0.156966826248096)	6659(0.154430956079583)	9734(0.153892804901335)	7447(0.153255537795895)	9328(0.150609740397337)	79174(0.149428572746377)	23426(0.148468801300311)	3060(0.14757627724231)	3061(0.147442102111115)	114783(0.14386478391366)	55013(0.14386478391366)	1149(0.143840607690937)	55258(0.143769582110785)	9329(0.142500627803578)	51004(0.141995303982811)	909(0.140506217575583)	2900(0.140491304533088)	1412(0.14047585046906)	50943(0.139817862570851)	5737(0.139646909600901)	57719(0.139518207369621)	57017(0.139142152478455)	7706(0.138627368333248)	55857(0.137107707071577)	8499(0.136836650889851)	51412(0.136311542449626)	27033(0.136223529216442)	6756(0.134512974783882)	8028(0.133943114121515)	55722(0.133080662733397)	23493(0.132675554601077)	2901(0.130411836786727)
Serine	617	94103(0.573912095789566)	9517(0.551800821510389)	23437(0.550639799439899)	63826(0.505907404643363)	10558(0.499721298157479)	6301(0.496641259512018)	55969(0.464515562894097)	189(0.455683026508449)	9255(0.405445524738175)	283518(0.402023332949074)	386618(0.400721346922005)	9521(0.400040805360885)	875(0.385476581775078)	283987(0.383736175756165)	9513(0.381192261405946)	196374(0.381096991236159)	11262(0.381048162463986)	3735(0.370278244622934)	9627(0.368995259910983)	5193(0.365610231524921)	7019(0.365159189478056)	4048(0.362270338608841)	5805(0.361168674924307)	252995(0.359923362353696)	51547(0.359898440054408)	7965(0.355408929118926)	5859(0.353464499706599)	51520(0.353038658877683)	5917(0.348355441840771)	64928(0.347881403228902)	51534(0.341591364793201)	51031(0.33896828109265)	22933(0.33804273337998)	8192(0.334690105495784)	55856(0.332018513809156)	5830(0.330906894493664)	2058(0.329578003501717)	10330(0.324955621362951)	23011(0.324476286080355)	586(0.321167264171568)	7458(0.320530285587231)	1615(0.319923027219402)	493856(0.319229773254871)	9761(0.318458901735611)	389(0.315425076357071)	23428(0.314383069984014)	80155(0.31362170653646)	3813(0.311044709900505)
trans-trans-farnesol	445070	5731(0.332298484279297)	9536(0.332064115387372)	5732(0.323892701727216)	5737(0.321152879771675)	5733(0.306565324522093)	244(0.303282914724194)	112724(0.303280725260149)	5681(0.303208171487878)	5948(0.302658071414633)	5949(0.30264327314907)	84913(0.302487827827349)	145226(0.302254982979451)	1577(0.292288174451735)	9227(0.290803685097073)	5730(0.289941761462671)	6017(0.289391611760156)	5959(0.241213158743173)	80142(0.227770209196518)	8854(0.224924096234768)	54936(0.221612490306712)	339804(0.216872113081623)	57834(0.216872113081623)	166793(0.216872113081623)	5995(0.214508341699936)	3614(0.209381881064073)	26020(0.207832689701309)	3225(0.207283215802679)	3615(0.205352375411876)	5947(0.199944777724532)	9441(0.199321131021467)	51523(0.196577219000312)	6554(0.193806469893489)	119710(0.192422060097394)	5145(0.192021264139168)	131890(0.192021264139168)	5158(0.192021264139168)	2197(0.191840422319013)	26471(0.190683407756188)	5654(0.190102456518554)	4857(0.188054230801302)	51053(0.187873796090169)	55536(0.187799230530384)	79812(0.187799230530384)	216(0.18674629607612)	5547(0.185515431299363)	79413(0.183479692020319)	57733(0.18138361435504)	1382(0.180669805976307)
lupiwighteone	25246032	84717(0.244565137555946)	7201(0.24452732388785)	23168(0.244447972449179)	408(0.232550764321905)	10871(0.229507574411919)	23099(0.229436890832558)	55661(0.223767100184275)	154(0.223041138626709)	285855(0.222519759432796)	6553(0.221071721594801)	130(0.220747303565581)	7555(0.219649152956374)	5042(0.219403449017743)	81844(0.214888041670692)	155(0.211775054590858)	84838(0.20938901344061)	10203(0.209115187989229)	84545(0.209108161789809)	112950(0.20369117879145)	260425(0.203384217442524)	4923(0.202533091968178)	2302(0.20224475116807)	407(0.20113471978061)	7200(0.198144960069015)	4489(0.197705216495703)	6039(0.196640894979174)	94233(0.196640894979174)	283248(0.196640894979174)	3553(0.19622035892119)	57453(0.195829558993571)	90333(0.194008329810244)	114571(0.188261108009885)	28232(0.188261108009885)	1811(0.188261108009885)	83737(0.186981576814617)	6579(0.18563275113611)	409(0.185481753383921)	9440(0.183663850877801)	9683(0.18355104463107)	1445(0.181727175115636)	51316(0.180013025598369)	9368(0.179552994947051)	8727(0.178918028625939)	10267(0.178691745157016)	1024(0.177118282413468)	4897(0.176754562317487)	892(0.174841773758338)	6138(0.174632455811776)
Liquiritin	503737	5042(0.315421479224478)	154(0.311287531888541)	81844(0.308093857509389)	7555(0.306615196989529)	260425(0.304534370941681)	84717(0.303485041573506)	7201(0.303472348084414)	23168(0.303204930599646)	57453(0.298488435421862)	6039(0.29303721548734)	94233(0.29303721548734)	283248(0.29303721548734)	130(0.291757660294849)	408(0.290037615239984)	407(0.286643530290077)	23099(0.284984917966101)	285855(0.278743109301518)	55661(0.278245221660839)	6553(0.276428189238827)	4547(0.271483348430017)	9590(0.270692422420315)	57216(0.269575427212294)	155(0.264617081270823)	150084(0.263878731964039)	28966(0.260377734640661)	83638(0.259326408173399)	3553(0.258695686623941)	27350(0.258356081754766)	10969(0.258203278782235)	9223(0.256633429252892)	6138(0.256508507903941)	83737(0.253461676377309)	10570(0.252727016431169)	10871(0.251626202258348)	57030(0.251595621480207)	6456(0.250984687414868)	22903(0.250021920406541)	9863(0.248091174370994)	5365(0.248059853663375)	1445(0.246985235023553)	4897(0.246852217164861)	9683(0.245845609786567)	153(0.245784744431139)	5420(0.245416665022107)	25975(0.243457319891153)	3360(0.239395760397609)	11079(0.233988200419505)	6457(0.232479442340538)
Pinene	6654	6996(0.588637687254203)	8805(0.564870662673468)	51162(0.563082929193808)	7556(0.560739104684541)	5451(0.559783182195347)	5927(0.557565996550954)	79611(0.555726522366011)	573(0.554168505826727)	7044(0.55158185318161)	4298(0.551450354587223)	6621(0.54648424474642)	6602(0.54578643332958)	5452(0.52421941879382)	442867(0.50928060674034)	442868(0.508891584853544)	9083(0.508891584853544)	7337(0.507063352630893)	3236(0.50550981837141)	6595(0.498032753477403)	3148(0.494514934779043)	9282(0.494387449412887)	84695(0.494238613994445)	83861(0.490647295542767)	55088(0.490647295542767)	55146(0.490647295542767)	10610(0.490647295542767)	79673(0.490647295542767)	57136(0.490640537578514)	11018(0.490599630678821)	23174(0.488288041228361)	10499(0.488042803926191)	51523(0.4874514109002)	143(0.487252821083524)	57719(0.48686554426408)	57017(0.486848223159543)	51412(0.48655610948062)	9604(0.485239456706416)	11108(0.482770865559533)	1044(0.481922857984294)	51111(0.480461622229094)	1050(0.477687533056907)	2709(0.476648094033112)	9063(0.476580464923307)	9697(0.476344413715688)	2354(0.475680090338738)	25833(0.47448827434069)	4774(0.47448827434069)	116519(0.474068677632817)
Tanshinlactone	10264769	51573(0.19986622613683)	11202(0.193388158586219)	54663(0.193388158586219)	167838(0.190041066651568)	121274(0.189550261337217)	9751(0.189514719986696)	6713(0.18878916850868)	134957(0.187671475429095)	29091(0.187602015779591)	496(0.18498858464383)	6530(0.184880214975509)	6843(0.183879426933961)	51699(0.179145869175757)	6804(0.178363054601754)	9066(0.17750553172024)	5997(0.173290325059479)	525(0.169405668717525)	1128(0.16654089828251)	54585(0.166410871606668)	6620(0.165992004838293)	7855(0.164268346255414)	4295(0.162499013763162)	2862(0.162299469415523)	5368(0.162217899441842)	4987(0.161649595396036)	6870(0.161158230703737)	6865(0.161158230703737)	9737(0.159747838496184)	1396(0.159314991706452)	6845(0.158635724750666)	6532(0.156074086481111)	230(0.155551692864971)	6813(0.155443666141214)	55638(0.154080897107597)	65265(0.153388197527054)	2869(0.149033677217833)	3268(0.145304766763143)	4129(0.144952646313356)	6531(0.143363103430137)	8673(0.142945570953626)	5187(0.141319457418345)	6645(0.138866887700182)	54221(0.138537534745197)	29(0.136198759292423)	63908(0.136056579722574)	57045(0.135968372088038)	1132(0.135684812072089)	3577(0.135215788896689)
6-o-Acethylharpagoside	6325458	23062(0.168146991796342)	4775(0.15969425858291)	10930(0.155967355937197)	3730(0.155492149904228)	1562(0.155492149904228)	10565(0.154963252188717)	51155(0.154518763984987)	55240(0.154322868454707)	339(0.153840532746387)	53822(0.151376858364288)	10124(0.150239754050267)	978(0.150239754050267)	23515(0.150239754050267)	203260(0.149905023024339)	5348(0.149116930285938)	51503(0.148553680222643)	5965(0.148013775483111)	54467(0.14782559321343)	8910(0.14725166143659)	10844(0.146447907050127)	6554(0.140849954213461)	6421(0.140491458937569)	1140(0.139213520794279)	119710(0.138965190426687)	3460(0.138712102587011)	476(0.137330845191463)	6383(0.13710287477838)	477(0.136964515517003)	997(0.135465224586098)	23215(0.13522685091919)	9716(0.134078381725184)	79866(0.133725949173818)	8028(0.13365416223954)	6756(0.133532219020124)	7073(0.133009205422953)	79840(0.132861025130099)	6871(0.132798511678272)	1059(0.132536383578697)	10980(0.132036652952935)	6318(0.131397742736926)	7518(0.131378391863837)	4857(0.131249870118606)	11075(0.131043650435222)	10180(0.130931830968595)	10043(0.13054926966713)	3218(0.130422679848068)	9414(0.130234376496149)	158399(0.130198015163304)
TanshinoneⅡA	164676	157(0.164523842024907)	414060(0.145408839833265)	259173(0.145408839833265)	525(0.141499394250765)	26207(0.141207037204948)	2769(0.140272585088157)	57085(0.135100457480036)	183(0.132128005437862)	624(0.131467644285479)	84717(0.13037800503236)	7201(0.13035089621686)	23168(0.12999989467406)	121274(0.12970863806197)	6713(0.129024507647645)	185(0.127394056915423)	23254(0.127012759566351)	4985(0.126034568564012)	4142(0.125627165911167)	4988(0.125187281241009)	130(0.124191403692634)	115727(0.123731134281302)	90333(0.122270535547534)	230(0.118837556075448)	114571(0.118592934219108)	28232(0.118592934219108)	1811(0.118592934219108)	4923(0.118268724935705)	84218(0.118214633056196)	11080(0.117411665857136)	4986(0.11601862401561)	8906(0.115239982801129)	156(0.11519182620616)	408(0.114707285161593)	186(0.114173012051105)	1318(0.113968007046089)	221527(0.113254087353033)	6579(0.113118301749437)	1269(0.112368611829064)	23099(0.112005805322453)	5868(0.112000824435991)	5493(0.111916062118384)	124056(0.111571308753345)	22903(0.111459384171182)	1636(0.111176119275653)	10203(0.1110999457893)	1241(0.109791044215333)	55661(0.109656207439255)	285855(0.109343936374259)
sucrose	5988	3018(0.285876166369987)	51106(0.269826227893556)	9583(0.269586652391613)	58478(0.269586652391613)	5653(0.268279669300886)	8972(0.267211395593967)	5442(0.265754452541869)	3730(0.263047094954398)	1562(0.263047094954398)	127703(0.262763341651256)	131474(0.262628065687767)	85366(0.261662503268441)	2975(0.259175211488037)	26521(0.258704122393824)	6210(0.24246326034032)	339965(0.241837234004852)	6193(0.23998455434125)	6232(0.236768469356031)	64841(0.232453222268777)	2140(0.230745751178354)	50511(0.229998231617641)	51426(0.225650073701559)	9768(0.2252286188801)	11196(0.225185509533421)	8099(0.224016243276086)	51110(0.222794691177155)	333931(0.222785110548937)	8704(0.222684280147456)	3906(0.222043062334671)	10597(0.221950124638043)	51388(0.221949873571149)	64772(0.221536603448679)	55577(0.219813412252611)	3458(0.219456369042024)	3032(0.219049747287758)	2683(0.218132924841408)	51172(0.216157152540823)	5937(0.214596953330201)	2548(0.212196544354095)	279(0.210441785125762)	7784(0.209360205647573)	1896(0.207811017869587)	114815(0.207392147018272)	57829(0.207392147018272)	5545(0.207392147018272)	276(0.207031958482612)	462(0.205940375268849)	5973(0.205501999864723)
Methyl linoleate	5284421	5732(0.317245930332323)	9536(0.271749885364497)	5737(0.268327577550702)	6546(0.267293567897316)	55974(0.265056142162177)	51393(0.260626059473721)	5733(0.258564892053548)	10280(0.255293288288256)	143425(0.253890639923746)	5731(0.24859512081387)	5730(0.24393957784852)	8170(0.215471649161426)	9166(0.215471649161426)	6710(0.2084770840087)	388552(0.181461224725286)	55330(0.181419805899)	63915(0.18072096540687)	80142(0.176674547194525)	7442(0.17381907419517)	353355(0.160505856532608)	11162(0.160505856532608)	92689(0.160505856532608)	115294(0.160505856532608)	29953(0.158814010882857)	5532(0.146707922421736)	2181(0.145887760614434)	5145(0.145343013386281)	131890(0.145343013386281)	5158(0.145343013386281)	3652(0.13156702308149)	5739(0.131213810434947)	255877(0.130568860869333)	2976(0.130546314790614)	60468(0.128569896444656)	55432(0.128112781323288)	9362(0.125790014968966)	23557(0.124094825244173)	55811(0.122535499150759)	112(0.120751446690666)	1139(0.115745141663443)	57658(0.115319102397471)	57479(0.114662257253871)	80852(0.112654883130429)	29970(0.11129280484541)	1464(0.11040619927671)	1137(0.109832556514979)	7447(0.107157816041316)	2898(0.105415982817017)
HydroxytanshinoneⅡA	5318350	84717(0.205334265129532)	7201(0.205329743230711)	23168(0.204947488502913)	28966(0.197822867261375)	57030(0.197157413241015)	6456(0.196364929132835)	83638(0.196087473576579)	130(0.19554471690051)	260425(0.193997856596209)	25975(0.19258742530938)	57453(0.191243796012198)	10570(0.190748123195944)	4897(0.188959504009911)	22903(0.18810254409036)	9223(0.187150662492747)	150084(0.18585513532985)	5365(0.185133868905193)	23099(0.184860267865047)	9863(0.18480075364994)	408(0.183977365103834)	153(0.18204596282475)	6457(0.179170897140582)	6138(0.178129229224773)	285855(0.172547141388347)	11079(0.171428886580918)	55661(0.171418612672853)	6553(0.17023024595046)	90333(0.169774248538756)	5042(0.169345941331254)	57216(0.169154887724991)	3502(0.168935890089414)	10675(0.168935890089414)	114571(0.165896377071244)	28232(0.165896377071244)	1811(0.165896377071244)	9228(0.165107958588971)	8325(0.164313744545037)	81844(0.163488058557832)	6039(0.162402281524495)	94233(0.162402281524495)	283248(0.162402281524495)	27350(0.162133949007889)	6579(0.159386579576004)	407(0.157915569307125)	10228(0.155640630746556)	154(0.154425826035388)	7555(0.153305871188681)	57120(0.149160884671645)
p-Methoxycinnamic acid	699414	81873(0.231870402921196)	10912(0.22337619659748)	1647(0.214619847155419)	83641(0.212766326889605)	10474(0.210560934992425)	10069(0.210234247467122)	10062(0.192661497089962)	56904(0.192213835973216)	4135(0.191600906803826)	11214(0.191461200655092)	6604(0.191257664335594)	83758(0.190525933091053)	51364(0.190520462236526)	8332(0.189623186171392)	8727(0.188443233105616)	30836(0.188096788526383)	8431(0.187552514084043)	10987(0.187237604522073)	83714(0.18685136011751)	9971(0.186432416760261)	8455(0.186224184062254)	6256(0.18518596190404)	84838(0.184126860150455)	129685(0.183317805209516)	84962(0.183141356186359)	7068(0.180010058728389)	55629(0.17817896259743)	9862(0.177872667699172)	51316(0.17768906490586)	266743(0.176647938045411)	553115(0.174684332863763)	51250(0.174256220665209)	6258(0.174222060339407)	4616(0.174138344900232)	7707(0.173592929197605)	51102(0.173572843665786)	8528(0.173149290905404)	5498(0.172752625555754)	29982(0.172707088437523)	54998(0.172581200346514)	26524(0.172568839933494)	1854(0.172516637085228)	26548(0.171917315310543)	10871(0.170788958986522)	83440(0.170782165325255)	23421(0.170570899508464)	23090(0.170475644340346)	9025(0.170073032395577)
demethylcoclaurine	165901	154(0.315767711190631)	84717(0.306957110804458)	7201(0.306935994058755)	23168(0.306599820271401)	408(0.299324016660828)	4985(0.280430004059096)	5042(0.280260219634593)	130(0.279358578810171)	55661(0.277803109526933)	285855(0.276447579643076)	6553(0.274636996664208)	81844(0.274363637698631)	2769(0.2731202696869)	155(0.272568424047927)	7555(0.271793980063249)	260425(0.270845835240307)	23099(0.268929252566384)	57453(0.262493538758751)	6039(0.255370253613464)	94233(0.255370253613464)	283248(0.255370253613464)	90333(0.254363263478506)	10203(0.252474967134168)	4923(0.251739269085778)	153(0.250298600007898)	84545(0.249999929775242)	407(0.248479852063421)	114571(0.247916112964642)	28232(0.247916112964642)	1811(0.247916112964642)	10871(0.241553606854652)	7200(0.241515038705495)	9368(0.239883862027383)	6579(0.239328473570305)	3553(0.238044381774238)	409(0.23051020703491)	28966(0.230168280452989)	83638(0.228782040344075)	156(0.228526172820574)	10267(0.227394889387721)	10969(0.225065415017953)	27350(0.224896160996409)	10570(0.22412786462206)	83874(0.223567537512885)	6138(0.222801999243494)	85027(0.222332203600912)	55266(0.222332203600912)	55850(0.222332203600912)
beiwutine	51027706	81027(0.293687922692152)	7272(0.287675178702201)	566(0.260497936844638)	63970(0.242675584076688)	8739(0.241166383745694)	662(0.236785423901937)	64112(0.232492597852364)	79370(0.232419204308643)	663(0.228651639370231)	51283(0.223501372768869)	1780(0.222495967820353)	9445(0.221953815349679)	638(0.221388094482471)	9088(0.219701505889998)	5366(0.218212509059947)	7444(0.21667473464291)	7009(0.214111890116089)	665(0.213481720440249)	6336(0.206380696631206)	4674(0.20200593228702)	56344(0.20200593228702)	57099(0.199607937119911)	7536(0.198754108643023)	5827(0.190261454872889)	132320(0.190249093243637)	5534(0.187842203875174)	9774(0.186795392593189)	10017(0.182938079890216)	1128(0.181648287499797)	90427(0.181636468765405)	5500(0.176830280993396)	5524(0.174498741856466)	4295(0.173596516457577)	7837(0.173425643900424)	9531(0.173285492035253)	2862(0.173257399775874)	6870(0.173152402146036)	6865(0.173152402146036)	84290(0.173139868140981)	5368(0.171593143841818)	4987(0.171549615657967)	1396(0.171455501238804)	2267(0.171434377059375)	9737(0.170703131718406)	10572(0.170100692235091)	113277(0.168278878480924)	375(0.168206580859469)	114928(0.168059278511251)
Harpagoside	5281542	8972(0.182581400997898)	3730(0.180138696266792)	1562(0.180138696266792)	6383(0.177868510871726)	3018(0.175264803256143)	462(0.173598802711512)	5348(0.173413349212287)	5653(0.169580060405571)	84958(0.165741406798855)	9583(0.159044768057437)	58478(0.159044768057437)	279(0.157180772436679)	51106(0.156944930461788)	2548(0.156102337590556)	339965(0.153392511089842)	131474(0.153316910698406)	5442(0.153228675075965)	26521(0.153018656538322)	53822(0.152880731668713)	6476(0.152710102049574)	654817(0.150304718519927)	10565(0.148452156262012)	477(0.14787997561664)	51172(0.147451016081673)	9768(0.146744594835415)	11196(0.146668243622569)	51426(0.146628632774918)	127703(0.146183543828484)	64772(0.145976573896962)	64841(0.145925853433811)	51110(0.145882127477077)	333931(0.145557675177628)	8704(0.145472938705048)	5937(0.144415664504486)	6773(0.144355688646131)	85366(0.143623166737342)	55240(0.143568797917787)	476(0.143504846851937)	7784(0.143398626114898)	51388(0.143195480263134)	10597(0.143195345916727)	114815(0.142738064284267)	57829(0.142738064284267)	5545(0.142738064284267)	5422(0.142645423211005)	3906(0.142592661028074)	4131(0.142282266878954)	55577(0.141332325016658)
n-heptacosane	11636	3652(0.23748122736933)	2976(0.225047768549501)	1139(0.220724405373989)	112(0.217890116811007)	57658(0.21148733899047)	1137(0.209624229434058)	80852(0.208562456768926)	1464(0.206540651638418)	2898(0.202590213053511)	7447(0.19676059372674)	79174(0.193814566075728)	9536(0.19168513486947)	1412(0.191326731892303)	50943(0.185017108711968)	8499(0.182693556291259)	2900(0.179357396827702)	909(0.173200931995096)	2901(0.171918566149059)	9734(0.17121557327249)	2895(0.169836025369974)	8694(0.168881698051759)	36(0.165553106052348)	5732(0.164215466442868)	721(0.162069733100881)	2891(0.161506400381199)	6336(0.1601700412765)	5731(0.1598917201135)	725(0.158403026194977)	10544(0.158377154779054)	56259(0.157898830420475)	5730(0.156827671614724)	64130(0.156531633092642)	1002(0.153175639976872)	29062(0.152301283421363)	5792(0.151430760147581)	6386(0.149444913483188)	23150(0.146680115015976)	132320(0.14321217768189)	9265(0.143132210335173)	923(0.139072169475022)	5733(0.13839490215855)	1000(0.135140720431206)	6711(0.133755852918892)	8933(0.132733727618347)	55374(0.132733727618347)	152815(0.131464738827094)	10369(0.131394065479141)	27111(0.130813073590748)
rutin	5280805	7201(0.265314207633076)	84717(0.265312216972901)	23168(0.265252735035494)	10643(0.25416834448675)	7555(0.253519736338152)	408(0.253039481598693)	23099(0.253038935476777)	6138(0.248653143311601)	5042(0.244209124356057)	130(0.242806564314611)	285855(0.241900249863165)	55661(0.240849895417344)	6553(0.240280384824113)	260425(0.239633697442929)	81844(0.238571261330072)	154(0.23759234775745)	124739(0.237108554384839)	79672(0.235763879306272)	10871(0.23475710270859)	407(0.233034529348773)	9223(0.229743515806321)	57453(0.229137413809235)	150084(0.227576082569492)	155(0.226759218592244)	6039(0.223846099538819)	94233(0.223846099538819)	283248(0.223846099538819)	83737(0.220262489777642)	6456(0.218149299953649)	9689(0.217418315357868)	9863(0.216631656233192)	57030(0.216548641387138)	146057(0.215053138336106)	6137(0.214026096416866)	57216(0.212836011582104)	28966(0.212465825542)	83638(0.212183305176769)	10521(0.211071277524938)	3553(0.210812416541328)	25975(0.210048350387307)	5940(0.209125282214569)	9590(0.208579007049408)	4489(0.208518669979343)	9683(0.207316376545456)	10570(0.20680388633156)	1445(0.205222543661233)	84342(0.204861278901677)	6217(0.204807756786472)
Isocryptotanshinone	626608	1473(0.220327838961809)	6439(0.219756102504089)	632(0.218047441877968)	1512(0.217928921902898)	1723(0.200476433750646)	2677(0.198861392011428)	1520(0.196209785662628)	2158(0.191566122965405)	8858(0.166812180038916)	5624(0.151794090911717)	2769(0.135275124024925)	2150(0.13385692376521)	1509(0.1307045263866)	525(0.128708761520736)	5627(0.126311431804256)	4986(0.125685076002966)	10972(0.125517395588347)	6843(0.125455459925391)	10544(0.124859154657398)	6530(0.123316022967001)	2157(0.122360744812921)	22915(0.121620496038803)	11093(0.121464389800626)	167838(0.121065141195248)	9751(0.120730466524287)	6532(0.120692939865069)	134957(0.120178297988099)	4985(0.120016398242041)	29091(0.1199536332151)	725(0.119174947485935)	157(0.117432202659741)	496(0.116749064650145)	4988(0.115433397637198)	5271(0.114437910666273)	85027(0.114013933040124)	55266(0.114013933040124)	55850(0.114013933040124)	4295(0.113522101922564)	2862(0.11326304718157)	5368(0.11316237009825)	23254(0.11273447269823)	4987(0.112567779299509)	6804(0.11200549897313)	26580(0.111662436570306)	9066(0.11134267433027)	6870(0.111181405127967)	6865(0.111181405127967)	2153(0.110345581050275)
Tanshindiol A、B、C	11056055	84717(0.224123328852779)	7201(0.224088548830268)	23168(0.22373959453555)	130(0.221996013680018)	22903(0.213209516376951)	4897(0.211401477608804)	6456(0.211361867581827)	5365(0.210099353101892)	57030(0.209633424831987)	57453(0.207179574947932)	260425(0.206939576712058)	23099(0.205838772703224)	153(0.205622160953141)	28966(0.205128227104054)	408(0.20339768493421)	83638(0.203214744903063)	25975(0.200848125832656)	55661(0.200092712902819)	285855(0.199267323160892)	10570(0.198263039573625)	6553(0.197051620260476)	9228(0.194705641946601)	150084(0.19221794231959)	9223(0.190229532487027)	2869(0.186673734759319)	9863(0.185746738621607)	57216(0.185334811308386)	6457(0.185314294195944)	5042(0.180962664116275)	2870(0.18056313864859)	1318(0.180153556474333)	154(0.179502737363686)	3502(0.176487841141367)	10675(0.176487841141367)	27350(0.176101303428997)	81844(0.175414648239548)	6039(0.175189068922476)	94233(0.175189068922476)	283248(0.175189068922476)	4923(0.174748038643342)	11079(0.174482722766557)	1445(0.171995775333311)	8325(0.171729567016816)	10203(0.168114884918048)	54585(0.167118996111028)	8906(0.166056963485881)	10267(0.16584986596912)	84545(0.165657931373213)
sigmoidin	73205	4547(0.519666241230504)	154(0.306388181684995)	5042(0.291433093926734)	155(0.289458560392003)	7555(0.288038868059414)	81844(0.286284083789119)	84717(0.268233959616188)	7201(0.268204960407369)	23168(0.26799400421668)	6039(0.267302073583532)	94233(0.267302073583532)	283248(0.267302073583532)	408(0.262140203857917)	260425(0.261708769951474)	407(0.261652038785657)	9601(0.259771940562201)	3553(0.257218873517486)	57453(0.256133551724122)	9590(0.252712342641198)	23099(0.241637186560888)	3360(0.238087755334195)	55661(0.235154720385352)	285855(0.233913226511748)	130(0.233812489596629)	6553(0.232724851923006)	9683(0.226695457613616)	27350(0.22613570530676)	1445(0.225490402281164)	5420(0.224772429201146)	90333(0.223873478493111)	83737(0.223623305331605)	57216(0.222867416377639)	83874(0.222827958055254)	114571(0.221824905272674)	28232(0.221824905272674)	1811(0.221824905272674)	10969(0.220782679254242)	827(0.220133481308879)	4842(0.215950311898635)	22903(0.214755888261792)	6579(0.214246859014407)	5365(0.213699928467855)	9368(0.213345333921452)	9351(0.212467465780029)	3645(0.212251152760106)	4897(0.210763445322465)	6138(0.210540428768586)	153(0.205959914095361)
Salvilenone	389885	121274(0.212461971323915)	6713(0.211420980357463)	8519(0.191969417726793)	4537(0.183224456689217)	518(0.183224456689217)	9552(0.183224456689217)	55890(0.182819610227019)	5743(0.179839775506192)	1520(0.177337515407719)	230(0.171094843271295)	4924(0.170591420190852)	7920(0.168925449911229)	81502(0.167947465712426)	50813(0.167110975552333)	84065(0.165421549339542)	1473(0.163193081362166)	9978(0.16277215381968)	8451(0.161150926081935)	6439(0.156523187473651)	1512(0.156325476095306)	632(0.156219975513943)	5742(0.154837451255577)	90379(0.153474943359923)	54876(0.153474943359923)	79269(0.153220566983791)	2158(0.150456746102774)	2677(0.148642863400484)	8533(0.146423908413425)	8858(0.138574050801057)	414060(0.138232177154499)	259173(0.138232177154499)	26207(0.13554683017759)	2150(0.131323588979634)	57085(0.131232988151111)	26272(0.130429273808943)	26259(0.129829844369751)	282974(0.128938775082898)	6468(0.127860665791724)	201456(0.127788063188727)	8455(0.12778630885118)	10430(0.127620824576176)	26260(0.127230622499308)	56475(0.126025166351162)	26232(0.124854541035541)	6530(0.12403566030676)	51250(0.123785180756463)	26224(0.123545396881395)	167838(0.123515932914757)
Wogonoside Ⅳ	29927693	84717(0.159905456502262)	7201(0.159877723654777)	23168(0.159729343750036)	94086(0.158425277041559)	2091(0.155501322169517)	282974(0.155197571656713)	130(0.154729843734339)	56475(0.154316638491668)	10664(0.152486251295249)	408(0.152242842795515)	23099(0.150928458768261)	26260(0.150402038852414)	201456(0.150069207257496)	6468(0.149707282310766)	10643(0.149596312951646)	170591(0.1492867769457)	26190(0.148824927931433)	5257(0.148308706759301)	26224(0.14756440758396)	9221(0.147273952820351)	55661(0.146900472182039)	81620(0.146629643011513)	8493(0.146225744048725)	285855(0.145049133855068)	6949(0.144699137669915)	79009(0.144647293871317)	56667(0.144637504670251)	79623(0.144587390857922)	4586(0.144547352789495)	4583(0.144504055531282)	1677(0.143491143742739)	4489(0.142853005033494)	6553(0.142547749541877)	7268(0.142248085706767)	3567(0.141788895029683)	23506(0.141219070934132)	3006(0.140942869471163)	79695(0.14074762937156)	8454(0.140576552405345)	134353(0.140432180659749)	3795(0.140132813732129)	22828(0.138673127139308)	1660(0.138363620545261)	112950(0.137972714890815)	5042(0.137795838698235)	154(0.137756673030546)	81844(0.13687745531712)	3836(0.136857131835506)
ferulic acid	445858	84717(0.214174571011825)	7201(0.214134252797288)	23168(0.214130874405715)	154(0.212009532760939)	408(0.211850002980414)	84838(0.195078062195299)	55661(0.191785881554135)	285855(0.190748272184223)	9516(0.190369026439336)	6553(0.189216219349732)	130(0.188551594549697)	10885(0.185897608570954)	3795(0.18516264843189)	23099(0.183689854168273)	4489(0.183559525666009)	5042(0.181918324504212)	10871(0.181326550008765)	4985(0.179832963855651)	81844(0.177940363067268)	7555(0.177918612757745)	83874(0.175818163132197)	827(0.175536682293251)	155(0.174536373316354)	260425(0.173191714371465)	84545(0.171708894211663)	10203(0.171138940834883)	4923(0.170499912400729)	83641(0.168822445582811)	7068(0.167678864475368)	4842(0.167353832998113)	10474(0.167192278896057)	57453(0.166009373505774)	1445(0.165419953916375)	51316(0.165215725520006)	5744(0.165122208625548)	2769(0.165109974510474)	407(0.164758011120377)	81873(0.16427667603554)	7067(0.163293873488013)	90333(0.16303408072144)	6039(0.162703594493958)	94233(0.162703594493958)	283248(0.162703594493958)	11214(0.161477453737129)	7200(0.161005979748662)	409(0.160802341015244)	9590(0.160295152000089)	5138(0.160205239027487)
Danshensu		84717(0.315627981687423)	7201(0.315592021456517)	23168(0.315365425207637)	154(0.308690585348644)	408(0.308016885298236)	155(0.298550359247901)	130(0.285572254644097)	23099(0.285249091392796)	260425(0.278396241595067)	5042(0.276372438247096)	7555(0.275171878692782)	57453(0.273314187832827)	55661(0.272979912599639)	81844(0.270431341093366)	285855(0.268970073184676)	6553(0.267000786671744)	153(0.261544086103953)	6039(0.258050021119096)	94233(0.258050021119096)	283248(0.258050021119096)	407(0.250153131628235)	83638(0.246042541866864)	28966(0.246034004001808)	10570(0.245337855445037)	10969(0.239957972239553)	9863(0.2394480147041)	5053(0.238588103416773)	3553(0.238503870422605)	3795(0.238413539709314)	57216(0.238217318855099)	4985(0.236371824582938)	6456(0.235890022422283)	57030(0.235475809688793)	114571(0.234049583185714)	28232(0.234049583185714)	1811(0.234049583185714)	90333(0.232940636782531)	2769(0.23137114204175)	25975(0.230473679121072)	22903(0.228965413936606)	5365(0.228453338464855)	9223(0.227500972300892)	6579(0.225098383461178)	27350(0.224639139414602)	6138(0.223826973314652)	4923(0.222872375749202)	10203(0.22276056905293)	150084(0.222674754811183)
Ethyl linolenate	6371716	6546(0.444899286529329)	10280(0.438309108053346)	55974(0.384585146070774)	51393(0.378599698936301)	143425(0.367535627383856)	6710(0.354462835299302)	8170(0.323060326489837)	9166(0.323060326489837)	353355(0.281712962034572)	11162(0.281712962034572)	92689(0.281712962034572)	115294(0.281712962034572)	29953(0.280121696416828)	388552(0.275845674559305)	63915(0.27520313868142)	55330(0.274169518905125)	7442(0.266063870049749)	2181(0.265437432957132)	1636(0.243644546992732)	29970(0.226436153512267)	287(0.220950653571363)	23557(0.216825419515575)	5532(0.215632332053066)	2864(0.203861564752708)	55432(0.200298371563004)	5737(0.196937110695281)	9362(0.196054642499072)	5732(0.191543265388376)	55719(0.184665122873299)	29940(0.17985756600637)	186(0.178446262358395)	80142(0.16399085574533)	5731(0.159480215884033)	1312(0.157369375807)	9536(0.153269796022187)	5733(0.152792126583998)	2182(0.151796964246688)	5730(0.149538454419178)	10956(0.143496874730006)	81606(0.142271883239086)	5629(0.135694341397155)	221955(0.12745357066234)	23761(0.127450309831387)	9256(0.127450021872988)	706(0.127427284944684)	1622(0.127258586189474)	160851(0.127128750841482)	55627(0.126413630524294)
vitamin A	445345	5948(0.643148869564732)	84913(0.641433444643232)	5681(0.640139382063089)	112724(0.640015377571257)	244(0.639985009997283)	1577(0.639652952634702)	5949(0.639612260465249)	9227(0.639512207173012)	145226(0.639277672458048)	6017(0.607358151115004)	8854(0.599434307288136)	54936(0.588626875758229)	339804(0.585655558168805)	57834(0.585655558168805)	166793(0.585655558168805)	26471(0.555489302536965)	90203(0.527782907871202)	1339(0.521819320841534)	5959(0.513944396048401)	9441(0.510374613834014)	216(0.504435749735794)	79413(0.5042042410915)	5947(0.500450295113737)	51619(0.495867753836639)	2197(0.495366604382044)	4889(0.465811481760367)	389722(0.461276821319734)	5995(0.45979882320143)	57169(0.459158946194828)	25913(0.452253382631596)	79364(0.42492183697037)	26548(0.411078615428917)	26524(0.410524085419189)	84962(0.409385590833754)	54998(0.402838369182809)	7376(0.401892523841816)	55092(0.396046915378031)	51599(0.395001484347956)	9107(0.393793418633794)	6182(0.393707428862578)	7707(0.39320106348697)	79177(0.393199145035744)	54929(0.390196416293296)	84557(0.389345639506731)	5916(0.386587201597806)	8994(0.384686470228701)	50805(0.381410099514408)	126374(0.379004476117393)
Ethyl palmitate	12366	1636(0.24253611094017)	5732(0.206571076030223)	9536(0.186183984398325)	186(0.170428232915415)	1312(0.152857767219098)	5731(0.152272845330546)	5737(0.152061054958696)	5730(0.150211104692065)	5733(0.149772261572911)	3652(0.127781361224729)	221955(0.126681115771833)	9256(0.126677307567537)	23761(0.12667723019716)	706(0.126652902828408)	1622(0.126471882840044)	624(0.126437103797938)	160851(0.126107081630536)	55627(0.125443358050091)	60490(0.125096941139225)	54505(0.12467037289297)	1002(0.124458280244492)	10327(0.121485718466902)	55144(0.121485718466902)	2976(0.120938622041664)	55512(0.119972936430677)	81889(0.118994270933631)	112(0.117088005011288)	80152(0.113112516323764)	1139(0.112388251714668)	56259(0.110443412287537)	6336(0.107468489872723)	57658(0.107375296262775)	1137(0.107144004232444)	1000(0.105983077518637)	7447(0.105422479203065)	80852(0.104916632333949)	60468(0.103935866974172)	79174(0.103376481226947)	9734(0.100717360581602)	7468(0.100534392082006)	5145(0.10013881886184)	131890(0.10013881886184)	5158(0.10013881886184)	1464(0.0996814896644512)	2898(0.0992294721151777)	949(0.0987531462640465)	5408(0.0982073814688582)	1208(0.0982073814688564)
Arginine	6322	6779(0.585651605475579)	5016(0.584756503203716)	58503(0.583024883177101)	435(0.543978872313477)	384(0.524714291980369)	5859(0.481341854483761)	29926(0.466922057393614)	1039(0.45964665238758)	9521(0.42613967991483)	9255(0.421501781387549)	445(0.402634500075488)	3735(0.402286078703627)	51520(0.387928510346278)	115677(0.386872657411411)	383(0.378455593695246)	7965(0.374249655201682)	91966(0.373182576975648)	5917(0.372378178210877)	4502(0.360167842263784)	2058(0.352594075991272)	51070(0.351006514106272)	63894(0.343117041146225)	4141(0.340569173321977)	84164(0.330735801864882)	64400(0.329422882322507)	51031(0.328738532365537)	4048(0.327124475993331)	7019(0.326832829390293)	55856(0.324749721713657)	55839(0.324716071520642)	57549(0.324298142067769)	1615(0.322436129311531)	5009(0.316532436865988)	23011(0.315496306786605)	7458(0.31221511932595)	200576(0.311678790067533)	27072(0.31159351021613)	9761(0.31045889285062)	64928(0.304979424629766)	10380(0.304029746344966)	1607(0.297350527395041)	64601(0.29379782836162)	586(0.293567850377834)	55501(0.292954384844608)	26167(0.2927420223296)	84376(0.292455913918987)	1479(0.292325047236393)	56886(0.291616210840653)
Glycycoumarin	5317756	154(0.226186066730877)	5042(0.220988461250796)	10871(0.217868770753278)	7555(0.217725491991276)	84717(0.217147591833114)	23168(0.217145759012136)	7201(0.217109185771964)	81844(0.216245313627953)	84838(0.215686052769714)	408(0.208078000442191)	3360(0.199696865953126)	55661(0.198862217753861)	285855(0.197893770939096)	6039(0.197192949593171)	94233(0.197192949593171)	283248(0.197192949593171)	6553(0.196410004745355)	130(0.19567392637788)	407(0.195550270594299)	260425(0.19554693463862)	23099(0.194120481706782)	3553(0.191528474833696)	90333(0.189527777663494)	1445(0.188484527252823)	57453(0.188096972529072)	155(0.184529079230852)	84545(0.183616319596527)	10203(0.183170778851811)	827(0.182411218487418)	83874(0.181150923347885)	114571(0.180816999992415)	28232(0.180816999992415)	1811(0.180816999992415)	4923(0.180737919251838)	6579(0.179321501443158)	83737(0.17690567318826)	9368(0.176144988533246)	8727(0.175910443037805)	9590(0.174891614223628)	9683(0.173162924352389)	7200(0.173019287724113)	10969(0.172838827990694)	4489(0.172468280427879)	11214(0.17216863516016)	6901(0.170268910954135)	124739(0.169777995533908)	5420(0.169190647410957)	79672(0.168427152804853)
Salvianolic acid A、B、C、D、E、F、G	5281793	84717(0.266655605830791)	7201(0.266623997806065)	23168(0.266361577263393)	154(0.26428179733947)	408(0.25875019247139)	155(0.249951548858601)	130(0.245699439602912)	5042(0.239023550077363)	23099(0.235766568326216)	55661(0.234292654781349)	7555(0.233724629737823)	81844(0.233217511638593)	285855(0.231122592602885)	260425(0.230369318401065)	6553(0.228933969960551)	57453(0.22722208519913)	10969(0.22692992081091)	6039(0.220947164955696)	94233(0.220947164955696)	283248(0.220947164955696)	407(0.213109579203093)	153(0.210535308497407)	4985(0.207005600525623)	4923(0.204428101574319)	3795(0.20349339022354)	3553(0.203274880606387)	10203(0.20161286174793)	90333(0.201152727768707)	2769(0.200441705252871)	84545(0.198466681766444)	114571(0.197082808651553)	28232(0.197082808651553)	1811(0.197082808651553)	28966(0.196743975098336)	83638(0.196330780013022)	10570(0.19476413310425)	27350(0.19181941009293)	10871(0.190966425463612)	6579(0.190443704784725)	9516(0.190031606304962)	7200(0.188932458735533)	51316(0.188787863632235)	57216(0.188314720657789)	9368(0.188234092529908)	57030(0.187147892015787)	22903(0.186594337171907)	6456(0.186535692227356)	5365(0.185999091998498)
Isochlorogenic acid|Ginnol	6474309	84717(0.256539831489626)	7201(0.25651177265048)	23168(0.256368321905135)	6138(0.252924684398357)	408(0.251890514213055)	7555(0.242172281058206)	130(0.23898575478705)	23099(0.238394888199073)	10871(0.237899885766602)	260425(0.233223906752001)	57453(0.227588180672523)	154(0.226164417194814)	5042(0.22497927765884)	9516(0.224691643178819)	9863(0.223609363156209)	51316(0.222757395263103)	155(0.222260068693017)	407(0.221423110074227)	55661(0.220702300983802)	83638(0.220002763690276)	10570(0.219509455823267)	81844(0.219340713113965)	28966(0.219057142975341)	285855(0.217809339887592)	4489(0.21684505728303)	2671(0.216732430816092)	6553(0.215821081071985)	10969(0.21343988189149)	9223(0.21313231858912)	79672(0.212298427337667)	6039(0.211693688925829)	94233(0.211693688925829)	283248(0.211693688925829)	150084(0.209537875266151)	124739(0.208031543951392)	57216(0.206617957696808)	6638(0.204387411739991)	57030(0.203783012156119)	11079(0.203684182133504)	6456(0.203009067121935)	8926(0.201166124450166)	25975(0.198563687331552)	5705(0.1979711952196)	3502(0.197911268333734)	10675(0.197911268333734)	3553(0.19542551847661)	5744(0.19500420136391)	9975(0.194939515004223)
Salsolinol	54456	154(0.284613272610478)	4985(0.271818613417526)	408(0.271268103992047)	84717(0.270431963217716)	7201(0.270403853678321)	23168(0.270135815987187)	2769(0.263486746618091)	155(0.259365267351083)	55661(0.247470232988383)	285855(0.246075134649764)	6553(0.244893209647616)	130(0.241374047520622)	23099(0.241228125793721)	7555(0.238021740035161)	5042(0.236076878279099)	10203(0.231736512627899)	81844(0.231540239929944)	84545(0.228736822240979)	4923(0.228340148876074)	260425(0.225983319250318)	11080(0.224321788955558)	26249(0.223349143146949)	114571(0.221657502276691)	28232(0.221657502276691)	1811(0.221657502276691)	90333(0.221266286940045)	4489(0.220434118184875)	7200(0.219363655369546)	409(0.218971123532382)	156(0.217801781922111)	407(0.217110011033056)	57453(0.216489719605871)	9368(0.215638741496909)	6039(0.215567043853226)	94233(0.215567043853226)	283248(0.215567043853226)	5493(0.213737427084242)	10871(0.213488285513909)	6579(0.213377393790153)	4988(0.212846845579278)	6138(0.21223584866097)	8698(0.212111776835174)	2775(0.211871385078986)	2916(0.211026264354537)	23254(0.210546959913034)	153(0.210393720354032)	83874(0.208425553079776)	4986(0.208407511731666)
Benzoylhypaconine	3047329	1408(0.262049031171679)	5536(0.257029833390447)	50487(0.233075638540927)	7041(0.229365737909415)	573(0.227531121570252)	119710(0.225059825257705)	6554(0.224868313715587)	6605(0.222620334313978)	79915(0.22128784609975)	6336(0.220079297472733)	6601(0.219113437819939)	4857(0.21704853536005)	5927(0.216521728594274)	6756(0.216484552143915)	8028(0.216015577840401)	5883(0.215472412192426)	9604(0.215426478114105)	915(0.213744086983843)	57719(0.213146136260785)	57017(0.213052494304424)	51412(0.212292023660511)	7110(0.21127630143487)	132320(0.211123816843627)	6871(0.210760891800834)	27043(0.210558890573828)	54957(0.210140577965404)	1044(0.210131860864462)	55827(0.210121904371879)	135458(0.210106806889411)	9669(0.209573492267379)	9282(0.209456620939614)	6595(0.208219879678011)	64061(0.208020173056591)	29915(0.207240336288776)	23215(0.207005156954249)	3460(0.206855825966077)	55777(0.206727704458861)	5087(0.206161004402793)	3175(0.205542990820043)	6598(0.205161383957498)	117581(0.204968443415714)	158399(0.204682451221912)	11319(0.204579120851444)	5799(0.204354977198884)	57670(0.204238137090429)	57282(0.204127083130772)	481(0.203846070722363)	23469(0.203155216529172)
nicotiflorin	5318767	10643(0.256113954536199)	7555(0.244823710334373)	7201(0.241746409740233)	84717(0.241741293336921)	23168(0.241683386513168)	5042(0.235554056225941)	23099(0.232470551069458)	79672(0.231689810580272)	124739(0.231131242212524)	10871(0.230616365610161)	6138(0.230539698290642)	81844(0.229951639622404)	408(0.227818635667095)	407(0.225152947700197)	260425(0.225102955915018)	10521(0.222052080199006)	146057(0.221783263351454)	5940(0.221622554277819)	285855(0.221130590341801)	130(0.220658093100034)	55661(0.219879025077647)	6217(0.219759916812798)	6553(0.219557023643462)	6137(0.219476487108353)	10664(0.218043946219788)	84342(0.216962501638946)	83548(0.216306968321865)	57511(0.216306968321865)	22796(0.216306968321865)	9382(0.216306968321865)	91949(0.216306968321865)	6039(0.21601079963454)	94233(0.21601079963454)	283248(0.21601079963454)	57453(0.215838583637017)	154(0.215654721641523)	150084(0.21374264598786)	9223(0.213734496701484)	83737(0.213320449284086)	9689(0.210296607201289)	6238(0.209587945650074)	23178(0.209494488769179)	94086(0.209268307685276)	220988(0.208097918028427)	10992(0.207978291214867)	5257(0.207289701205754)	9221(0.206631106158763)	5954(0.205707047764363)
Salvianolic acid E	49770697	84717(0.273155391341848)	7201(0.273114453492567)	23168(0.272986305578702)	408(0.272192487853684)	9516(0.265041217666502)	154(0.264905726710384)	55661(0.25564171145643)	285855(0.254115867732293)	6553(0.252533927318585)	130(0.247731218708494)	84838(0.245998714491998)	23099(0.242316446829185)	4489(0.241096982794338)	10871(0.241044914457805)	155(0.240509447990393)	51316(0.23692247294898)	5042(0.231252276522538)	7555(0.231020344315097)	84545(0.230643548310588)	10203(0.230520716068898)	81844(0.227029288512863)	260425(0.225356036079389)	4923(0.223509763701188)	7200(0.218738368906357)	407(0.218036123918123)	409(0.217735712754762)	57453(0.217608379798332)	11214(0.214637004203273)	3795(0.212761263909884)	6039(0.211023371576609)	94233(0.211023371576609)	283248(0.211023371576609)	8727(0.20944003957322)	153(0.207475132926585)	3553(0.206839019276773)	9590(0.204906301571672)	81873(0.204742415325429)	4985(0.203706853124826)	10987(0.203416835709557)	8455(0.203004337598605)	10969(0.202831421421513)	10267(0.2025419686653)	5705(0.202024454726781)	6138(0.20064591761361)	5744(0.199147769127101)	4185(0.197263871007183)	90333(0.196989418793947)	3643(0.19560379087488)
3α-HydroxytanshinoneⅡA	5318350	84717(0.199729126019269)	7201(0.19970039717984)	23168(0.199514232934528)	154(0.186349286141022)	408(0.184951800895364)	130(0.181902141699491)	90333(0.179645136391785)	525(0.17901800841101)	114571(0.178630050423932)	28232(0.178630050423932)	1811(0.178630050423932)	5042(0.177360986930653)	55661(0.175608487495297)	285855(0.174994381782701)	23099(0.174153352431878)	4897(0.173199579019839)	6553(0.173032646918799)	81844(0.17266507421303)	155(0.171686496809706)	22903(0.170954898767359)	153(0.170942943976853)	6579(0.170810902009526)	260425(0.170179687780819)	57453(0.169409387381689)	5365(0.168892587533159)	6039(0.168154712656994)	94233(0.168154712656994)	283248(0.168154712656994)	54585(0.167819521896835)	8906(0.167726985941218)	7855(0.164339367096147)	9368(0.162405864086812)	156(0.161961277484274)	83874(0.161765085600037)	4923(0.160630466363428)	84545(0.160262630020283)	10203(0.160036685809754)	2769(0.158677695650795)	1318(0.156954282318225)	1445(0.15633479760177)	2870(0.155777228676017)	827(0.155085814721416)	6456(0.154513758723564)	27350(0.15422636177983)	407(0.15376422419549)	10267(0.153392233400467)	7555(0.152780490776655)	57030(0.152476891360972)
DihydrotanshinoneⅠ	5316743	121274(0.180013889020977)	6713(0.178972087803353)	51573(0.177656492928708)	1723(0.177372149509764)	11202(0.170475404689167)	54663(0.170475404689167)	4537(0.168367848698213)	518(0.168367848698213)	9552(0.168367848698213)	167838(0.168100177046373)	55890(0.167783831289098)	6530(0.167599876367447)	9751(0.167573995344123)	134957(0.165615412864422)	4924(0.165589815861473)	29091(0.165490018831314)	5743(0.163006668372615)	496(0.162816238404195)	6843(0.16138549454151)	5997(0.161050764853137)	6804(0.159827145824326)	90379(0.155537572240435)	54876(0.155537572240435)	9066(0.155235941845241)	79269(0.155195832670273)	1520(0.154121976236107)	51699(0.153686760853934)	8519(0.153109115788073)	7920(0.151103456468644)	50813(0.148763582695625)	5742(0.146779735629829)	81502(0.145998559395151)	8451(0.144895059078263)	84065(0.142795196189194)	1128(0.142554300185592)	1473(0.142119768668491)	9978(0.14204497503708)	230(0.14095748146331)	6532(0.140080575446241)	6845(0.139268114206325)	54221(0.138295515668817)	6439(0.136331253015717)	632(0.135549711851771)	1512(0.135483330558399)	6813(0.134328011576786)	6531(0.133414133766734)	55638(0.131774489245795)	525(0.131758504621391)
2－Acetyl furan	145220	260425(0.373071163997766)	57453(0.37114185103816)	5042(0.36201404250941)	81844(0.356067499756721)	154(0.34552222732728)	7555(0.345216472487201)	57030(0.343965613455805)	28966(0.34387155402964)	83638(0.342578747717504)	9223(0.341488875768578)	9863(0.337929022785737)	6456(0.337797743065706)	10570(0.337312643259946)	84717(0.336467275422108)	7201(0.33642496220967)	23168(0.336212235756893)	6039(0.334934950096459)	94233(0.334934950096459)	283248(0.334934950096459)	9590(0.332101470598099)	408(0.32977606826152)	25975(0.328928341391448)	407(0.328551517637334)	153(0.326306758278109)	57216(0.320288291536338)	150084(0.319949325945083)	4897(0.314934469626842)	11079(0.313297544110428)	6457(0.313290106051492)	130(0.309091944175718)	55661(0.307722982930654)	285855(0.306297934159655)	3502(0.30548095752012)	10675(0.30548095752012)	23099(0.305062944866401)	10969(0.30498361408657)	6553(0.304581896116404)	8325(0.300836498981009)	22903(0.29977634996994)	3553(0.299747343089804)	5365(0.298435759068983)	1445(0.295072721047157)	5420(0.291305533732584)	10871(0.290352023293322)	57120(0.290215580456945)	9228(0.289579091579514)	155(0.288225060975257)	3795(0.285652841982552)
Dihydrobaicalin	14135325	4547(0.328304767479142)	7201(0.240394723109141)	84717(0.240393900990107)	23168(0.240022457696685)	5042(0.235815901623391)	154(0.234761562273802)	81844(0.232872444273714)	130(0.231836493719869)	57453(0.230395125164113)	260425(0.228951557319549)	408(0.228879188842121)	6039(0.223260586991866)	94233(0.223260586991866)	283248(0.223260586991866)	7555(0.220699405185016)	23099(0.219228369335272)	55661(0.216804956155612)	285855(0.215901635791193)	6553(0.213159979047888)	153(0.209686085447249)	407(0.205916618346666)	2870(0.205536386003826)	27350(0.204545455714761)	9590(0.203458806586974)	28966(0.201670178909582)	83638(0.201265876526574)	10969(0.198917726854808)	10570(0.198535129364624)	57216(0.19829818360466)	57030(0.196611913685923)	22903(0.196349078116855)	25975(0.194566644175215)	5365(0.194355709318942)	83737(0.192907868991926)	4842(0.192690977911785)	54585(0.191375751701571)	5639(0.191315277063802)	80762(0.191315277063802)	9683(0.191230112448437)	3795(0.190480942253218)	9630(0.190246801997945)	6456(0.18968841461523)	150084(0.18922207351669)	7855(0.188156606300722)	155(0.187672387359651)	4897(0.187323132388712)	525(0.185987268002861)	4734(0.18571545895535)
Cistanoside D	5315929	84717(0.231286773342183)	7201(0.231276154857114)	23168(0.231087684367795)	154(0.219735969927446)	130(0.218426468873785)	408(0.2181638051417)	5042(0.213395623529532)	23099(0.207907195243128)	7555(0.207319792616007)	260425(0.20727767731549)	81844(0.207130793401545)	285855(0.203305388217452)	55661(0.202708480797062)	57453(0.201737594065091)	6553(0.201111153892527)	6039(0.193950542750203)	94233(0.193950542750203)	283248(0.193950542750203)	150084(0.189643078127184)	407(0.189105022650064)	155(0.187760377851234)	57030(0.187216858601762)	28966(0.18480315432187)	83638(0.183639446009345)	9223(0.183035403429644)	6456(0.182010337277738)	1445(0.181024826864265)	6138(0.179902878412766)	25975(0.179408111237833)	10570(0.178434756065036)	9689(0.174600696864627)	90333(0.174320792068605)	57216(0.173926926091801)	9590(0.173864399937761)	9863(0.17318861330057)	3553(0.172636744652608)	27350(0.170516317350619)	114571(0.170231876994632)	28232(0.170231876994632)	1811(0.170231876994632)	10969(0.169856097240779)	3795(0.169557547828915)	22903(0.168985831093644)	83737(0.168231079509097)	10871(0.167711164654046)	5365(0.167239429037771)	10643(0.167150838707632)	4985(0.166533290233611)
Aconitine	245005	7272(0.293529896889279)	81027(0.28232811204827)	7444(0.261107196652027)	1780(0.260510886851812)	566(0.258058851038802)	638(0.254481592758437)	5366(0.252687802056949)	7536(0.242579829637288)	79915(0.240543875829653)	63970(0.238767334141191)	6871(0.236879818242673)	50487(0.23578291557433)	8739(0.235475246391665)	9669(0.234795247745027)	23215(0.233529609061257)	6336(0.232508059840726)	5883(0.232343081248094)	481(0.23218108666324)	915(0.232132313869675)	158399(0.231311433728232)	662(0.231307039942583)	23469(0.230305038984701)	9716(0.229965599082785)	7041(0.229541143671564)	6554(0.229496638090395)	5087(0.229492460961352)	11319(0.229486793367552)	135458(0.229453135008895)	1059(0.22879227965893)	3175(0.228658033557813)	119710(0.228653658589844)	64112(0.228642436878561)	51283(0.228379145234583)	64061(0.228287851371749)	6249(0.227937923233364)	7267(0.227796065115617)	5534(0.227793701901018)	79370(0.227322221394658)	55617(0.22720345944716)	132320(0.226457602729378)	5799(0.226373664249453)	3218(0.226332072503849)	8125(0.226054853233963)	3211(0.225663135447985)	3460(0.225394909316813)	9729(0.224210275133019)	10092(0.223896107320122)	225689(0.223895145211074)
gancaonin	5317483	84717(0.224767299048571)	23168(0.224759740239465)	7201(0.224728831298877)	408(0.216664676412492)	154(0.215288944269292)	130(0.202895931691673)	5042(0.201201223390839)	55661(0.200911823267388)	23099(0.200334584172519)	285855(0.200016833803603)	6553(0.198535647660836)	7555(0.197452702761066)	81844(0.196684406017346)	83874(0.196554843600162)	827(0.196417305877384)	260425(0.194365907529089)	3795(0.191050336453707)	1445(0.187284129094365)	57453(0.186711473378088)	57030(0.185501695100942)	10871(0.183312888122347)	6456(0.181145340959079)	3360(0.180613467521702)	6039(0.178458840693445)	94233(0.178458840693445)	283248(0.178458840693445)	407(0.176256869153699)	155(0.175497759935402)	90333(0.17547323866799)	3553(0.175027440897652)	25975(0.174773976521833)	84545(0.174570420972934)	4489(0.174292907341756)	10203(0.17403548150258)	4923(0.173268171581326)	342574(0.172770599599652)	114571(0.16931341618029)	28232(0.16931341618029)	1811(0.16931341618029)	9590(0.168392929632366)	4985(0.167979503459572)	4842(0.166930396569933)	4897(0.166929765633494)	6901(0.166408766610802)	6579(0.166057924836324)	9863(0.166051002100617)	28966(0.165381596446683)	124739(0.164970696155924)
Salvianolic acid C	5321087	84717(0.269335867180407)	7201(0.269299594954485)	23168(0.269096641932964)	408(0.259900450037279)	154(0.252357999095942)	130(0.249839528239622)	155(0.243089197843628)	23099(0.241002750974375)	55661(0.236993764959643)	285855(0.233906153318509)	6553(0.23157352964454)	5042(0.228564633631297)	260425(0.224479059129385)	81844(0.222901432276765)	7555(0.221294720898792)	57453(0.220798507913356)	10969(0.217975131125525)	51316(0.214965687472336)	6039(0.210168497600459)	94233(0.210168497600459)	283248(0.210168497600459)	4923(0.209329732786415)	3795(0.2078047497302)	153(0.207514082816293)	10203(0.20680428531635)	407(0.204058576365852)	84545(0.203683836405022)	10871(0.201526587986186)	6456(0.199138448026186)	57030(0.198844349198586)	90333(0.197407543012326)	28966(0.196120053703271)	4985(0.196022897118375)	83638(0.195530415646071)	8455(0.194507862553072)	3553(0.194036771442897)	114571(0.194015007949586)	28232(0.194015007949586)	1811(0.194015007949586)	4897(0.19379456949551)	10570(0.193712643401672)	7200(0.193147476343095)	25975(0.191139221588283)	8528(0.190428465671523)	6579(0.188274795954235)	1445(0.188142659648443)	22903(0.186160368603634)	9863(0.185638880045045)
Mesaconitine	17679	7272(0.287386230394419)	81027(0.281834150985343)	566(0.252024955725241)	7444(0.244090771537649)	1780(0.241979414502626)	5366(0.241339501214787)	638(0.240742479028673)	63970(0.229378122717628)	8739(0.225247688616155)	662(0.222805365084837)	7536(0.221312050832908)	4775(0.220528956467791)	79370(0.218548381015795)	51283(0.216632344225675)	79915(0.215217303616154)	64112(0.214801517729048)	663(0.213741373646838)	915(0.210990119500276)	9088(0.210658314427059)	6871(0.208328341595036)	5883(0.207413480036859)	23215(0.207306474294422)	9445(0.206617732757964)	1408(0.205354724294292)	158399(0.205017036754032)	9669(0.204656211899947)	135458(0.204520816078234)	3460(0.204222029998039)	64061(0.204164648329808)	23469(0.203912907889062)	9716(0.203593422018198)	6554(0.203541575972612)	5087(0.202641313207517)	119710(0.202629036928661)	11319(0.202409297706373)	9413(0.201815440204755)	3175(0.201160144498437)	6249(0.200881800767127)	50487(0.200764493098412)	7267(0.200584661247604)	665(0.199976824908136)	55617(0.19973842131158)	3218(0.199531809744244)	5799(0.198712173721868)	7009(0.198592582238355)	481(0.19858346448133)	8558(0.198539103698877)	9729(0.198374676191445)
[truncated: 5,000 more columns]
